# Supplementary material
Source: HighWire-hosted journal article supplement (https://tobaccocontrol.bmj.com/highwire/filestream/169035/field_highwire_adjunct_files/2/tc-2024-058718supp003_data_supplement.pdf)
Supplement: tc-2024-058718supp003_data_supplement.pdf [file tc-2024-058718supp003_data_supplement.pdf]

Supplement C. Evidence Table of Records Assessing Neighborhood-Level Inequities in Tobacco Retailer Availability, N=58

| Author (Year), ID              | Study Design    | Study Location    | Unit of Analysis (N)   | Statistical Approach | Data Source (Year): Area-Level Sociodemographic Variable   | Data Source (Year): Tobacco Retailers                                    | Number and Type of Tobacco Retailers Included                                                                        | Area-Level Outcome Variable Operationalization                                                                                                                                                                                     | Unadjusted Effect Sizes             | Risk of Bias                                                                                         |
|--------------------------------|-----------------|-------------------|------------------------|----------------------|------------------------------------------------------------|--------------------------------------------------------------------------|----------------------------------------------------------------------------------------------------------------------|------------------------------------------------------------------------------------------------------------------------------------------------------------------------------------------------------------------------------------|-------------------------------------|------------------------------------------------------------------------------------------------------|
| Adachi-Mejia 2012 <sup>1</sup> | Cross-sectional | USA (contiguous ) | Census tract (N=3,456) | Pearson correlation  | U.S. Census (2000)<br><br>Proportion population Black      | North American Industry Classification System (NAICS) Association (2007) | N=306,695<br><br>Tobacco stores, grocery stores, gas stations and convenience stores based on primary NAICS activity | Adaptive bandwidth kernel density estimation (bandwidth maximum: 25 kilometer radius (sparsely populated regions) or 1000 population; cell size = 0.5-mile pixels): count of tobacco retailers per 1000 people (assigned at pixel) | ES1: r=0.27 (p-value not specified) | 2: Yes<br><br>11: Yes<br>13: No<br><br>18: Yes<br>20: Yes<br><br>NA1: No<br>NA2: Yes<br><br>Total: 5 |
|                                |                 |                   |                        |                      | Proportion population Hispanic                             |                                                                          |                                                                                                                      | Adaptive bandwidth kernel density estimation (bandwidth maximum: 25 kilometer radius (sparsely populated regions) or 1000 population; cell size = 0.5-mile pixels): count of tobacco retailers per 1000 people (assigned at pixel) | ES2: r=0.26 (p-value not specified) |                                                                                                      |
|                                |                 |                   |                        |                      | Proportion of families with income below the poverty level |                                                                          |                                                                                                                      | Adaptive bandwidth kernel density estimation (bandwidth maximum: 25 kilometer radius (sparsely populated regions) or 1000 population; cell size = 0.5-mile pixels): count of tobacco retailers                                     | ES3: r=0.39 (p-value not specified) |                                                                                                      |

**Notes:** We used a modified Downs and Black checklist to assess the risk of bias (see online repository protocol). We created a risk of bias index (0-7, with higher numbers indicating higher risk of bias) and *a priori* planned to exclude any studies with a score of 4 or higher (none were excluded).  
*Italicized records* represent records or effect sizes that were excluded from synthesis and analysis because they 1) were combined with another record or 2) only reported adjusted effect sizes.  
<sup>1</sup>These two studies used similar methods to examine identical relationships with the same data, so only the first published study was included for analysis  
ES=Effect Size

| Author (Year), ID                    | Study Design    | Study Location                                        | Unit of Analysis (N)                | Statistical Approach                 | Data Source (Year): Area-Level Sociodemographic Variable                                                                                                                                                                                                                                                                                                                                                                                                                                                                                                                                      | Data Source (Year): Tobacco Retailers                                                                                                                                                                                                                                                                                  | Number and Type of Tobacco Retailers Included                                                                   | Area-Level Outcome Variable Operationalization                                         | Unadjusted Effect Sizes                                                                                                                                                                                                                                                                                           | Risk of Bias                                                                                          |
|--------------------------------------|-----------------|-------------------------------------------------------|-------------------------------------|--------------------------------------|-----------------------------------------------------------------------------------------------------------------------------------------------------------------------------------------------------------------------------------------------------------------------------------------------------------------------------------------------------------------------------------------------------------------------------------------------------------------------------------------------------------------------------------------------------------------------------------------------|------------------------------------------------------------------------------------------------------------------------------------------------------------------------------------------------------------------------------------------------------------------------------------------------------------------------|-----------------------------------------------------------------------------------------------------------------|----------------------------------------------------------------------------------------|-------------------------------------------------------------------------------------------------------------------------------------------------------------------------------------------------------------------------------------------------------------------------------------------------------------------|-------------------------------------------------------------------------------------------------------|
|                                      |                 |                                                       |                                     |                                      |                                                                                                                                                                                                                                                                                                                                                                                                                                                                                                                                                                                               |                                                                                                                                                                                                                                                                                                                        |                                                                                                                 | per 1000 people (assigned at pixel)                                                    |                                                                                                                                                                                                                                                                                                                   |                                                                                                       |
| <i>Adibe 2019</i> <sup>2</sup>       | Cross-sectional | Ohio<br><br>USA                                       | Census tract (N=2,937)              | Negative binomial spatial regression | 5-year American Community Survey (2016) <ul style="list-style-type: none"><li>Percent African American (dichotomized into “High” vs. “Low” prevalence if 15% or more of the population was African American)</li><li>Percent Hispanic (dichotomized into “High” vs. “Low” prevalence if 15% or more of the population was Hispanic)</li><li>Percent Asian (dichotomized into “High” vs. “Low” prevalence if 15% or more of the population was Asian)</li><li>Poverty (dichotomized into “High” vs. “Low” prevalence if 15.4% or more of the population was below the poverty level)</li></ul> | Licensed cigarette retailers: Ohio’s county auditor offices (September 2017-December 2017)<br><br>Hookah cafes and e-cigarette retailers: six Internet directories (i.e., Yelp, E-Cigarette-Store-Reviews.com, Hookah-Hookah, the Yellow Pages, Better Business Bureau, Hoover directories) (December 2017-April 2018) | N=11,389 (11,065 cigarette licenses and 327 vape/hookah retailers and cafes – 3 retailers omitted for analyses) | Count of tobacco retailers per 1,000 people                                            | No unadjusted effect sizes reported.<br><br>“There were more (from 1.4-1.9 times as many) retailers per capita in high-poverty vs. low-poverty tracts. [...] Density was also greater in tracts with a high (vs. low) prevalence of African Americans (1.1 times as many) and Hispanics (1.2 times as many).” p.1 | 2: Yes<br><br>11: Yes<br>13: No<br><br>18: Yes<br>20: Yes<br><br>NA1: Yes<br>NA2: Yes<br><br>Total: 6 |
| Anesetti-Rothermel 2020 <sup>3</sup> | Cross-sectional | Washington DC; DC metropolitan statistical area (MSA) | Census tract (DC=177; DC MSA=1,428) | Spearman correlation                 | American Community Survey (2011-2015)                                                                                                                                                                                                                                                                                                                                                                                                                                                                                                                                                         | Dun and Bradstreet’s Hoovers database (2015) and using North American                                                                                                                                                                                                                                                  | DC (N=743)<br>DC MSA (N=4,539)<br><br>Ten NAICS categories: beer, wine                                          | Adaptive bandwidth kernel density estimation (bandwidth maximum: 1,000 people; spatial | ES1: DC: R <sub>s</sub> : -0.38, p=0.00; spatially adjusted p=0.00<br><br>ES5: DC MSA: R <sub>s</sub> : 0.10, p=0.00; spatially adjusted p=0.12                                                                                                                                                                   | 2: Yes<br><br>11: Yes<br>13: No                                                                       |

**Notes:** We used a modified Downs and Black checklist to assess the risk of bias (see online repository protocol). We created a risk of bias index (0-7, with higher numbers indicating higher risk of bias) and *a priori* planned to exclude any studies with a score of 4 or higher (none were excluded).

*Italicized records* represent records or effect sizes that were excluded from synthesis and analysis because they 1) were combined with another record or 2) only reported adjusted effect sizes.

<sup>†</sup>These two studies used similar methods to examine identical relationships with the same data, so only the first published study was included for analysis

ES=Effect Size

| Author (Year), ID | Study Design | Study Location | Unit of Analysis (N) | Statistical Approach             | Data Source (Year): Area-Level Sociodemographic Variable | Data Source (Year): Tobacco Retailers             | Number and Type of Tobacco Retailers Included                                                                                                                                                                                                                                     | Area-Level Outcome Variable Operationalization                                                                                                                                                                 | Unadjusted Effect Sizes                                                                                              | Risk of Bias                                                  |
|-------------------|--------------|----------------|----------------------|----------------------------------|----------------------------------------------------------|---------------------------------------------------|-----------------------------------------------------------------------------------------------------------------------------------------------------------------------------------------------------------------------------------------------------------------------------------|----------------------------------------------------------------------------------------------------------------------------------------------------------------------------------------------------------------|----------------------------------------------------------------------------------------------------------------------|---------------------------------------------------------------|
|                   |              | USA            |                      |                                  | Percent of non-Hispanic African American residents       | Industry Classification System (NAICS) categories | and liquor stores; supermarkets and other grocery stores; convenience stores; pharmacies and drug stores; gasoline stations with convenience stores; other gasoline stations; department stores; discount department stores; tobacco stores; and warehouse clubs and supercenters | resolution: 250 meters): count of tobacco retailers per 1,000 daytime population (averaged across pixels within tracts)                                                                                        |                                                                                                                      | 18: Yes<br>20: Yes<br><br>NA1: No<br>NA2: Yes<br><br>Total: 5 |
|                   |              |                |                      | Bivariate spatial lag regression | Percent of non-Hispanic African American residents       |                                                   |                                                                                                                                                                                                                                                                                   | Adaptive bandwidth kernel density estimation (bandwidth maximum: 1,000 people; spatial resolution: 250 meters): count of tobacco retailers per 1,000 daytime population (averaged across pixels within tracts) | ES9: DC: Coefficient: -0.013, SE: 0.006, p=0.018<br><br>ES13: DC MSA: Coefficient: 0.334, SE: 0.29, p=0.25           |                                                               |
|                   |              |                |                      | Spearman correlation             | Percent of Hispanic residents                            |                                                   |                                                                                                                                                                                                                                                                                   | Adaptive bandwidth kernel density estimation (bandwidth maximum: 1,000 people; spatial resolution: 250 meters): count of tobacco retailers per 1,000 daytime                                                   | ES2: DC: Rs: 0.34, p=0.00; spatially adjusted p=0.00<br><br>ES6: DC MSA: Rs: 0.19, p=0.00; spatially adjusted p=0.00 |                                                               |

**Notes:** We used a modified Downs and Black checklist to assess the risk of bias (see online repository protocol). We created a risk of bias index (0-7, with higher numbers indicating higher risk of bias) and *a priori* planned to exclude any studies with a score of 4 or higher (none were excluded).

*Italicized records* represent records or effect sizes that were excluded from synthesis and analysis because they 1) were combined with another record or 2) only reported adjusted effect sizes.

\*These two studies used similar methods to examine identical relationships with the same data, so only the first published study was included for analysis

ES=Effect Size

| Author (Year), ID | Study Design | Study Location | Unit of Analysis (N) | Statistical Approach             | Data Source (Year): Area-Level Sociodemographic Variable   | Data Source (Year): Tobacco Retailers | Number and Type of Tobacco Retailers Included | Area-Level Outcome Variable Operationalization                                                                                                                                                                 | Unadjusted Effect Sizes                                                                                               | Risk of Bias |
|-------------------|--------------|----------------|----------------------|----------------------------------|------------------------------------------------------------|---------------------------------------|-----------------------------------------------|----------------------------------------------------------------------------------------------------------------------------------------------------------------------------------------------------------------|-----------------------------------------------------------------------------------------------------------------------|--------------|
|                   |              |                |                      |                                  |                                                            |                                       |                                               | population (averaged across pixels within tracts)                                                                                                                                                              |                                                                                                                       |              |
|                   |              |                |                      | Bivariate spatial lag regression | Percent of Hispanic residents                              |                                       |                                               | Adaptive bandwidth kernel density estimation (bandwidth maximum: 1,000 people; spatial resolution: 250 meters): count of tobacco retailers per 1,000 daytime population (averaged across pixels within tracts) | ES10: DC: Coefficient: 0.058, SE: 0.022, p=0.007<br><br>E14: DC MSA: Coefficient: 1.716, SE: 0.621, p=0.006           |              |
|                   |              |                |                      | Spearman correlation             | Percent of families living below the federal poverty level |                                       |                                               | Adaptive bandwidth kernel density estimation (bandwidth maximum: 1,000 people; spatial resolution: 250 meters): count of tobacco retailers per 1,000 daytime population (averaged across pixels within tracts) | ES3: DC: Rs: -0.15, p=0.04; spatially adjusted p=0.02<br><br>ES7: DC MSA: Rs: 0.11, p=0.00; spatially adjusted p=0.00 |              |
|                   |              |                |                      | Bivariate spatial lag regression | Percent of families living below the federal poverty level |                                       |                                               | Adaptive bandwidth kernel density estimation (bandwidth maximum: 1,000 people; spatial resolution: 250 meters): count of tobacco retailers per 1,000 daytime                                                   | ES11: DC: Coefficient: -0.012, SE: 0.013, p=0.367<br><br>ES15: DC MSA: Coefficient: 3.513, SE: 1.073, p=0.001         |              |

**Notes:** We used a modified Downs and Black checklist to assess the risk of bias (see online repository protocol). We created a risk of bias index (0-7, with higher numbers indicating higher risk of bias) and *a priori* planned to exclude any studies with a score of 4 or higher (none were excluded).

*Italicized records* represent records or effect sizes that were excluded from synthesis and analysis because they 1) were combined with another record or 2) only reported adjusted effect sizes.

\*These two studies used similar methods to examine identical relationships with the same data, so only the first published study was included for analysis

ES=Effect Size

| Author (Year), ID            | Study Design    | Study Location                                                                                                                                                                            | Unit of Analysis (N)    | Statistical Approach                                               | Data Source (Year): Area-Level Sociodemographic Variable                                                            | Data Source (Year): Tobacco Retailers                                              | Number and Type of Tobacco Retailers Included                                                | Area-Level Outcome Variable Operationalization                                                                                                                                                                 | Unadjusted Effect Sizes                                                                                                                                                                                                                                                                       | Risk of Bias                                                                                         |
|------------------------------|-----------------|-------------------------------------------------------------------------------------------------------------------------------------------------------------------------------------------|-------------------------|--------------------------------------------------------------------|---------------------------------------------------------------------------------------------------------------------|------------------------------------------------------------------------------------|----------------------------------------------------------------------------------------------|----------------------------------------------------------------------------------------------------------------------------------------------------------------------------------------------------------------|-----------------------------------------------------------------------------------------------------------------------------------------------------------------------------------------------------------------------------------------------------------------------------------------------|------------------------------------------------------------------------------------------------------|
|                              |                 |                                                                                                                                                                                           |                         |                                                                    |                                                                                                                     |                                                                                    |                                                                                              | population (averaged across pixels within tracts)                                                                                                                                                              |                                                                                                                                                                                                                                                                                               |                                                                                                      |
|                              |                 |                                                                                                                                                                                           |                         | Spearman correlation                                               | Total number of jobs                                                                                                |                                                                                    |                                                                                              | Adaptive bandwidth kernel density estimation (bandwidth maximum: 1,000 people; spatial resolution: 250 meters): count of tobacco retailers per 1,000 daytime population (averaged across pixels within tracts) | ES4: DC: R <sub>s</sub> : 0.32, p=0.00; spatially adjusted p=0.12<br><br>ES8: DC MSA: R <sub>s</sub> : 0.29, p=0.00; spatially adjusted p=0.00                                                                                                                                                |                                                                                                      |
| <b>Berg 2020<sup>†</sup></b> | Cross-sectional | Metropolitan statistical areas (Atlanta-Sandy Springs-Roswell [Georgia]; Boston-Cambridge-Newton [Massachusetts]; Minneapolis-St. Paul-Bloomington [Minnesota]; Oklahoma City [Oklahoma]) | Census tracts (N=4,307) | Logistic regression (stratified by metropolitan statistical areas) | American Community Survey (2013-2017)<br><br>• Percent non-White (quartiles)<br>Median household income (quartiles) | Convenience stores: ReferenceUSA (December 2018); Dun & Bradstreet (November 2018) | Convenience stores (N=10,777): “predominately sell vaping and other tobacco products” (p. 2) | Presence (vs. absence) of at least convenience store                                                                                                                                                           | No unadjusted effect sizes reported.<br><br>“Convenience stores more likely resided in tracts with lower percentages of non-Whites in Atlanta and Boston; lower incomes in Atlanta, Boston, San Diego, and Seattle; and higher percentages of youth in Atlanta, Boston, and Minneapolis.” p.1 | 2: Yes<br><br>11: Yes<br>13: No<br><br>18: Yes<br>20: Yes<br><br>NA1: No<br>NA2: Yes<br><br>Total: 5 |

**Notes:** We used a modified Downs and Black checklist to assess the risk of bias (see online repository protocol). We created a risk of bias index (0-7, with higher numbers indicating higher risk of bias) and *a priori* planned to exclude any studies with a score of 4 or higher (none were excluded).

*Italicized records* represent records or effect sizes that were excluded from synthesis and analysis because they 1) were combined with another record or 2) only reported adjusted effect sizes.

<sup>†</sup>These two studies used similar methods to examine identical relationships with the same data, so only the first published study was included for analysis

ES=Effect Size

| Author (Year), ID          | Study Design    | Study Location                                                                          | Unit of Analysis (N)    | Statistical Approach       | Data Source (Year): Area-Level Sociodemographic Variable                                         | Data Source (Year): Tobacco Retailers                     | Number and Type of Tobacco Retailers Included                                                                                                | Area-Level Outcome Variable Operationalization     | Unadjusted Effect Sizes                                     | Risk of Bias                                                                                 |
|----------------------------|-----------------|-----------------------------------------------------------------------------------------|-------------------------|----------------------------|--------------------------------------------------------------------------------------------------|-----------------------------------------------------------|----------------------------------------------------------------------------------------------------------------------------------------------|----------------------------------------------------|-------------------------------------------------------------|----------------------------------------------------------------------------------------------|
|                            |                 | ; San Diego-Carlsbad [California]; and Seattle-Tacoma-Bellevue [Washington])<br><br>USA |                         |                            |                                                                                                  |                                                           |                                                                                                                                              |                                                    |                                                             |                                                                                              |
| Bostea n 2022 <sup>5</sup> | Cross-sectional | California<br><br>USA                                                                   | Census tracts (N=7,888) | Bivariate correlations     | 5-year American Community Survey (2016)<br><br>Percent foreign-born Latinx (born outside the US) | DataAxle, formerly InfoUSA (2018) using primary SIC codes | N=20,990<br><br>Tobacco retailers (gas stations, convenience stores, liquor stores, tobacco shops [excluding supermarkets and drugs stores]) | Count of tobacco retailers per 10 miles of roadway | ES3: 0.230                                                  | 2: Yes<br>11: Yes<br>13: No<br><br>18: Yes<br>20: Yes<br><br>NA1: No<br>NA2: Yes<br>Total: 5 |
|                            |                 |                                                                                         |                         | Bivariate analyses (ANOVA) | Percent foreign-born Latinx (tertiled into low, medium, high)                                    |                                                           |                                                                                                                                              | Count of tobacco retailers per 10 miles of roadway | ES1:<br>Low: 1.0<br>Medium: 1.4<br>High: 2.1<br><br>p<0.001 |                                                                                              |
|                            |                 |                                                                                         |                         | Bivariate correlations     | Percent Latinx                                                                                   |                                                           |                                                                                                                                              | Count of tobacco retailers per 10 miles of roadway | ES5: 0.147                                                  |                                                                                              |
|                            |                 |                                                                                         |                         | Bivariate correlations     | Percent non-Latinx foreign-born Asian (excludes Native Hawaiian, Pacific Islanders)              |                                                           |                                                                                                                                              | Count of tobacco retailers per 10 miles of roadway | ES4: 0.085                                                  |                                                                                              |

**Notes:** We used a modified Downs and Black checklist to assess the risk of bias (see online repository protocol). We created a risk of bias index (0-7, with higher numbers indicating higher risk of bias) and *a priori* planned to exclude any studies with a score of 4 or higher (none were excluded).

*Italicized records* represent records or effect sizes that were excluded from synthesis and analysis because they 1) were combined with another record or 2) only reported adjusted effect sizes.

<sup>\*</sup>These two studies used similar methods to examine identical relationships with the same data, so only the first published study was included for analysis

ES=Effect Size

| Author (Year), ID          | Study Design    | Study Location                 | Unit of Analysis (N)          | Statistical Approach                       | Data Source (Year): Area-Level Sociodemographic Variable                                                                              | Data Source (Year): Tobacco Retailers                                                         | Number and Type of Tobacco Retailers Included | Area-Level Outcome Variable Operationalization                                                                                                     | Unadjusted Effect Sizes                                                                                                                                         | Risk of Bias                                                                                   |
|----------------------------|-----------------|--------------------------------|-------------------------------|--------------------------------------------|---------------------------------------------------------------------------------------------------------------------------------------|-----------------------------------------------------------------------------------------------|-----------------------------------------------|----------------------------------------------------------------------------------------------------------------------------------------------------|-----------------------------------------------------------------------------------------------------------------------------------------------------------------|------------------------------------------------------------------------------------------------|
|                            |                 |                                |                               | Bivariate analyses (ANOVA)                 | Percent non-Latinx foreign-born Asian (excludes Native Hawaiian, Pacific Islanders)                                                   |                                                                                               |                                               | Count of tobacco retailers per 10 miles of roadway                                                                                                 | ES2: Low: 1.4<br>Medium: 1.4<br>High: 1.8<br><br>p<0.001                                                                                                        |                                                                                                |
|                            |                 |                                |                               | Bivariate correlations                     | Percent Asian                                                                                                                         |                                                                                               |                                               | Count of tobacco retailers per 10 miles of roadway                                                                                                 | ES6: 0.131                                                                                                                                                      |                                                                                                |
|                            |                 |                                |                               | Bivariate correlations                     | Percent non-Latinx/Hispanic White only                                                                                                |                                                                                               |                                               | Count of tobacco retailers per 10 miles of roadway                                                                                                 | ES7: -0.269                                                                                                                                                     |                                                                                                |
|                            |                 |                                |                               | Bivariate correlations                     | Median household income                                                                                                               |                                                                                               |                                               | Count of tobacco retailers per 10 miles of roadway                                                                                                 | ES8: -0.172                                                                                                                                                     |                                                                                                |
|                            |                 |                                |                               | Bivariate correlations                     | Percent less than a high school diploma                                                                                               |                                                                                               |                                               | Count of tobacco retailers per 10 miles of roadway                                                                                                 | ES9: 0.146                                                                                                                                                      |                                                                                                |
| Caryl 2021 <sup>6</sup>    | Cross-Sectional | Scotland<br><br>United Kingdom | Data zones (N=6,976)          | Regressions to mean tobacco outlet density | Scottish Government’s Scottish Index of Multiple Deprivation (2016)                                                                   | Register of Tobacco and Nicotine Vapour Product Retailers (2016)                              | N=9,030<br><br>All tobacco retailers          | Kernel density estimation (100x100 meter grids; 800 meter radius of each cell): count of tobacco outlets per 1,000 population per square kilometer | ES1:<br><br>Most deprived: 12.055<br>Least deprived: 4.627<br><br>Slope Index of Inequality: -1.486<br>Relative Index of Inequality: 2.605<br><br>p=0.000       | 2: Yes<br>11: Yes<br>13: Yes<br><br>18: Yes<br>20: Yes<br><br>NA1: Yes<br>NA2: Yes<br>Total: 7 |
| Chaito n 2013 <sup>7</sup> | Cross-sectional | Ontario<br><br>Canada          | Dissemination area (N=18,922) | Logistic regression                        | Canadian Census (2006)<br>• Neighborhood deprivation index (Percentage age 25+ without high school graduation; Percentage lone parent | Ontario Ministry of Health and Long-Term Care Tobacco Information System database (June 2011) | N = 11,113<br><br>All tobacco retailers       | Count of tobacco retailers per 1,000 people over age 15                                                                                            | No unadjusted effect sizes reported.<br><br>“Tobacco outlets were more likely to be located in areas that had high neighbourhood deprivation, in both rural and | 2: Yes<br>11: Yes<br>13: Yes<br><br>18: Yes<br>20: Yes                                         |

**Notes:** We used a modified Downs and Black checklist to assess the risk of bias (see online repository protocol). We created a risk of bias index (0-7, with higher numbers indicating higher risk of bias) and *a priori* planned to exclude any studies with a score of 4 or higher (none were excluded).

*Italicized records* represent records or effect sizes that were excluded from synthesis and analysis because they 1) were combined with another record or 2) only reported adjusted effect sizes.

<sup>\*</sup>These two studies used similar methods to examine identical relationships with the same data, so only the first published study was included for analysis

ES=Effect Size

| Author (Year), ID        | Study Design             | Study Location                                              | Unit of Analysis (N)                                                                      | Statistical Approach | Data Source (Year): Area-Level Sociodemographic Variable                                                                                                                                                                                                                                                                                                                                                 | Data Source (Year): Tobacco Retailers                                                                                                 | Number and Type of Tobacco Retailers Included | Area-Level Outcome Variable Operationalization                                                       | Unadjusted Effect Sizes                                                                                                                                                   | Risk of Bias                                                                                     |
|--------------------------|--------------------------|-------------------------------------------------------------|-------------------------------------------------------------------------------------------|----------------------|----------------------------------------------------------------------------------------------------------------------------------------------------------------------------------------------------------------------------------------------------------------------------------------------------------------------------------------------------------------------------------------------------------|---------------------------------------------------------------------------------------------------------------------------------------|-----------------------------------------------|------------------------------------------------------------------------------------------------------|---------------------------------------------------------------------------------------------------------------------------------------------------------------------------|--------------------------------------------------------------------------------------------------|
|                          |                          |                                                             |                                                                                           |                      | <i>families; Percentage of families receiving government transfer payments; Percentage 15+ unemployed; Percentage living below the low income cut off; Percentage of homes needing major repair</i> <ul style="list-style-type: none"><li>• <i>Percent immigrant population</i></li><li>• <i>Percent blue-collar workers</i></li></ul>                                                                   | <i>Supplemented with Yellow Pages online directory</i><br><br><i>Ground-truthed retailers to verify cigarette sales with clerk</i>    |                                               |                                                                                                      | <i>urban areas. Outlets were less likely to be located in areas with high immigrant populations in urban areas, with the reverse being true for rural areas.” p.7299</i>  | <i>NA1: Yes<br/>NA2: Yes<br/>Total: 7</i>                                                        |
| Chuang 2005 <sup>8</sup> | Cross-sectional (pooled) | Northern California (four cities, not specified)<br><br>USA | “Neighborhoods” defined by census tract, census block group, or combination of two (N=82) | Chi^2 tests          | Census (1980, 1990)<br><br>Calculated socioeconomic status score based on principal component analysis: percentage less than high school education, percentage blue collar workers, percentage unemployed, median annual family income, and median housing value (standardized by city)<br><br>Scores were summed and then tertiled based on distribution each year where higher scores represent higher | Business listing addresses from telephone books for the survey years (1979–1990 as part of Stanford heart disease prevention program) | N not specified<br><br>Convenience stores     | Count of convenience stores per square mile (Tertiled based on the distribution in each survey year) | ES1: Percentage of neighborhoods having a high density of convenience stores<br><br>Low SES: 47.6%<br>Middle SES: 39.8%<br>High SES: 12.6%<br><br>Chi^2 p-value (<0.0001) | 2: Yes<br><br>11: No<br>13: No<br><br>18: Yes<br>20: Yes<br><br>NA1: Yes<br>NA2: Yes<br>Total: 5 |

**Notes:** We used a modified Downs and Black checklist to assess the risk of bias (see online repository protocol). We created a risk of bias index (0-7, with higher numbers indicating higher risk of bias) and *a priori* planned to exclude any studies with a score of 4 or higher (none were excluded).

*Italicized records* represent records or effect sizes that were excluded from synthesis and analysis because they 1) were combined with another record or 2) only reported adjusted effect sizes.

<sup>†</sup>These two studies used similar methods to examine identical relationships with the same data, so only the first published study was included for analysis

ES=Effect Size



| Author (Year), ID              | Study Design    | Study Location                  | Unit of Analysis (N)    | Statistical Approach    | Data Source (Year): Area-Level Sociodemographic Variable                                                                | Data Source (Year): Tobacco Retailers                                                                                                                                    | Number and Type of Tobacco Retailers Included                                                                                                                              | Area-Level Outcome Variable Operationalization                                                                                         | Unadjusted Effect Sizes                                            | Risk of Bias                                                                                      |
|--------------------------------|-----------------|---------------------------------|-------------------------|-------------------------|-------------------------------------------------------------------------------------------------------------------------|--------------------------------------------------------------------------------------------------------------------------------------------------------------------------|----------------------------------------------------------------------------------------------------------------------------------------------------------------------------|----------------------------------------------------------------------------------------------------------------------------------------|--------------------------------------------------------------------|---------------------------------------------------------------------------------------------------|
|                                |                 |                                 |                         |                         | neighborhood socioeconomic status (SES)                                                                                 |                                                                                                                                                                          |                                                                                                                                                                            |                                                                                                                                        |                                                                    |                                                                                                   |
| Craig mile 2021 <sup>9</sup>   | Cross-sectional | Ohio<br>USA                     | Census tracts (N=2,937) | Negative binomial model | American Community Survey 5-year Estimates (2016)<br><br>'High' vs. 'Low' prevalence of African-Americans (15% cut-off) | Active licensed cigarette retailers: Ohio's county auditor offices (fall of 2017)<br><br>Hookah cafes and vape shops: Internet directories (e.g., Yelp, Yellowpages.com) | N=11,389<br><br>Tobacco retailers (n=11,065 retailers with cigarette licenses; n=327 vape/hookah stores. Note: 3 retailers excluded from analysis, but type not specified) | Mean log count of tobacco retailers per 1000 people (adding one to the retailer count to guard against taking the log of a zero count) | ES4: Rate Ratio: 1.12<br><br>No statistical significance reported. | 2: Yes<br><br>11: Yes<br>13: No<br><br>18: Yes<br>20: Yes<br><br>NA1: Yes<br>NA2: Yes<br>Total: 6 |
|                                |                 |                                 |                         | Negative binomial model | 'High' vs. 'Low' prevalence of Hispanics (15% cut-off)                                                                  |                                                                                                                                                                          |                                                                                                                                                                            |                                                                                                                                        | ES5: Rate Ratio: 1.19<br><br>No statistical significance reported. |                                                                                                   |
| D'Alesandro 2016 <sup>10</sup> | Cross-sectional | King County (Washington)<br>USA | Census tract (N=397)    | Pearson correlation     | 5-Year American Community Survey (2010-2014)<br><br>Median household income                                             | Washington State Department of Health tobacco retail list (2015)                                                                                                         | N=1,865<br><br>All tobacco outlets                                                                                                                                         | Count of tobacco retailers per 1,000 people                                                                                            | ES1: r: -0.39, p<0.001                                             | 2: Yes<br><br>11: Yes<br>13: No<br><br>18: Yes<br>20: Yes<br><br>NA1: Yes<br>NA2: Yes<br>Total: 6 |
|                                |                 |                                 |                         |                         | Percent of the population with a high school degree or higher                                                           |                                                                                                                                                                          |                                                                                                                                                                            | Count of tobacco retailers per 1,000 people                                                                                            | ES2: r: -0.26, p<0.001                                             |                                                                                                   |

**Notes:** We used a modified Downs and Black checklist to assess the risk of bias (see online repository protocol). We created a risk of bias index (0-7, with higher numbers indicating higher risk of bias) and *a priori* planned to exclude any studies with a score of 4 or higher (none were excluded).

*Italicized records* represent records or effect sizes that were excluded from synthesis and analysis because they 1) were combined with another record or 2) only reported adjusted effect sizes.

<sup>\*</sup>These two studies used similar methods to examine identical relationships with the same data, so only the first published study was included for analysis

ES=Effect Size

| Author (Year), ID            | Study Design    | Study Location                         | Unit of Analysis (N)            | Statistical Approach            | Data Source (Year): Area-Level Sociodemographic Variable                                                                                                                                                                                                                                                                                                                                                   | Data Source (Year): Tobacco Retailers                                                                                                                                                                                                                                  | Number and Type of Tobacco Retailers Included                                | Area-Level Outcome Variable Operationalization | Unadjusted Effect Sizes                                                          | Risk of Bias                                                                                         |
|------------------------------|-----------------|----------------------------------------|---------------------------------|---------------------------------|------------------------------------------------------------------------------------------------------------------------------------------------------------------------------------------------------------------------------------------------------------------------------------------------------------------------------------------------------------------------------------------------------------|------------------------------------------------------------------------------------------------------------------------------------------------------------------------------------------------------------------------------------------------------------------------|------------------------------------------------------------------------------|------------------------------------------------|----------------------------------------------------------------------------------|------------------------------------------------------------------------------------------------------|
|                              |                 |                                        |                                 |                                 | Percentage of the population that identify as White                                                                                                                                                                                                                                                                                                                                                        |                                                                                                                                                                                                                                                                        |                                                                              | Count of tobacco retailers per 1,000 people    | ES3: r: -0.17, p<0.001                                                           |                                                                                                      |
|                              |                 |                                        |                                 |                                 | Percentage of the population that identify as African-American                                                                                                                                                                                                                                                                                                                                             |                                                                                                                                                                                                                                                                        |                                                                              | Count of tobacco retailers per 1,000 people    | ES4: r: 0.21, p<0.001                                                            |                                                                                                      |
|                              |                 |                                        |                                 |                                 | Percentage of the population that identify as Hispanic/Latino                                                                                                                                                                                                                                                                                                                                              |                                                                                                                                                                                                                                                                        |                                                                              | Count of tobacco retailers per 1,000 people    | ES5: r: 0.15, p<0.001                                                            |                                                                                                      |
| Dalglis h 2013 <sup>11</sup> | Cross-sectional | South-East Queensland<br><br>Australia | State suburbs (N not specified) | Pearson correlation coefficient | Australian Bureau of Statistics (ABS) Socioeconomic Indexes for Areas (SEIFA), Index of Relative Socio-economic Advantage and Disadvantage (IRSAD): relative measure of socioeconomic advantage “derived from various census measures including household income, occupation, internet connection and level of education attained” (p.372) where IRSAD decile 10=advantage and IRSAD decile 1=disadvantage | Ground-truthing (September and October 2010): “To collect the data, the auditor travelled systematically by foot through each of the survey areas and identified all retail outlets. The auditor then entered each outlet to establish if they sold cigarettes.” p.372 | N=56<br><br>Retailers that sold cigarettes (as confirmed by ground-truthing) | Count of tobacco retailers                     | ES1: r: 0.93, p=0.003                                                            | 2: Yes<br><br>11: No<br>13: No<br><br>18: Yes<br>20: Yes<br><br>NA1: Yes<br>NA2: Yes<br><br>Total: 5 |
| Duncan 2014 <sup>12</sup>    | Cross-sectional | Boston, Massachusetts<br><br>USA       | Census tract (N=167)            | Spearman correlation            | 2010 U.S. census race/ethnicity demographic estimates; 2006-2010 American Community Survey                                                                                                                                                                                                                                                                                                                 | Cigarette and Tobacco Excise Unit of the Commonwealth of Massachusetts’                                                                                                                                                                                                | N=1025<br><br>All licensed tobacco retailers                                 | Tobacco retailers per square kilometer         | ES1: Continuous: R <sub>s</sub> : -0.1050, p=0.1770, spatially adjusted p=0.4512 | 2: Yes<br><br>11: Yes<br>13: No                                                                      |

**Notes:** We used a modified Downs and Black checklist to assess the risk of bias (see online repository protocol). We created a risk of bias index (0-7, with higher numbers indicating higher risk of bias) and *a priori* planned to exclude any studies with a score of 4 or higher (none were excluded).

*Italicized records* represent records or effect sizes that were excluded from synthesis and analysis because they 1) were combined with another record or 2) only reported adjusted effect sizes.

<sup>†</sup>These two studies used similar methods to examine identical relationships with the same data, so only the first published study was included for analysis

ES=Effect Size

| Author (Year), ID | Study Design | Study Location | Unit of Analysis (N) | Statistical Approach   | Data Source (Year): Area-Level Sociodemographic Variable                                                                                                                       | Data Source (Year): Tobacco Retailers                                     | Number and Type of Tobacco Retailers Included | Area-Level Outcome Variable Operationalization                                                                  | Unadjusted Effect Sizes                                                                                                                                                    | Risk of Bias                                                   |
|-------------------|--------------|----------------|----------------------|------------------------|--------------------------------------------------------------------------------------------------------------------------------------------------------------------------------|---------------------------------------------------------------------------|-----------------------------------------------|-----------------------------------------------------------------------------------------------------------------|----------------------------------------------------------------------------------------------------------------------------------------------------------------------------|----------------------------------------------------------------|
|                   |              |                |                      |                        | estimates of federal poverty level<br><br>% non-Hispanic black residents (continuous; categorical as “predominantly black neighborhoods” for tracts with >60% black residents) | Department of Revenue tobacco retailer list (October 2010-September 2012) |                                               |                                                                                                                 | ES4: Categorical: Rs: -0.0562, p=0.4703, spatially adjusted p=0.6232                                                                                                       | 18: Yes<br>20: Yes<br><br>NA1: Yes<br>NA2: Yes<br><br>Total: 6 |
|                   |              |                |                      | Spatial lag regression | % non-Hispanic black residents (continuous; categorical as “predominantly black neighborhoods” for tracts with >60% black residents)                                           |                                                                           |                                               | Tobacco retailers per square kilometer (natural logarithm transformation with a transformation offset of 0.001) | ES7: Continuous: Coefficient: 0.003, SE: 0.007, p=0.640<br><br>ES10: Categorical: Coefficient: 0.203, SE: 0.527, p=0.701                                                   |                                                                |
|                   |              |                |                      | Spearman correlation   | Percentage of Hispanic residents (continuous; categorical as “predominantly Hispanic neighborhoods” for tracts with >60% Hispanic residents)                                   |                                                                           |                                               | Tobacco retailers per square kilometer                                                                          | ES2: Continuous: Rs: 0.0312, p=0.6889, spatially adjusted p=0.8018<br><br>ES5: Categorical: Rs: 0.2005, p=0.0094, spatially adjusted=not applicable, could not be computed |                                                                |
|                   |              |                |                      | Spatial lag regression | Percentage of Hispanic residents (continuous; categorical as “predominantly Hispanic neighborhoods” for tracts with >60% Hispanic residents)                                   |                                                                           |                                               | Tobacco retailers per square kilometer (natural logarithm transformation with a transformation offset of 0.001) | ES8: Continuous: Coefficient: 0.009, SE: 0.012, p=0.432<br><br>ES11: Categorical: Coefficient: 1.270, SE: 1.007, p=0.207                                                   |                                                                |
|                   |              |                |                      | Spearman correlation   | Percentage of families below the federal poverty level (continuous;                                                                                                            |                                                                           |                                               | Tobacco retailers per square kilometer                                                                          | ES3: Continuous: Rs: 0.1322, p=0.0884, spatially adjusted p=0.2048                                                                                                         |                                                                |

**Notes:** We used a modified Downs and Black checklist to assess the risk of bias (see online repository protocol). We created a risk of bias index (0-7, with higher numbers indicating higher risk of bias) and *a priori* planned to exclude any studies with a score of 4 or higher (none were excluded).  
*Italicized records* represent records or effect sizes that were excluded from synthesis and analysis because they 1) were combined with another record or 2) only reported adjusted effect sizes.  
\*These two studies used similar methods to examine identical relationships with the same data, so only the first published study was included for analysis  
ES=Effect Size

| Author (Year), ID          | Study Design    | Study Location                                                            | Unit of Analysis (N)   | Statistical Approach         | Data Source (Year): Area-Level Sociodemographic Variable                                                                                                                    | Data Source (Year): Tobacco Retailers        | Number and Type of Tobacco Retailers Included                              | Area-Level Outcome Variable Operationalization                                                                  | Unadjusted Effect Sizes                                                                                                                                                                                                                                                                                                                                                                                                                                                                                                                                                                               | Risk of Bias                                                                                      |
|----------------------------|-----------------|---------------------------------------------------------------------------|------------------------|------------------------------|-----------------------------------------------------------------------------------------------------------------------------------------------------------------------------|----------------------------------------------|----------------------------------------------------------------------------|-----------------------------------------------------------------------------------------------------------------|-------------------------------------------------------------------------------------------------------------------------------------------------------------------------------------------------------------------------------------------------------------------------------------------------------------------------------------------------------------------------------------------------------------------------------------------------------------------------------------------------------------------------------------------------------------------------------------------------------|---------------------------------------------------------------------------------------------------|
|                            |                 |                                                                           |                        |                              | categorical as “high-poverty neighborhoods” for tracts with at least 20% of families living in poverty)                                                                     |                                              |                                                                            |                                                                                                                 | ES6: Categorical: $R_s$ : -0.1279, $p=0.0995$ , spatially adjusted $p=0.1377$                                                                                                                                                                                                                                                                                                                                                                                                                                                                                                                         |                                                                                                   |
|                            |                 |                                                                           |                        | Spatial lag regression       | Percentage of families below the federal poverty level (continuous; categorical as “high-poverty neighborhoods” for tracts with at least 20% of families living in poverty) |                                              |                                                                            | Tobacco retailers per square kilometer (natural logarithm transformation with a transformation offset of 0.001) | ES9: Continuous: Coefficient: 0.002, SE: 0.012, $p=0.841$<br><br>ES12: Categorical: Coefficient: 0.213, SE: 0.371, $p=0.566$                                                                                                                                                                                                                                                                                                                                                                                                                                                                          |                                                                                                   |
| Fakunle 2010 <sup>13</sup> | Cross-sectional | Stratified analyses for Bergen and Salem Counties (New Jersey)<br><br>USA | Census tract (N=1,938) | Analysis of Variance (ANOVA) | Census (2000)<br><br>Median household income (quartiles)                                                                                                                    | New Jersey Department of the Treasury (2004) | N=13,984<br><br>All retailers licensed to sell tobacco as a retail product | Count of tobacco retailers per 10 kilometers of roadway                                                         | ES1: Salem County<br>Q1: <\$37,235 ( $\mu$ : 3.64)<br>Q2: <\$47,793 ( $\mu$ : 1.36)<br>Q3: <\$53,516 ( $\mu$ : 0.47)<br>Q4: >/\$53,516 ( $\mu$ : 0.24)<br>F[3,20]=8.03, $p<0.01$<br><br>ES2: Bergen County<br>Q1: <\$51,159 ( $\mu$ : 8.52)<br>Q2: <\$67,000 ( $\mu$ : 3.85)<br>Q3: <\$85,351 ( $\mu$ : 2.32)<br>Q4: >/\$85,351 ( $\mu$ : 0.87)<br>F[3,159]=56.49, $p<0.001$<br><br>Post-hoc Tukey tests were used to examine pairwise differences among the means but effect sizes were not reported.<br><br>Salem County: “The tests revealed that...the first quartile for median household income | 2: Yes<br><br>11: Yes<br>13: No<br><br>18: Yes<br>20: Yes<br><br>NA1: Yes<br>NA2: Yes<br>Total: 6 |

**Notes:** We used a modified Downs and Black checklist to assess the risk of bias (see online repository protocol). We created a risk of bias index (0-7, with higher numbers indicating higher risk of bias) and *a priori* planned to exclude any studies with a score of 4 or higher (none were excluded).

*Italicized records* represent records or effect sizes that were excluded from synthesis and analysis because they 1) were combined with another record or 2) only reported adjusted effect sizes.

<sup>\*</sup>These two studies used similar methods to examine identical relationships with the same data, so only the first published study was included for analysis

ES=Effect Size

| Author (Year), ID | Study Design | Study Location | Unit of Analysis (N) | Statistical Approach | Data Source (Year): Area-Level Sociodemographic Variable | Data Source (Year): Tobacco Retailers | Number and Type of Tobacco Retailers Included | Area-Level Outcome Variable Operationalization | Unadjusted Effect Sizes                                                                                                                                                                                                                                                                                                                                                                                                                                                                                                                                         | Risk of Bias |
|-------------------|--------------|----------------|----------------------|----------------------|----------------------------------------------------------|---------------------------------------|-----------------------------------------------|------------------------------------------------|-----------------------------------------------------------------------------------------------------------------------------------------------------------------------------------------------------------------------------------------------------------------------------------------------------------------------------------------------------------------------------------------------------------------------------------------------------------------------------------------------------------------------------------------------------------------|--------------|
|                   |              |                |                      |                      |                                                          |                                       |                                               |                                                | (signifying the lowest 25% of median household incomes) had significantly higher tobacco outlet [density] than the other three quartiles” (p. 253).<br><br>Bergen County: “The first quartile for median household income had a significantly higher tobacco outlet density than the other three quartiles” (p. 255).                                                                                                                                                                                                                                           |              |
|                   |              |                |                      |                      | Percentage of African American residents (quartiles)     |                                       |                                               |                                                | ES3: Salem County<br>Q1: </=1.53% (μ: 1.20)<br>Q2: >1.53% (μ: 0.29)<br>Q3: >11.50% (μ: 0.66)<br>Q4: >23.56% (μ: 3.56)<br>F[3,20]=6.36, p<0.01<br><br>ES4: Bergen County<br>Q1: </=0.49% (μ: 2.63)<br>Q2: >0.49% (μ: 3.49)<br>Q3: >1.17% (μ: 4.10)<br>Q4: >3.35% (μ: 5.17)<br><br>F[3,159]=3.03, p<0.05<br><br>Post-hoc Tukey tests were used to examine pairwise differences among the means but effect sizes were not reported.<br><br>Salem County: “The tests revealed that the fourth quartile for African American population percentage...(signifying the |              |

**Notes:** We used a modified Downs and Black checklist to assess the risk of bias (see online repository protocol). We created a risk of bias index (0-7, with higher numbers indicating higher risk of bias) and *a priori* planned to exclude any studies with a score of 4 or higher (none were excluded).

*Italicized records* represent records or effect sizes that were excluded from synthesis and analysis because they 1) were combined with another record or 2) only reported adjusted effect sizes.

\*These two studies used similar methods to examine identical relationships with the same data, so only the first published study was included for analysis

ES=Effect Size

| Author (Year), ID | Study Design | Study Location | Unit of Analysis (N) | Statistical Approach | Data Source (Year): Area-Level Sociodemographic Variable | Data Source (Year): Tobacco Retailers | Number and Type of Tobacco Retailers Included | Area-Level Outcome Variable Operationalization | Unadjusted Effect Sizes                                                                                                                                                                                                                                                                                                                                                                                                                                                                                                                                                                                         | Risk of Bias |
|-------------------|--------------|----------------|----------------------|----------------------|----------------------------------------------------------|---------------------------------------|-----------------------------------------------|------------------------------------------------|-----------------------------------------------------------------------------------------------------------------------------------------------------------------------------------------------------------------------------------------------------------------------------------------------------------------------------------------------------------------------------------------------------------------------------------------------------------------------------------------------------------------------------------------------------------------------------------------------------------------|--------------|
|                   |              |                |                      |                      |                                                          |                                       |                                               |                                                | highest 25% of population percentages)...had significantly higher tobacco outlet [density] than the other three quartiles” (p. 253).<br><br>Bergen County: “The fourth quartile’s tobacco outlet density was only significantly higher than that of the first quartile” (p. 255).                                                                                                                                                                                                                                                                                                                               |              |
|                   |              |                |                      |                      | Percentage of Latino residents (quartiles)               |                                       |                                               |                                                | ES5: Salem County<br>Q1: </=1.37% (μ: 0.98)<br>Q2: >1.37% (μ: 0.56)<br>Q3: >2.33% (μ: 0.52)<br>Q4: >4.58% (μ: 3.64)<br>F[3,20]=6.77, p<0.01<br><br>ES6: Bergen County<br>Q1: </=4.17% (μ: 0.86)<br>Q2: >4.17% (μ: 2.84)<br>Q3: >8.16% (μ: 4.94)<br>Q4: >13.71% (μ: 6.77)<br>F[3,159]=23.89, p<0.001<br><br>Post-hoc Tukey tests were used to examine pairwise differences among the means but effect sizes were not reported.<br><br>Salem County: “The tests revealed that the fourth quartile for...Latino population percentage...(signifying the highest 25% of population percentages)...had significantly |              |

**Notes:** We used a modified Downs and Black checklist to assess the risk of bias (see online repository protocol). We created a risk of bias index (0-7, with higher numbers indicating higher risk of bias) and *a priori* planned to exclude any studies with a score of 4 or higher (none were excluded).

*Italicized records* represent records or effect sizes that were excluded from synthesis and analysis because they 1) were combined with another record or 2) only reported adjusted effect sizes.

\*These two studies used similar methods to examine identical relationships with the same data, so only the first published study was included for analysis

ES=Effect Size

| Author (Year), ID          | Study Design    | Study Location                                                                          | Unit of Analysis (N)                                                                                                                                                        | Statistical Approach                                                                                                                                                                    | Data Source (Year): Area-Level Sociodemographic Variable                                                                                                         | Data Source (Year): Tobacco Retailers      | Number and Type of Tobacco Retailers Included                      | Area-Level Outcome Variable Operationalization | Unadjusted Effect Sizes                                                                                                                                                                                                           | Risk of Bias                                                                                      |
|----------------------------|-----------------|-----------------------------------------------------------------------------------------|-----------------------------------------------------------------------------------------------------------------------------------------------------------------------------|-----------------------------------------------------------------------------------------------------------------------------------------------------------------------------------------|------------------------------------------------------------------------------------------------------------------------------------------------------------------|--------------------------------------------|--------------------------------------------------------------------|------------------------------------------------|-----------------------------------------------------------------------------------------------------------------------------------------------------------------------------------------------------------------------------------|---------------------------------------------------------------------------------------------------|
|                            |                 |                                                                                         |                                                                                                                                                                             |                                                                                                                                                                                         |                                                                                                                                                                  |                                            |                                                                    |                                                | higher tobacco outlet [density] than the other three quartiles” (p. 253).<br><br>Bergen County: “The fourth quartile’s tobacco outlet density was only significantly higher than that of the first and second quartile” (p. 255). |                                                                                                   |
| Fakunle 2016 <sup>14</sup> | Cross-sectional | Stratified analyses for Baltimore City and Prince George’s County (Maryland)<br><br>USA | Census tracts (Baltimore City, N=198; Prince George’s County, N=218)<br><br>Counties described as “...similar racial concentrations yet differing income levels...” (p. 35) | T-test<br><br>Also reports interaction between counties and each sociodemographic variable (i.e., median household income, % Black, % Hispanic, % with less than a high school diploma) | Decennial Census (2010), population data for outcome variable<br><br>American Community Survey (2007-2011), sociodemographic data<br><br>Median household income | Maryland Judiciary Business License (2013) | N not specified.<br><br>All retailers with permit to sell tobacco. | Count of tobacco retailers per 1,000 people    | ES2: Baltimore City: $\beta$ : -0.022, p=0.004<br><br>ES6: Prince George’s County: $\beta$ : -0.009, p=0.001                                                                                                                      | 2: Yes<br><br>11: Yes<br>13: No<br><br>18: Yes<br>20: Yes<br><br>NA1: Yes<br>NA2: Yes<br>Total: 6 |
|                            |                 |                                                                                         |                                                                                                                                                                             | Spatial lag regression                                                                                                                                                                  | % Black                                                                                                                                                          |                                            |                                                                    |                                                | ES3: Baltimore City: $\beta$ : 0.001, p=0.001<br><br>ES7: Prince George’s County: $\beta$ : 0.001, p=0.001                                                                                                                        |                                                                                                   |
|                            |                 |                                                                                         |                                                                                                                                                                             | Spatial lag regression                                                                                                                                                                  | % Hispanic                                                                                                                                                       |                                            |                                                                    |                                                | ES4: Baltimore City: $\beta$ : 0.024, p=0.355<br><br>ES8: Prince George’s County: $\beta$ : 0.004, p=0.929                                                                                                                        |                                                                                                   |

**Notes:** We used a modified Downs and Black checklist to assess the risk of bias (see online repository protocol). We created a risk of bias index (0-7, with higher numbers indicating higher risk of bias) and *a priori* planned to exclude any studies with a score of 4 or higher (none were excluded).

*Italicized records* represent records or effect sizes that were excluded from synthesis and analysis because they 1) were combined with another record or 2) only reported adjusted effect sizes.

<sup>\*</sup>These two studies used similar methods to examine identical relationships with the same data, so only the first published study was included for analysis

ES=Effect Size

| Author (Year), ID          | Study Design    | Study Location                                                                                                                                                                                                                                                      | Unit of Analysis (N)                                                                                        | Statistical Approach           | Data Source (Year): Area-Level Sociodemographic Variable                                                     | Data Source (Year): Tobacco Retailers        | Number and Type of Tobacco Retailers Included                                                                      | Area-Level Outcome Variable Operationalization | Unadjusted Effect Sizes                                                                                                                                                                                                                                                                                                                                                                                                                                                                                                                                                                                                                                                       | Risk of Bias                                                                                      |
|----------------------------|-----------------|---------------------------------------------------------------------------------------------------------------------------------------------------------------------------------------------------------------------------------------------------------------------|-------------------------------------------------------------------------------------------------------------|--------------------------------|--------------------------------------------------------------------------------------------------------------|----------------------------------------------|--------------------------------------------------------------------------------------------------------------------|------------------------------------------------|-------------------------------------------------------------------------------------------------------------------------------------------------------------------------------------------------------------------------------------------------------------------------------------------------------------------------------------------------------------------------------------------------------------------------------------------------------------------------------------------------------------------------------------------------------------------------------------------------------------------------------------------------------------------------------|---------------------------------------------------------------------------------------------------|
|                            |                 |                                                                                                                                                                                                                                                                     |                                                                                                             | Spatial lag regression         | % with less than a high school diploma                                                                       |                                              |                                                                                                                    |                                                | ES5: Baltimore City: $\beta$ : 0.079, $p=0.069$<br><br>ES9: Prince George's County: $\beta$ : 0.040, $p=0.069$                                                                                                                                                                                                                                                                                                                                                                                                                                                                                                                                                                |                                                                                                   |
| Fakunle 2019 <sup>15</sup> | Cross-sectional | Stratified analyses for Baltimore County, Howard County, Montgomery County, Lower Eastern Shore (Dorchester County, Somerset County, Wicomico County, Worcester County), Western Maryland (Allegany County, Garret County, Washington County) (Maryland)<br><br>USA | Census tract (N dependent on model)<br><br>Counties described as "...similar White populations..." (p. 409) | Spatial lag Poisson regression | American Community Survey (2011-2015)<br><br>Percentage of individuals who identify as White (scaled to 10%) | Maryland State Licensing Bureau (April 2017) | N=2,827<br><br>All retailers with active cigarette, special cigarette, or other tobacco product or tobacco license | Count of tobacco retailers per 1000 people     | Baltimore County (N=211)<br>ES1: Exponentiated B: 1.02, $p<0.001$<br>ES2: Spatially lagged exponentiated B: 0.96, $p<0.001$<br><br>Howard County (N=55)<br>ES13: Exponentiated B: 0.87, $p<0.001$<br>ES14: Spatially lagged exponentiated B: 1.02, $p<0.001$<br><br>Lower Eastern Shore (N=50)<br>ES25: Exponentiated B: 1.24, $p<0.001$<br>ES26: Spatially lagged exponentiated B: 1.44, $p<0.001$<br><br>Montgomery County (N=215)<br>ES37: Exponentiated B: 1.00, $p=0.003$<br>ES38: Spatially lagged exponentiated B: 0.97, $p<0.001$<br><br>Western Maryland (N=62)<br>ES49: Exponentiated B: 1.13, $p<0.001$<br>ES50: Spatially lagged exponentiated B: 0.93, $p<0.001$ | 2: Yes<br><br>11: Yes<br>13: No<br><br>18: Yes<br>20: Yes<br><br>NA1: Yes<br>NA2: Yes<br>Total: 6 |

**Notes:** We used a modified Downs and Black checklist to assess the risk of bias (see online repository protocol). We created a risk of bias index (0-7, with higher numbers indicating higher risk of bias) and *a priori* planned to exclude any studies with a score of 4 or higher (none were excluded).

*Italicized records* represent records or effect sizes that were excluded from synthesis and analysis because they 1) were combined with another record or 2) only reported adjusted effect sizes.

<sup>\*</sup>These two studies used similar methods to examine identical relationships with the same data, so only the first published study was included for analysis

ES=Effect Size



| Author (Year), ID | Study Design | Study Location | Unit of Analysis (N) | Statistical Approach | Data Source (Year): Area-Level Sociodemographic Variable                                              | Data Source (Year): Tobacco Retailers | Number and Type of Tobacco Retailers Included | Area-Level Outcome Variable Operationalization | Unadjusted Effect Sizes                                                                                                                                                                                                                                                                                                                                                                                                                                                                                                                                                                                                                                   | Risk of Bias |
|-------------------|--------------|----------------|----------------------|----------------------|-------------------------------------------------------------------------------------------------------|---------------------------------------|-----------------------------------------------|------------------------------------------------|-----------------------------------------------------------------------------------------------------------------------------------------------------------------------------------------------------------------------------------------------------------------------------------------------------------------------------------------------------------------------------------------------------------------------------------------------------------------------------------------------------------------------------------------------------------------------------------------------------------------------------------------------------------|--------------|
|                   |              |                |                      |                      | Median household income (scaled to \$10,000 and expressed in 2015 inflation-adjusted dollars)         |                                       |                                               |                                                | Baltimore County (N=211)<br>ES3: Exponentiated B: 0.93, p<0.001<br>ES4: Spatially lagged exponentiated B: 0.79, p<0.001<br><br>Howard County (N=55)<br>ES15: Exponentiated B: 0.95, p<0.001<br>ES16: Spatially lagged exponentiated B: 1.09, p<0.001<br><br>Lower Eastern Shore (N=50)<br>ES27: Exponentiated B: 1.00, p<0.001<br>ES28: Spatially lagged exponentiated B: 1.07, p<0.001<br><br>Montgomery County (N=215)<br>ES39: Exponentiated B: 0.94, p<0.001<br>ES40: Spatially lagged exponentiated B: 0.92, p<0.001<br><br>Western Maryland (N=62)<br>ES51: Exponentiated B: 0.85, p<0.001<br>ES52: Spatially lagged exponentiated B: 0.90, p<0.001 |              |
|                   |              |                |                      |                      | Percentage of individuals 25 years and over who obtained at least a Bachelor's degree (scaled to 10%) |                                       |                                               |                                                | Baltimore County (N=211)<br>ES5: Exponentiated B: 0.85, p<0.001<br>ES6: Spatially lagged exponentiated B: 0.82, p<0.001<br><br>Howard County (N=55)                                                                                                                                                                                                                                                                                                                                                                                                                                                                                                       |              |

**Notes:** We used a modified Downs and Black checklist to assess the risk of bias (see online repository protocol). We created a risk of bias index (0-7, with higher numbers indicating higher risk of bias) and *a priori* planned to exclude any studies with a score of 4 or higher (none were excluded).

*Italicized records* represent records or effect sizes that were excluded from synthesis and analysis because they 1) were combined with another record or 2) only reported adjusted effect sizes.

\*These two studies used similar methods to examine identical relationships with the same data, so only the first published study was included for analysis

ES=Effect Size

| Author (Year), ID | Study Design | Study Location | Unit of Analysis (N) | Statistical Approach | Data Source (Year): Area-Level Sociodemographic Variable                                         | Data Source (Year): Tobacco Retailers | Number and Type of Tobacco Retailers Included | Area-Level Outcome Variable Operationalization | Unadjusted Effect Sizes                                                                                                                                                                                                                                                                                                                                                                                                                                                                            | Risk of Bias |
|-------------------|--------------|----------------|----------------------|----------------------|--------------------------------------------------------------------------------------------------|---------------------------------------|-----------------------------------------------|------------------------------------------------|----------------------------------------------------------------------------------------------------------------------------------------------------------------------------------------------------------------------------------------------------------------------------------------------------------------------------------------------------------------------------------------------------------------------------------------------------------------------------------------------------|--------------|
|                   |              |                |                      |                      |                                                                                                  |                                       |                                               |                                                | ES17: Exponentiated B: 0.96, p<0.001<br>ES18: Spatially lagged exponentiated B: 0.83, p<0.001<br><br>Lower Eastern Shore (N=50)<br>ES29: Exponentiated B: 1.32, p<0.001<br>ES30: Spatially lagged exponentiated B: 1.81, p<0.001<br><br>Montgomery County (N=215)<br>ES41: Exponentiated B: 1.05, p<0.001<br>ES42: Spatially lagged exponentiated B: 0.96, p<0.001<br><br>Western Maryland (N=62)<br>ES53: Exponentiated B: 0.94, p<0.001<br>ES54: Spatially lagged exponentiated B: 0.69, p<0.001 |              |
|                   |              |                |                      |                      | Percentage of individuals 16 years and older who are actively in the labor force (scaled to 10%) |                                       |                                               |                                                | Baltimore County (N=211)<br>ES7: Exponentiated B: 0.93, p<0.001<br>ES8: Spatially lagged exponentiated B: 0.68, p<0.001<br><br>Howard County (N=55)<br>ES19: Exponentiated B: 0.69, p<0.001<br>ES20: Spatially lagged exponentiated B: 0.95, p<0.001<br><br>Lower Eastern Shore (N=50)                                                                                                                                                                                                             |              |

**Notes:** We used a modified Downs and Black checklist to assess the risk of bias (see online repository protocol). We created a risk of bias index (0-7, with higher numbers indicating higher risk of bias) and *a priori* planned to exclude any studies with a score of 4 or higher (none were excluded).

*Italicized records* represent records or effect sizes that were excluded from synthesis and analysis because they 1) were combined with another record or 2) only reported adjusted effect sizes.

\*These two studies used similar methods to examine identical relationships with the same data, so only the first published study was included for analysis

ES=Effect Size

| Author (Year), ID | Study Design | Study Location | Unit of Analysis (N) | Statistical Approach | Data Source (Year): Area-Level Sociodemographic Variable | Data Source (Year): Tobacco Retailers | Number and Type of Tobacco Retailers Included | Area-Level Outcome Variable Operationalization | Unadjusted Effect Sizes                                                                                                                                                                                                                                                                                                                                                                                                   | Risk of Bias |
|-------------------|--------------|----------------|----------------------|----------------------|----------------------------------------------------------|---------------------------------------|-----------------------------------------------|------------------------------------------------|---------------------------------------------------------------------------------------------------------------------------------------------------------------------------------------------------------------------------------------------------------------------------------------------------------------------------------------------------------------------------------------------------------------------------|--------------|
|                   |              |                |                      |                      |                                                          |                                       |                                               |                                                | ES31: Exponentiated B: 1.00, p=0.61<br>ES32: Spatially lagged exponentiated B: 0.91, p<0.001<br><br>Montgomery County (N=215)<br>ES43: Exponentiated B: 1.04, p<0.001<br>ES44: Spatially lagged exponentiated B: 2.19, p<0.001<br><br>Western Maryland (N=62)<br>ES55: Exponentiated B: 1.00, p=0.92<br>ES56: Spatially lagged exponentiated B: 0.73, p<0.001                                                             |              |
|                   |              |                |                      |                      | Gini index of income inequality (scaled to 1%)           |                                       |                                               |                                                | Baltimore County (N=211)<br>ES9: Exponentiated B: 1.02, p<0.001<br>ES10: Spatially lagged exponentiated B: 0.97, p<0.001<br><br>Howard County (N=55)<br>ES21: Exponentiated B: 1.01, p<0.001<br>ES22: Spatially lagged exponentiated B: 2.40, p<0.001<br><br>Lower Eastern Shore (N=50)<br>ES33: Exponentiated B: 1.20, p<0.001<br>ES34: Spatially lagged exponentiated B: 1.12, p<0.001<br><br>Montgomery County (N=215) |              |

**Notes:** We used a modified Downs and Black checklist to assess the risk of bias (see online repository protocol). We created a risk of bias index (0-7, with higher numbers indicating higher risk of bias) and *a priori* planned to exclude any studies with a score of 4 or higher (none were excluded).

*Italicized records* represent records or effect sizes that were excluded from synthesis and analysis because they 1) were combined with another record or 2) only reported adjusted effect sizes.

\*These two studies used similar methods to examine identical relationships with the same data, so only the first published study was included for analysis

ES=Effect Size

| Author (Year), ID | Study Design | Study Location | Unit of Analysis (N) | Statistical Approach | Data Source (Year): Area-Level Sociodemographic Variable   | Data Source (Year): Tobacco Retailers | Number and Type of Tobacco Retailers Included | Area-Level Outcome Variable Operationalization | Unadjusted Effect Sizes                                                                                                                                                                                                                                                                                                                                                                                                                                                                                                                                    | Risk of Bias |
|-------------------|--------------|----------------|----------------------|----------------------|------------------------------------------------------------|---------------------------------------|-----------------------------------------------|------------------------------------------------|------------------------------------------------------------------------------------------------------------------------------------------------------------------------------------------------------------------------------------------------------------------------------------------------------------------------------------------------------------------------------------------------------------------------------------------------------------------------------------------------------------------------------------------------------------|--------------|
|                   |              |                |                      |                      |                                                            |                                       |                                               |                                                | ES45: Exponentiated B: 1.05, p<0.001<br>ES46: Spatially lagged exponentiated B: 1.04, p<0.001<br><br>Western Maryland (N=62)<br>ES57: Exponentiated B: 1.03, p<0.001<br>ES58: Spatially lagged exponentiated B: 1.05, p<0.001                                                                                                                                                                                                                                                                                                                              |              |
|                   |              |                |                      |                      | Total number of vacant housing units (scaled to 100 units) |                                       |                                               |                                                | Baltimore County (N=211)<br>ES11: Exponentiated B: 0.82, p<0.001<br>ES12: Spatially lagged exponentiated B: 1.48, p<0.001<br><br>Howard County (N=55)<br>ES23: Exponentiated B: 1.59, p<0.001<br>ES24: Spatially lagged exponentiated B: 0.93, p<0.001<br><br>Lower Eastern Shore (N=50)<br>ES35: Exponentiated B: 1.02, p<0.001<br>ES36: Spatially lagged exponentiated B: 1.04, p<0.001<br><br>Montgomery County (N=215)<br>ES47: Exponentiated B: 1.75, p<0.001<br>ES48: Spatially lagged exponentiated B: 2.30, p<0.001<br><br>Western Maryland (N=62) |              |

**Notes:** We used a modified Downs and Black checklist to assess the risk of bias (see online repository protocol). We created a risk of bias index (0-7, with higher numbers indicating higher risk of bias) and *a priori* planned to exclude any studies with a score of 4 or higher (none were excluded).

*Italicized records* represent records or effect sizes that were excluded from synthesis and analysis because they 1) were combined with another record or 2) only reported adjusted effect sizes.

\*These two studies used similar methods to examine identical relationships with the same data, so only the first published study was included for analysis

ES=Effect Size

| Author (Year), ID          | Study Design    | Study Location                                                                                                                                                                                                                                                      | Unit of Analysis (N)                                                                                                                                              | Statistical Approach           | Data Source (Year): Area-Level Sociodemographic Variable                                                     | Data Source (Year): Tobacco Retailers        | Number and Type of Tobacco Retailers Included                                                                                                 | Area-Level Outcome Variable Operationalization  | Unadjusted Effect Sizes                                                                                                                                              | Risk of Bias                                                                                      |
|----------------------------|-----------------|---------------------------------------------------------------------------------------------------------------------------------------------------------------------------------------------------------------------------------------------------------------------|-------------------------------------------------------------------------------------------------------------------------------------------------------------------|--------------------------------|--------------------------------------------------------------------------------------------------------------|----------------------------------------------|-----------------------------------------------------------------------------------------------------------------------------------------------|-------------------------------------------------|----------------------------------------------------------------------------------------------------------------------------------------------------------------------|---------------------------------------------------------------------------------------------------|
|                            |                 |                                                                                                                                                                                                                                                                     |                                                                                                                                                                   |                                |                                                                                                              |                                              |                                                                                                                                               |                                                 | ES59: Exponentiated B: 0.99, p<0.001<br>ES60: Spatially lagged exponentiated B: 0.99, p<0.001                                                                        |                                                                                                   |
| Fakunle 2021 <sup>16</sup> | Cross-sectional | Stratified analyses for Baltimore County, Howard County, Montgomery County, Lower Eastern Shore (Dorchester County, Somerset County, Wicomico County, Worcester County), Western Maryland (Allegany County, Garret County, Washington County) (Maryland)<br><br>USA | Census tract (N dependent on model)<br><br>“Areas with high-Black and high-White population percentages” with “similar magnitudes of socioeconomic status” (p. 4) | Spatial lag Poisson regression | American Community Survey (2011-2015)<br><br>Percentage of individuals who identify as White (scaled to 10%) | Maryland State Licensing Bureau (April 2017) | N=2,830<br><br>All retailers with active cigarette, special cigarette, or other tobacco product or tobaccoconist license as of April 30, 2017 | Count of tobacco retailers per 10 km of roadway | Only has unadjusted results reported for Western Maryland (N=62).<br><br>ES1: Exponentiated B: 0.72, p<0.001<br>ES2: Spatially lagged exponentiated B: 0.69, p<0.001 | 2: Yes<br><br>11: Yes<br>13: No<br><br>18: Yes<br>20: Yes<br><br>NA1: Yes<br>NA2: Yes<br>Total: 6 |
|                            |                 |                                                                                                                                                                                                                                                                     |                                                                                                                                                                   |                                | Median household income (scaled to                                                                           |                                              |                                                                                                                                               |                                                 | ES3: Exponentiated B: 0.84, p<0.001                                                                                                                                  |                                                                                                   |

**Notes:** We used a modified Downs and Black checklist to assess the risk of bias (see online repository protocol). We created a risk of bias index (0-7, with higher numbers indicating higher risk of bias) and *a priori* planned to exclude any studies with a score of 4 or higher (none were excluded).

*Italicized records* represent records or effect sizes that were excluded from synthesis and analysis because they 1) were combined with another record or 2) only reported adjusted effect sizes.

<sup>\*</sup>These two studies used similar methods to examine identical relationships with the same data, so only the first published study was included for analysis

ES=Effect Size

| Author (Year), ID               | Study Design    | Study Location                 | Unit of Analysis (N)               | Statistical Approach                             | Data Source (Year): Area-Level Sociodemographic Variable                                                                                                                                              | Data Source (Year): Tobacco Retailers                                                                                                                                                                                                                                           | Number and Type of Tobacco Retailers Included                                                                                        | Area-Level Outcome Variable Operationalization  | Unadjusted Effect Sizes                                                                                                                                                                                     | Risk of Bias                                                                                      |
|---------------------------------|-----------------|--------------------------------|------------------------------------|--------------------------------------------------|-------------------------------------------------------------------------------------------------------------------------------------------------------------------------------------------------------|---------------------------------------------------------------------------------------------------------------------------------------------------------------------------------------------------------------------------------------------------------------------------------|--------------------------------------------------------------------------------------------------------------------------------------|-------------------------------------------------|-------------------------------------------------------------------------------------------------------------------------------------------------------------------------------------------------------------|---------------------------------------------------------------------------------------------------|
|                                 |                 |                                |                                    |                                                  | \$10,000 and expressed in 2015 inflation-adjusted dollars)                                                                                                                                            |                                                                                                                                                                                                                                                                                 |                                                                                                                                      |                                                 | ES4: Spatially lagged exponentiated B: 0.90, p<0.001                                                                                                                                                        |                                                                                                   |
|                                 |                 |                                |                                    |                                                  | Percentage of individuals 25 years and over who obtained at least a Bachelor's degree (scaled to 10%)                                                                                                 |                                                                                                                                                                                                                                                                                 |                                                                                                                                      |                                                 | ES5: Exponentiated B: 1.04, p<0.001<br>ES6: Spatially lagged exponentiated B: 1.00, p=0.99                                                                                                                  |                                                                                                   |
|                                 |                 |                                |                                    |                                                  | Percentage of individuals 16 years and older who are actively in the labor force (scaled to 10%)                                                                                                      |                                                                                                                                                                                                                                                                                 |                                                                                                                                      |                                                 | ES7: Exponentiated B: 0.89, p<0.001<br>ES8: Spatially lagged exponentiated B: 1.10, p<0.001                                                                                                                 |                                                                                                   |
|                                 |                 |                                |                                    |                                                  | Gini index of income inequality (scaled to 1%)                                                                                                                                                        |                                                                                                                                                                                                                                                                                 |                                                                                                                                      |                                                 | ES9: Exponentiated B: 1.04, p<0.001<br>E10: Spatially lagged exponentiated B: 1.03, p<0.001                                                                                                                 |                                                                                                   |
|                                 |                 |                                |                                    |                                                  | Total number of vacant housing units (scaled to 100 units)                                                                                                                                            |                                                                                                                                                                                                                                                                                 |                                                                                                                                      |                                                 | ES11: Exponentiated B: 0.88, p<0.001<br>E12: Spatially lagged exponentiated B: 0.91, p<0.001                                                                                                                |                                                                                                   |
| Galiats atos 2018 <sup>17</sup> | Cross-sectional | Baltimore, Maryland<br><br>USA | Community statistical areas (N=55) | T-test comparing median tobacco retailer density | Neighborhood Health Profiles (2011); American Community Survey (2005-2009)<br><br>Median household income (dichotomized at 50 <sup>th</sup> percentile into Low Income [n=28] vs. High Income [n=27]) | Neighborhood Health Profiles (2011) which used data from the following sources: <ul style="list-style-type: none"><li>• Baltimore City Liquor Board</li><li>• Baltimore City Comptroller</li><li>• Baltimore Neighborhood Indicators Alliance from the Baltimore City</li></ul> | N not specified.<br><br>Establishments that sell cigarettes or other tobacco products as defined by Baltimore City Health Department | Count of tobacco retailers per 10,000 residents | ES1: Low income (median: 30.5, 25 <sup>th</sup> percentile: 19.7, 75 <sup>th</sup> percentile 44.9); high income (median: 16.5, 25 <sup>th</sup> percentile: 9.1, 75 <sup>th</sup> percentile 27.2); p=0.01 | 2: Yes<br><br>11: Yes<br>13: No<br><br>18: Yes<br>20: Yes<br><br>NA1: Yes<br>NA2: Yes<br>Total: 6 |

**Notes:** We used a modified Downs and Black checklist to assess the risk of bias (see online repository protocol). We created a risk of bias index (0-7, with higher numbers indicating higher risk of bias) and *a priori* planned to exclude any studies with a score of 4 or higher (none were excluded).  
*Italicized records* represent records or effect sizes that were excluded from synthesis and analysis because they 1) were combined with another record or 2) only reported adjusted effect sizes.  
<sup>\*</sup>These two studies used similar methods to examine identical relationships with the same data, so only the first published study was included for analysis  
ES=Effect Size

| Author (Year), ID           | Study Design    | Study Location                      | Unit of Analysis (N)                  | Statistical Approach | Data Source (Year): Area-Level Sociodemographic Variable                                                                     | Data Source (Year): Tobacco Retailers                                                              | Number and Type of Tobacco Retailers Included | Area-Level Outcome Variable Operationalization | Unadjusted Effect Sizes                      | Risk of Bias                                                                                      |
|-----------------------------|-----------------|-------------------------------------|---------------------------------------|----------------------|------------------------------------------------------------------------------------------------------------------------------|----------------------------------------------------------------------------------------------------|-----------------------------------------------|------------------------------------------------|----------------------------------------------|---------------------------------------------------------------------------------------------------|
|                             |                 |                                     |                                       |                      |                                                                                                                              | Police Department <ul style="list-style-type: none"><li>Baltimore City Police Department</li></ul> |                                               |                                                |                                              |                                                                                                   |
| Giovenco 2019 <sup>18</sup> | Cross-sectional | New York City (New York)<br><br>USA | Neighborhood Tabulation Areas (N=188) | Linear regression    | US Census Bureau’s 5-year American Community Survey (2015)<br><br>Proportion of non-Hispanic black residents (scaled to 10s) | New York City Open Data Portal (July 2017)                                                         | N=8,291<br><br>All licensed tobacco retailers | Count of tobacco retailers per 1000 residents  | ES1: B: -0.03, 95% CI: -0.07, 0.01, p=0.190  | 2: Yes<br><br>11: Yes<br>13: No<br><br>18: Yes<br>20: Yes<br><br>NA1: Yes<br>NA2: Yes<br>Total: 6 |
|                             |                 |                                     |                                       |                      | Proportion of non-Hispanic white residents (scaled to 10s)                                                                   |                                                                                                    |                                               |                                                | ES2: B: 0.01, 95% CI: -0.02, 0.05, p=0.435   |                                                                                                   |
|                             |                 |                                     |                                       |                      | Proportion of Hispanic residents (scaled to 10s)                                                                             |                                                                                                    |                                               |                                                | ES3: B: 0.02, 95% CI: -0.03, 0.07, p=0.468   |                                                                                                   |
|                             |                 |                                     |                                       |                      | Proportion of non-Hispanic Asian residents (scaled to 10s)                                                                   |                                                                                                    |                                               |                                                | ES4: B: -0.008, 95% CI: -0.02, 0.07, p=0.827 |                                                                                                   |
|                             |                 |                                     |                                       |                      | Proportion of residents with no health insurance (scaled to 10s)                                                             |                                                                                                    |                                               |                                                | ES5: B: 0.02, 95% CI: -0.18, 0.22, p=0.808   |                                                                                                   |
|                             |                 |                                     |                                       |                      | Median household income (scaled to \$10,000; calculated as                                                                   |                                                                                                    |                                               |                                                | ES6: B: 0.06, 95% CI: 0.02, 0.10, p=0.007    |                                                                                                   |

**Notes:** We used a modified Downs and Black checklist to assess the risk of bias (see online repository protocol). We created a risk of bias index (0-7, with higher numbers indicating higher risk of bias) and *a priori* planned to exclude any studies with a score of 4 or higher (none were excluded).

*Italicized records* represent records or effect sizes that were excluded from synthesis and analysis because they 1) were combined with another record or 2) only reported adjusted effect sizes.

<sup>\*</sup>These two studies used similar methods to examine identical relationships with the same data, so only the first published study was included for analysis

ES=Effect Size

| Author (Year), ID                | Study Design    | Study Location                    | Unit of Analysis (N)   | Statistical Approach         | Data Source (Year): Area-Level Sociodemographic Variable                                                                                                                  | Data Source (Year): Tobacco Retailers                                                                                           | Number and Type of Tobacco Retailers Included                            | Area-Level Outcome Variable Operationalization                                                                                                                          | Unadjusted Effect Sizes                                                                                                                                                                                                   | Risk of Bias                                                                                      |
|----------------------------------|-----------------|-----------------------------------|------------------------|------------------------------|---------------------------------------------------------------------------------------------------------------------------------------------------------------------------|---------------------------------------------------------------------------------------------------------------------------------|--------------------------------------------------------------------------|-------------------------------------------------------------------------------------------------------------------------------------------------------------------------|---------------------------------------------------------------------------------------------------------------------------------------------------------------------------------------------------------------------------|---------------------------------------------------------------------------------------------------|
|                                  |                 |                                   |                        |                              | the average median household income of all census tracts in the Neighborhood Tabulation Area)                                                                             |                                                                                                                                 |                                                                          |                                                                                                                                                                         |                                                                                                                                                                                                                           |                                                                                                   |
|                                  |                 |                                   |                        |                              | Proportion of the population 25 years and older with less than a high school education                                                                                    |                                                                                                                                 |                                                                          |                                                                                                                                                                         | ES7: B: -0.02, 95% CI: -0.13, 0.08, p=0.634                                                                                                                                                                               |                                                                                                   |
| <b>Hylan d 2003<sup>19</sup></b> | Cross-sectional | Erie County (New York)<br><br>USA | Census tracts (N=227)  | Analysis of Variance (ANOVA) | Census (1990)<br><br>Median household income (quartiles)                                                                                                                  | Erie County Department of Health (1996)                                                                                         | N=1,019<br><br>All licensed tobacco retailers                            | Count of tobacco retailers per 10 km of roadway                                                                                                                         | ES1:<br>Q1: <19,850 (μ: 4.0)<br>Q2: <27,736 (μ: 3.1)<br>Q3: <35,386 (μ: 1.7)<br>Q4: >=35,386 (μ: 1.2)<br><br>p<0.05                                                                                                       | 2: Yes<br><br>11: Yes<br>13: No<br><br>18: Yes<br>20: Yes<br><br>NA1: Yes<br>NA2: Yes<br>Total: 6 |
|                                  |                 |                                   |                        |                              | Percentage of African American residents (quartiles)                                                                                                                      |                                                                                                                                 |                                                                          | Count of tobacco retailers per 10 km of roadway                                                                                                                         | ES2:<br>Q1: >6.1 (μ: 4.2)<br>Q2: >0.8 (μ: 2.3)<br>Q3: >0.3 (μ: 1.6)<br>Q4: <=0.3 (μ: 2.0)<br><br>p<0.05                                                                                                                   |                                                                                                   |
| <b>Jenkins 2022<sup>20</sup></b> | Cross-sectional | Ohio<br><br>USA                   | Census tract (N=2,951) | 2x2 chi^2 analyses           | American Community Survey 5-year Estimates (2016)<br><br>• 'High' vs. 'Low' racial and ethnic minority (Non-Hispanic Black residents and Hispanic residents, 15% cut-off) | Active licensed cigarette retailers: all 88 of Ohio's county auditor offices (fall of 2017)<br><br>Hookah cafes and vape shops: | N=11,065<br><br>Tobacco retailers<br><br>N=327<br><br>Vape/hookah stores | Prevalence of 8 tobacco retailer type: convenience store, discount store, grocery store or mass merchandiser, pharmacy, bar or restaurant, tobacco shop, alcohol store, | No unadjusted effect sizes reported: Results are presented by stratifications of high vs. low minority, poverty, and urbanicity.<br><br>"Convenience stores and discount stores selling tobacco were more common (whereas | 2: Yes<br><br>11: Yes<br>13: No<br><br>18: Yes<br>20: Yes<br><br>NA1: Yes                         |

**Notes:** We used a modified Downs and Black checklist to assess the risk of bias (see online repository protocol). We created a risk of bias index (0-7, with higher numbers indicating higher risk of bias) and *a priori* planned to exclude any studies with a score of 4 or higher (none were excluded).

*Italicized records* represent records or effect sizes that were excluded from synthesis and analysis because they 1) were combined with another record or 2) only reported adjusted effect sizes.

\*These two studies used similar methods to examine identical relationships with the same data, so only the first published study was included for analysis

ES=Effect Size



| Author (Year), ID       | Study Design    | Study Location                         | Unit of Analysis (N)           | Statistical Approach                                  | Data Source (Year): Area-Level Sociodemographic Variable                                                                                                                                                                                                                                                                | Data Source (Year): Tobacco Retailers              | Number and Type of Tobacco Retailers Included                                                                                                                                                                                                                                                                                                                                                                                                                                                              | Area-Level Outcome Variable Operationalization          | Unadjusted Effect Sizes                                                                                                                                                                                                                                                                                                                                                           | Risk of Bias                                                                                     |
|-------------------------|-----------------|----------------------------------------|--------------------------------|-------------------------------------------------------|-------------------------------------------------------------------------------------------------------------------------------------------------------------------------------------------------------------------------------------------------------------------------------------------------------------------------|----------------------------------------------------|------------------------------------------------------------------------------------------------------------------------------------------------------------------------------------------------------------------------------------------------------------------------------------------------------------------------------------------------------------------------------------------------------------------------------------------------------------------------------------------------------------|---------------------------------------------------------|-----------------------------------------------------------------------------------------------------------------------------------------------------------------------------------------------------------------------------------------------------------------------------------------------------------------------------------------------------------------------------------|--------------------------------------------------------------------------------------------------|
|                         |                 |                                        |                                |                                                       | • ‘High’ vs. ‘Low’ prevalence of poverty (15.4% cut-off)                                                                                                                                                                                                                                                                | Internet directories (e.g., Yelp, Yellowpages.com) | Note: The authors state that a small percentage of retailers were excluded from analyses but do not specify number                                                                                                                                                                                                                                                                                                                                                                                         | vape or hookah shop, other                              | grocery stores and pharmacies were less common) in historically disadvantaged US Census tracts, based on poverty, racial and ethnic composition, or urban and rural status.” (p.1)                                                                                                                                                                                                | NA2: Yes<br>Total: 6                                                                             |
| King 2020 <sup>21</sup> | Cross-sectional | Virginia and North Carolina<br><br>USA | Census tract (N=not specified) | Linear regression models with spatial autocorrelation | 5-year American Community Survey (2017)<br><br>• Percentage of people who were Black<br>• Percentage of people who were Hispanic<br>• Percentage of people who had a bachelor degree or higher (college-educational)<br>• Percentage of people college-enrolled<br>• Percentage of people living below the poverty line | NAICS Association (January 2018)                   | Traditional tobacco retailers identified by NAICS code: supermarkets/grocery stores; convenience stores; tobacco stores; gasoline with convenience; warehouse clubs/supercenters; newsstands; beer, wine, liquor stores; pharmacies; discount department stores; other gasoline stations (N=15,084)<br><br>Vape shops: “...defined as places that primarily sold e-cigarettes or other vaping devices.” (p. 2396) (N=875)<br><br>Also assessed waterpipe cafes: “...defined as places that sold and served | Count of tobacco retailers (each type) per 1,000 people | No unadjusted effect sizes reported.<br><br>“Waterpipe cafe, vape shop, and traditional retailer density were higher in communities with more people who were Hispanic, college-educated, and college-enrolled (each p < .05). Waterpipe cafe and traditional retailer density were higher in communities with more people living below the poverty level (each p < .05).” p.2395 | 2: Yes<br><br>11: Yes<br>13: No<br><br>18: Yes<br>20: Yes<br><br>NA1: No<br>NA2: Yes<br>Total: 5 |

**Notes:** We used a modified Downs and Black checklist to assess the risk of bias (see online repository protocol). We created a risk of bias index (0-7, with higher numbers indicating higher risk of bias) and *a priori* planned to exclude any studies with a score of 4 or higher (none were excluded).

*Italicized records* represent records or effect sizes that were excluded from synthesis and analysis because they 1) were combined with another record or 2) only reported adjusted effect sizes.

<sup>†</sup>These two studies used similar methods to examine identical relationships with the same data, so only the first published study was included for analysis

ES=Effect Size

| Author (Year), ID               | Study Design    | Study Location                   | Unit of Analysis (N)          | Statistical Approach                        | Data Source (Year): Area-Level Sociodemographic Variable                                                                                                    | Data Source (Year): Tobacco Retailers                                                                                                                                                                                                                                                                                                                                                                                           | Number and Type of Tobacco Retailers Included                                                                       | Area-Level Outcome Variable Operationalization | Unadjusted Effect Sizes                                                                                                                                                                              | Risk of Bias                                                                                      |
|---------------------------------|-----------------|----------------------------------|-------------------------------|---------------------------------------------|-------------------------------------------------------------------------------------------------------------------------------------------------------------|---------------------------------------------------------------------------------------------------------------------------------------------------------------------------------------------------------------------------------------------------------------------------------------------------------------------------------------------------------------------------------------------------------------------------------|---------------------------------------------------------------------------------------------------------------------|------------------------------------------------|------------------------------------------------------------------------------------------------------------------------------------------------------------------------------------------------------|---------------------------------------------------------------------------------------------------|
|                                 |                 |                                  |                               |                                             |                                                                                                                                                             |                                                                                                                                                                                                                                                                                                                                                                                                                                 | <i>waterpipe tobacco onsite... ” (p. 2396) (N=362)</i>                                                              |                                                |                                                                                                                                                                                                      |                                                                                                   |
| <b>Kirst 2019</b> <sup>22</sup> | Cross-sectional | Toronto (Ontario)<br><br>Canada  | Census tract (N=87)           | Correlation coefficient                     | Canadian Census (2006)<br><br>Median after-tax household income                                                                                             | Ontario Ministry of Health and Long-Term Care Tobacco Information System database (2011)<br><br>Additional ground-truthing in four randomly selected Forward Sortation Areas was conducted: “A data collector visited all vendors (including convenience stores, grocery stores, restaurants/bars, and gas stations) within the area and verified whether the vendor sold cigarettes by asking the clerk at the counter.”) p. 2 | N not specified<br><br>Cigarette retailers (convenience stores, grocery stores, restaurants/bars, and gas stations) | Count of tobacco retailers per km <sup>2</sup> | ES1: correlation coefficient: -0.27, p<0.0001                                                                                                                                                        | 2: Yes<br><br>11: Yes<br>13: No<br><br>18: Yes<br>20: Yes<br><br>NA1: Yes<br>NA2: Yes<br>Total: 6 |
| <b>Kite 2014</b> <sup>23</sup>  | Cross-Sectional | New South Wales<br><br>Australia | Local government area (N=138) | Linear regression (logged outcome variable) | Socio-Economic Indexes for Areas (SEIFA): composite socioeconomic disadvantage measure including level of education, employment status and household income | State government list (request made for data in 2011 but unclear actual year of licensing data)                                                                                                                                                                                                                                                                                                                                 | N=11,640<br><br>All licensed tobacco retailers                                                                      | Count of tobacco retailers per 100,000 people  | No unadjusted effect sizes reported.<br><br>“Our findings indicate that there is an association between tobacco outlet density and social disadvantage and remoteness, after controlling for smoking | 2: Yes<br>11: Yes<br>13: Yes<br><br>18: Yes<br>20: Yes<br><br>NA1: Yes<br>NA2: Yes                |

**Notes:** We used a modified Downs and Black checklist to assess the risk of bias (see online repository protocol). We created a risk of bias index (0-7, with higher numbers indicating higher risk of bias) and *a priori* planned to exclude any studies with a score of 4 or higher (none were excluded).

*Italicized records* represent records or effect sizes that were excluded from synthesis and analysis because they 1) were combined with another record or 2) only reported adjusted effect sizes.

\*These two studies used similar methods to examine identical relationships with the same data, so only the first published study was included for analysis

ES=Effect Size

| Author (Year), ID       | Study Design    | Study Location    | Unit of Analysis (N)     | Statistical Approach       | Data Source (Year): Area-Level Sociodemographic Variable              | Data Source (Year): Tobacco Retailers                                                    | Number and Type of Tobacco Retailers Included | Area-Level Outcome Variable Operationalization | Unadjusted Effect Sizes                                                                                                                 | Risk of Bias                                                                                          |
|-------------------------|-----------------|-------------------|--------------------------|----------------------------|-----------------------------------------------------------------------|------------------------------------------------------------------------------------------|-----------------------------------------------|------------------------------------------------|-----------------------------------------------------------------------------------------------------------------------------------------|-------------------------------------------------------------------------------------------------------|
|                         |                 |                   |                          |                            |                                                                       |                                                                                          |                                               |                                                | <i>prevalence, in New South Wales, Australia.” p.181</i>                                                                                | <i>Total: 6</i>                                                                                       |
| Kong 2020 <sup>24</sup> | Cross-sectional | USA (contiguous ) | Census tracts (N=71,074) | Spatial Durbin Error Model | 2010-2014 American Community Survey<br><br>Percent non-Hispanic Black | ReferenceUSA (2014) based on North American Industry Classification System (NAICS) codes | N not specified<br><br>All tobacco retailers  | Count of tobacco retailers per 1,000 people    | ES1: Total, B: 0.07 (SE: 0.00), p<0.0001<br>ES2: Direct, B: 0.06 (SE: 0.00), p<0.0001<br>ES3: Indirect, B: 0.01 (SE: 0.01), p<0.05      | 2: Yes<br><br>11: Yes<br>13: Yes<br><br>18: Yes<br>20: Yes<br><br>NA1: No<br>NA2: Yes<br><br>Total: 6 |
|                         |                 |                   |                          |                            | Percent non-Hispanic Black                                            |                                                                                          |                                               | Count of tobacco retailers per square mile     | ES4: Total, B: 0.13 (SE: 0.01), p<0.0001<br>ES5: Direct, B: 0.05 (SE: 0.01), p<0.0001<br>ES6: Indirect, B: 0.09 (SE: 0.01), p<0.0001    |                                                                                                       |
|                         |                 |                   |                          |                            | Percent Hispanic or Latino ethnicity                                  |                                                                                          |                                               | Count of tobacco retailers per 1,000 people    | ES7: Total, B: -0.02 (SE: 0.00), p<0.0001<br>ES8: Direct, B: 0.09 (SE: 0.01), p<0.0001<br>ES9: Indirect, B: -0.11 (SE: 0.01), p<0.0001  |                                                                                                       |
|                         |                 |                   |                          |                            | Percent Hispanic or Latino ethnicity                                  |                                                                                          |                                               | Count of tobacco retailers per square mile     | ES10: Total, B: 0.33 (SE: 0.01), p<0.0001<br>ES11: Direct, B: 0.24 (SE: 0.01), p<0.0001<br>ES12: Indirect, B: 0.09 (SE: 0.01), p<0.0001 |                                                                                                       |
|                         |                 |                   |                          |                            | Percent living below 150% of the federal poverty level                |                                                                                          |                                               | Count of tobacco retailers per 1,000 people    | ES13: Total, B: 0.18 (SE: 0.00), p<0.0001<br>ES14: Direct, B: 0.18 (SE: 0.00), p<0.0001                                                 |                                                                                                       |

**Notes:** We used a modified Downs and Black checklist to assess the risk of bias (see online repository protocol). We created a risk of bias index (0-7, with higher numbers indicating higher risk of bias) and *a priori* planned to exclude any studies with a score of 4 or higher (none were excluded).

*Italicized records* represent records or effect sizes that were excluded from synthesis and analysis because they 1) were combined with another record or 2) only reported adjusted effect sizes.

\*These two studies used similar methods to examine identical relationships with the same data, so only the first published study was included for analysis

ES=Effect Size

| Author (Year), ID                                                    | Study Design    | Study Location | Unit of Analysis (N)     | Statistical Approach       | Data Source (Year): Area-Level Sociodemographic Variable                                                                                                                                                                                                                                                                                                                                                      | Data Source (Year): Tobacco Retailers                                                    | Number and Type of Tobacco Retailers Included | Area-Level Outcome Variable Operationalization | Unadjusted Effect Sizes                                                                                                                                                                                                                                                                                                                                                                                                                                                                                                                                                                  | Risk of Bias                                                                                          |
|----------------------------------------------------------------------|-----------------|----------------|--------------------------|----------------------------|---------------------------------------------------------------------------------------------------------------------------------------------------------------------------------------------------------------------------------------------------------------------------------------------------------------------------------------------------------------------------------------------------------------|------------------------------------------------------------------------------------------|-----------------------------------------------|------------------------------------------------|------------------------------------------------------------------------------------------------------------------------------------------------------------------------------------------------------------------------------------------------------------------------------------------------------------------------------------------------------------------------------------------------------------------------------------------------------------------------------------------------------------------------------------------------------------------------------------------|-------------------------------------------------------------------------------------------------------|
|                                                                      |                 |                |                          |                            |                                                                                                                                                                                                                                                                                                                                                                                                               |                                                                                          |                                               |                                                | ES15: Indirect, B: 0.01 (SE: 0.01), not statistically significant                                                                                                                                                                                                                                                                                                                                                                                                                                                                                                                        |                                                                                                       |
|                                                                      |                 |                |                          |                            | Percent living below 150% of the federal poverty level                                                                                                                                                                                                                                                                                                                                                        |                                                                                          |                                               | Count of tobacco retailers per square mile     | ES16: Total, B: 0.40 (SE: 0.01), p<0.0001<br>ES17: Direct, B: 0.25 (SE: 0.01), p<0.0001<br>ES18: Indirect, B: 0.15 (SE: 0.01), p<0.0001                                                                                                                                                                                                                                                                                                                                                                                                                                                  |                                                                                                       |
| <b>Kong 2021</b> <sup>25</sup>                                       | Cross-sectional | USA            | Census tracts (N=71,409) | Spatial Durbin Error Model | 2014-2018 American Community Survey <ul style="list-style-type: none"><li>Percent of non-Hispanic white residents</li><li>Percent of non-Hispanic Black or African American residents</li><li>Percent of Hispanic or Latino ethnicity residents</li><li>Percent of residents living below 150% of the federal poverty level</li><li>Median household income</li><li>Gini Index of income inequality</li></ul> | ReferenceUSA (2018) based on North American Industry Classification System (NAICS) codes | N not specified<br><br>All tobacco retailers  | Count of tobacco retailers per square mile     | No unadjusted effect sizes reported.<br><br>“A 10-percentage point increase in the Black population was associated with 0.07 (p < 0.05) more retailers per square mile within a focal tract and 0.35 (p < 0.001) more retailers per square mile in its neighbors on average. A greater percent of Hispanic/Latino residents was associated with more retailers per square mile, both within a focal tract (b = 0.95, p < 0.001) and in its neighbors 0.39 (p < 0.001). Inverse associations were observed for percent white. We also observed inequities by socioeconomic status.” (p.1) | 2: Yes<br><br>11: Yes<br>13: Yes<br><br>18: Yes<br>20: Yes<br><br>NA1: No<br>NA2: Yes<br><br>Total: 6 |
| <b>Kong 2022</b> <sup>26</sup><br><br><b>Kong 2020</b> <sup>24</sup> | Cross-sectional | USA            | Census tracts (N=71,495) | Linear regression          | 2014-2018 American Community Survey<br><br>Percentage of non-Hispanic Black or African American                                                                                                                                                                                                                                                                                                               | ReferenceUSA (2018) based on North American Industry Classification System (NAICS) codes | N=325,884<br><br>All tobacco retailers        | Count of tobacco retailers                     | ES1: B: 0.03 (SE: 0.01), p<0.001<br><br>All results are also reported stratified by urbanicity.<br><br>An earlier dissertation (Kong 2020, #8690) used similar                                                                                                                                                                                                                                                                                                                                                                                                                           | 2: Yes<br><br>11: Yes<br>13: Yes<br><br>18: Yes<br>20: Yes                                            |

**Notes:** We used a modified Downs and Black checklist to assess the risk of bias (see online repository protocol). We created a risk of bias index (0-7, with higher numbers indicating higher risk of bias) and *a priori* planned to exclude any studies with a score of 4 or higher (none were excluded).  
*Italicized records* represent records or effect sizes that were excluded from synthesis and analysis because they 1) were combined with another record or 2) only reported adjusted effect sizes.  
\*These two studies used similar methods to examine identical relationships with the same data, so only the first published study was included for analysis  
ES=Effect Size

| Author (Year), ID | Study Design | Study Location | Unit of Analysis (N) | Statistical Approach | Data Source (Year): Area-Level Sociodemographic Variable                        | Data Source (Year): Tobacco Retailers | Number and Type of Tobacco Retailers Included | Area-Level Outcome Variable Operationalization                  | Unadjusted Effect Sizes                                                                                                                                                                                                                                                                            | Risk of Bias                        |
|-------------------|--------------|----------------|----------------------|----------------------|---------------------------------------------------------------------------------|---------------------------------------|-----------------------------------------------|-----------------------------------------------------------------|----------------------------------------------------------------------------------------------------------------------------------------------------------------------------------------------------------------------------------------------------------------------------------------------------|-------------------------------------|
|                   |              |                |                      |                      | population (scaled to 10s)                                                      |                                       |                                               |                                                                 | <i>methods to examine similar relationships with data from 2014 in the contiguous USA, finding overall a similar pattern of results in terms direction and significance except for a null result (B=0.00, not statistically significant) for % Hispanic or Latino (retailers per 1000 people).</i> | NA1: No<br>NA2: Yes<br><br>Total: 6 |
|                   |              |                |                      | Linear regression    | Percentage of non-Hispanic Black or African American population (scaled to 10s) |                                       |                                               | Count of tobacco retailers per 1,000 people                     | ES2: B: 0.04 (SE: 0.00), p<0.001                                                                                                                                                                                                                                                                   |                                     |
|                   |              |                |                      | Linear regression    | Percentage of non-Hispanic Black or African American population (scaled to 10s) |                                       |                                               | Count of tobacco retailers per square mile                      | ES3: B: 0.51 (SE: 0.02), p<0.001                                                                                                                                                                                                                                                                   |                                     |
|                   |              |                |                      | Linear regression    | Percentage of non-Hispanic Black or African American population (scaled to 10s) |                                       |                                               | Count of tobacco retailers per 10 kilometers of roadway         | ES4: B: 0.10 (SE: 0.00), p<0.001                                                                                                                                                                                                                                                                   |                                     |
|                   |              |                |                      | Logistic regression  | Percentage of non-Hispanic Black or African American population (scaled to 10s) |                                       |                                               | Presence (vs. absence) of at least one tobacco-selling pharmacy | ES17: OR: 0.97, 95% CI: 0.96-0.98                                                                                                                                                                                                                                                                  |                                     |
|                   |              |                |                      | Logistic regression  | Percentage of non-Hispanic Black or African American population (scaled to 10s) |                                       |                                               | Presence (vs. absence) of at least one tobacco shop             | ES18: OR: 0.93, 95% CI: 0.92-0.94                                                                                                                                                                                                                                                                  |                                     |

**Notes:** We used a modified Downs and Black checklist to assess the risk of bias (see online repository protocol). We created a risk of bias index (0-7, with higher numbers indicating higher risk of bias) and *a priori* planned to exclude any studies with a score of 4 or higher (none were excluded).  
*Italicized records* represent records or effect sizes that were excluded from synthesis and analysis because they 1) were combined with another record or 2) only reported adjusted effect sizes.  
\*These two studies used similar methods to examine identical relationships with the same data, so only the first published study was included for analysis  
ES=Effect Size

| Author (Year), ID | Study Design | Study Location | Unit of Analysis (N) | Statistical Approach | Data Source (Year): Area-Level Sociodemographic Variable                                | Data Source (Year): Tobacco Retailers | Number and Type of Tobacco Retailers Included | Area-Level Outcome Variable Operationalization                  | Unadjusted Effect Sizes           | Risk of Bias |
|-------------------|--------------|----------------|----------------------|----------------------|-----------------------------------------------------------------------------------------|---------------------------------------|-----------------------------------------------|-----------------------------------------------------------------|-----------------------------------|--------------|
|                   |              |                |                      | Linear regression    | Percentage of Hispanic or Latino population (scaled to 10s)                             |                                       |                                               | Count of tobacco retailers                                      | ES5: B: 0.06 (SE: 0.01), p<0.001  |              |
|                   |              |                |                      | Linear regression    | Percentage of Hispanic or Latino population (scaled to 10s)                             |                                       |                                               | Count of tobacco retailers per 1,000 people                     | ES6: B: -0.01 (SE: 0.00), p<0.001 |              |
|                   |              |                |                      | Linear regression    | Percentage of Hispanic or Latino population (scaled to 10s)                             |                                       |                                               | Count of tobacco retailers per square mile                      | ES7: B: 1.28 (SE: 0.02), p<0.001  |              |
|                   |              |                |                      | Linear regression    | Percentage of Hispanic or Latino population (scaled to 10s)                             |                                       |                                               | Count of tobacco retailers per 10 kilometers of roadway         | ES8: B: 0.25 (SE: 0.00), p<0.001  |              |
|                   |              |                |                      | Logistic regression  | Percentage of Hispanic or Latino population (scaled to 10s)                             |                                       |                                               | Presence (vs. absence) of at least one tobacco-selling pharmacy | ES19: OR: 0.98, 95% CI: 0.97-0.99 |              |
|                   |              |                |                      | Logistic regression  | Percentage of Hispanic or Latino population (scaled to 10s)                             |                                       |                                               | Presence (vs. absence) of at least one tobacco shop             | ES20: OR: 1.03, 95% CI: 1.02-1.04 |              |
|                   |              |                |                      | Linear regression    | Percentage of population living below 150% of the federal poverty level (scaled to 10s) |                                       |                                               | Count of tobacco retailers                                      | ES9: B: 0.40 (SE: 0.01), p<0.001  |              |
|                   |              |                |                      | Linear regression    | Percentage of population living below 150% of the federal poverty level (scaled to 10s) |                                       |                                               | Count of tobacco retailers per 1,000 people                     | ES10: B: 0.16 (SE: 0.00), p<0.001 |              |
|                   |              |                |                      | Linear regression    | Percentage of population living below 150% of the federal poverty level (scaled to 10s) |                                       |                                               | Count of tobacco retailers per square mile                      | ES11: B: 1.41 (SE: 0.03), p<0.001 |              |

**Notes:** We used a modified Downs and Black checklist to assess the risk of bias (see online repository protocol). We created a risk of bias index (0-7, with higher numbers indicating higher risk of bias) and *a priori* planned to exclude any studies with a score of 4 or higher (none were excluded).  
*Italicized records* represent records or effect sizes that were excluded from synthesis and analysis because they 1) were combined with another record or 2) only reported adjusted effect sizes.  
\*These two studies used similar methods to examine identical relationships with the same data, so only the first published study was included for analysis  
ES=Effect Size

| Author (Year), ID       | Study Design           | Study Location         | Unit of Analysis (N)      | Statistical Approach | Data Source (Year): Area-Level Sociodemographic Variable                                | Data Source (Year): Tobacco Retailers                         | Number and Type of Tobacco Retailers Included | Area-Level Outcome Variable Operationalization                  | Unadjusted Effect Sizes                                                            | Risk of Bias     |
|-------------------------|------------------------|------------------------|---------------------------|----------------------|-----------------------------------------------------------------------------------------|---------------------------------------------------------------|-----------------------------------------------|-----------------------------------------------------------------|------------------------------------------------------------------------------------|------------------|
|                         |                        |                        |                           | Linear regression    | Percentage of population living below 150% of the federal poverty level (scaled to 10s) |                                                               |                                               | Count of tobacco retailers per 10 kilometers of roadway         | ES12: B: 0.27 (SE: 0.00), p<0.001                                                  |                  |
|                         |                        |                        |                           | Logistic regression  | Percentage of population living below 150% of the federal poverty level (scaled to 10s) |                                                               |                                               | Presence (vs. absence) of at least one tobacco-selling pharmacy | ES21: OR: 0.96, 95% CI: 0.95-0.97                                                  |                  |
|                         |                        |                        |                           | Logistic regression  | Percentage of population living below 150% of the federal poverty level (scaled to 10s) |                                                               |                                               | Presence (vs. absence) of at least one tobacco shop             | ES22: OR: 1.06, 95% CI: 1.05-1.07                                                  |                  |
|                         |                        |                        |                           | Linear regression    | Percentage of vacant housing units (scaled to 10s)                                      |                                                               |                                               | Count of tobacco retailers                                      | ES13: B: 0.23 (SE: 0.01), p<0.001                                                  |                  |
|                         |                        |                        |                           | Linear regression    | Percentage of vacant housing units (scaled to 10s)                                      |                                                               |                                               | Count of tobacco retailers per 1,000 people                     | ES14: B: 0.24 (SE: 0.00), p<0.001                                                  |                  |
|                         |                        |                        |                           | Linear regression    | Percentage of vacant housing units (scaled to 10s)                                      |                                                               |                                               | Count of tobacco retailers per square mile                      | ES15: B: -0.51 (SE: 0.04), p<0.001                                                 |                  |
|                         |                        |                        |                           | Linear regression    | Percentage of vacant housing units (scaled to 10s)                                      |                                                               |                                               | Count of tobacco retailers per 10 kilometers of roadway         | ES16: B: -0.14 (SE: 0.01), p<0.001                                                 |                  |
|                         |                        |                        |                           | Logistic regression  | Percentage of vacant housing units (scaled to 10s)                                      |                                                               |                                               | Presence (vs. absence) of at least one tobacco-selling pharmacy | ES23: OR: 0.82, 95% CI: 0.81-0.84                                                  |                  |
|                         |                        |                        |                           | Logistic regression  | Percentage of vacant housing units (scaled to 10s)                                      |                                                               |                                               | Presence (vs. absence) of at least one tobacco shop             | ES24: OR: 0.88, 95% CI: 0.86-0.90                                                  |                  |
| Laws 2002 <sup>27</sup> | Repeated cross-section | Boston (Massachusetts) | Business district (n=10); | Spearman correlation | Did not specify data source (1989):                                                     | Store audits/visits; did not specify how stores were located: | South Lawrence (N=80)                         | Percentage of stores selling tobacco products                   | ES1: Year 1 and Year 2 correlation between per capita income in a district and the | 2: Yes<br>11: No |

**Notes:** We used a modified Downs and Black checklist to assess the risk of bias (see online repository protocol). We created a risk of bias index (0-7, with higher numbers indicating higher risk of bias) and *a priori* planned to exclude any studies with a score of 4 or higher (none were excluded).

*Italicized records* represent records or effect sizes that were excluded from synthesis and analysis because they 1) were combined with another record or 2) only reported adjusted effect sizes.

<sup>†</sup>These two studies used similar methods to examine identical relationships with the same data, so only the first published study was included for analysis

ES=Effect Size

| Author (Year), ID      | Study Design    | Study Location                           | Unit of Analysis (N)                                                                                                                                                                                                                                                                                                                                                                                       | Statistical Approach     | Data Source (Year): Area-Level Sociodemographic Variable | Data Source (Year): Tobacco Retailers                                                                                                                                                                                                            | Number and Type of Tobacco Retailers Included                | Area-Level Outcome Variable Operationalization | Unadjusted Effect Sizes                                                                                                                                                                                                                                                                                                                                         | Risk of Bias                                                            |
|------------------------|-----------------|------------------------------------------|------------------------------------------------------------------------------------------------------------------------------------------------------------------------------------------------------------------------------------------------------------------------------------------------------------------------------------------------------------------------------------------------------------|--------------------------|----------------------------------------------------------|--------------------------------------------------------------------------------------------------------------------------------------------------------------------------------------------------------------------------------------------------|--------------------------------------------------------------|------------------------------------------------|-----------------------------------------------------------------------------------------------------------------------------------------------------------------------------------------------------------------------------------------------------------------------------------------------------------------------------------------------------------------|-------------------------------------------------------------------------|
|                        |                 | USA                                      | “first selected the largest Latino enclave in Boston ... and ... the largest predominantly Latino community in Massachusetts. We identified census tracts of similar economic status but differing ethnic composition, then selected at random a predominantly African American district... For contrast, we purposefully selected Newbury Street in Boston’s Back Bay, an affluent neighborhood.” p. ii71 |                          | Per capita income                                        | “All private businesses open to the public were observed and included in the database.” p. ii72<br><br>Stores were visited twice: 1998 (Year 1); 1999 (Year 2)<br><br>Note: some stores in two business districts were not revisited both years. | Newbury Street (N=406)                                       |                                                | percentage of establishments selling tobacco (p: -0.794, p=0.006)<br><br>ES2: Year 1 correlation between per capita income in a district and the percentage of establishments selling tobacco (p: -0.9, p=0.037)<br><br>ES3: Year 2 correlation between per capita income in a district and the percentage of establishments selling tobacco (p: -0.7, p=0.036) | 13: No<br><br>18: Yes<br>20: Yes<br><br>NA1: No<br>NA2: Yes<br>Total: 4 |
| Lee 2016 <sup>28</sup> | Cross-sectional | 97 counties (for nationally representati | Census tract (N=17,667)                                                                                                                                                                                                                                                                                                                                                                                    | Spatial error regression | US Census (2010)                                         | Reference USA (2012)                                                                                                                                                                                                                             | N=not reported<br><br>Supermarkets and other grocery (except | Count of tobacco retailers per 1000 people     | ES1: Female Couples: Estimate: 0.01, SE: <0.01, p<0.001                                                                                                                                                                                                                                                                                                         | 2: Yes<br><br>11: Yes<br>13: Yes                                        |

**Notes:** We used a modified Downs and Black checklist to assess the risk of bias (see online repository protocol). We created a risk of bias index (0-7, with higher numbers indicating higher risk of bias) and *a priori* planned to exclude any studies with a score of 4 or higher (none were excluded).

*Italicized records* represent records or effect sizes that were excluded from synthesis and analysis because they 1) were combined with another record or 2) only reported adjusted effect sizes.

\*These two studies used similar methods to examine identical relationships with the same data, so only the first published study was included for analysis

ES=Effect Size



| Author (Year), ID      | Study Design    | Study Location                                                                                   | Unit of Analysis (N)    | Statistical Approach     | Data Source (Year): Area-Level Sociodemographic Variable                                                                         | Data Source (Year): Tobacco Retailers                                                                | Number and Type of Tobacco Retailers Included                                                                                                                                                                                                                                                                                                             | Area-Level Outcome Variable Operationalization | Unadjusted Effect Sizes                                                                                                                                                                                                                                                                                                                               | Risk of Bias                                                                                      |
|------------------------|-----------------|--------------------------------------------------------------------------------------------------|-------------------------|--------------------------|----------------------------------------------------------------------------------------------------------------------------------|------------------------------------------------------------------------------------------------------|-----------------------------------------------------------------------------------------------------------------------------------------------------------------------------------------------------------------------------------------------------------------------------------------------------------------------------------------------------------|------------------------------------------------|-------------------------------------------------------------------------------------------------------------------------------------------------------------------------------------------------------------------------------------------------------------------------------------------------------------------------------------------------------|---------------------------------------------------------------------------------------------------|
|                        |                 | ve sample of US tobacco retailers)<br><br>USA                                                    |                         |                          | Same-sex coupled households per 1000 coupled households                                                                          | North American Industry Classification System (NAICS) Association (2012)                             | convenience) stores, convenience stores, tobacco stores, gasoline stations with convenience stores, warehouse clubs and supercenters, news dealers and newsstands, beer, wine, and liquor stores (except state-controlled liquor stores), pharmacies and drug stores (top 50 chains), discount department stores (Walmart only), other gasoline stations. |                                                | ES3: Sensitivity tests excluding edge tracts from counties (n=15,085): Estimate: -0.05, p<0.01<br><br>ES2: Male Couples: Estimate: 0.01, SE: <0.01, p<0.001<br><br>ES4: Sensitivity tests excluding edge tracts from counties (n=15,085): Estimate: 0.01, p=not specified, “estimates were similar” p. 151<br><br>Also reports adjusted effect sizes. | 18: Yes<br>20: Yes<br><br>NA1: No<br>NA2: Yes<br>Total: 6                                         |
| Lee 2017 <sup>29</sup> | Cross-sectional | 97 counties (for nationally representative sample of contiguous US tobacco retailers)<br><br>USA | Census tract (N=17,667) | Spatial error regression | Census (2010)<br><br>Proportion identifying as black/African-American (alone or in combination with other races) (scaled to 10s) | Reference USA (2012)<br><br>North American Industry Classification System (NAICS) Association (2012) | N=89,804<br><br>Supermarkets and grocery stores, convenience stores, tobacco shops, gasoline stations with convenience stores, warehouse clubs and supercenters, news dealers and newsstands, alcohol stores (except state-owned liquor stores), pharmacies (top 50 chains only), discount department stores                                              | Count of tobacco retailers per 1000 people     | ES3: Coefficient: 0.05, 95% CI: 0.04, 0.07                                                                                                                                                                                                                                                                                                            | 2: Yes<br><br>11: Yes<br>13: Yes<br><br>18: Yes<br>20: Yes<br><br>NA1: No<br>NA2: Yes<br>Total: 6 |

**Notes:** We used a modified Downs and Black checklist to assess the risk of bias (see online repository protocol). We created a risk of bias index (0-7, with higher numbers indicating higher risk of bias) and *a priori* planned to exclude any studies with a score of 4 or higher (none were excluded).

*Italicized records* represent records or effect sizes that were excluded from synthesis and analysis because they 1) were combined with another record or 2) only reported adjusted effect sizes.

<sup>†</sup>These two studies used similar methods to examine identical relationships with the same data, so only the first published study was included for analysis

ES=Effect Size

| Author (Year), ID                | Study Design           | Study Location                                                                             | Unit of Analysis (N)                                     | Statistical Approach                                                                          | Data Source (Year): Area-Level Sociodemographic Variable                                                                                                                 | Data Source (Year): Tobacco Retailers                                                                                                                                 | Number and Type of Tobacco Retailers Included           | Area-Level Outcome Variable Operationalization                 | Unadjusted Effect Sizes                                                                                                                                                                                               | Risk of Bias                                                                             |
|----------------------------------|------------------------|--------------------------------------------------------------------------------------------|----------------------------------------------------------|-----------------------------------------------------------------------------------------------|--------------------------------------------------------------------------------------------------------------------------------------------------------------------------|-----------------------------------------------------------------------------------------------------------------------------------------------------------------------|---------------------------------------------------------|----------------------------------------------------------------|-----------------------------------------------------------------------------------------------------------------------------------------------------------------------------------------------------------------------|------------------------------------------------------------------------------------------|
|                                  |                        |                                                                                            |                                                          |                                                                                               |                                                                                                                                                                          |                                                                                                                                                                       | (Walmart only), other gasoline stations.                |                                                                |                                                                                                                                                                                                                       |                                                                                          |
|                                  |                        |                                                                                            |                                                          |                                                                                               | Proportion identifying as Asian/Pacific Islander (alone or in combination with other races) (scaled to 10s)                                                              |                                                                                                                                                                       |                                                         | Count of tobacco retailers per 1000 people                     | ES2: Coefficient: -0.04, 95% CI: -0.06, -0.01                                                                                                                                                                         |                                                                                          |
|                                  |                        |                                                                                            |                                                          |                                                                                               | Proportion identifying as Hispanic or Latino ethnicity (scaled to 10s)                                                                                                   |                                                                                                                                                                       |                                                         | Count of tobacco retailers per 1000 people                     | ES4: Coefficient: 0.01, 95% CI: -0.01, 0.02                                                                                                                                                                           |                                                                                          |
|                                  |                        |                                                                                            |                                                          |                                                                                               | Proportion identifying as white race alone (scaled to 10s)                                                                                                               |                                                                                                                                                                       |                                                         | Count of tobacco retailers per 1000 people                     | ES5: Coefficient: -0.04, 95% CI: -0.05, -0.03                                                                                                                                                                         |                                                                                          |
|                                  |                        |                                                                                            |                                                          |                                                                                               | American Community Survey 5-year estimates (2008-2012)<br><br>Median household income in 2012 dollars, standardized within each county and scaled to 10s                 |                                                                                                                                                                       |                                                         | Count of tobacco retailers per 1000 people                     | ES1: Coefficient: -0.24, 95% CI: -0.27, -0.22                                                                                                                                                                         |                                                                                          |
|                                  |                        |                                                                                            |                                                          |                                                                                               | Percentage of housing units that are renter occupied (scaled to 10s)                                                                                                     |                                                                                                                                                                       |                                                         | Count of tobacco retailers per 1000 people                     | ES7: Coefficient: 0.15, 95% CI: 0.14, 0.16                                                                                                                                                                            |                                                                                          |
|                                  |                        |                                                                                            |                                                          |                                                                                               | Percentage of housing units that are vacant (scaled to 10s)                                                                                                              |                                                                                                                                                                       |                                                         | Count of tobacco retailers per 1000 people                     | ES6: Coefficient: 0.35, 95% CI: -0.32, 0.38                                                                                                                                                                           |                                                                                          |
| <i>Loomis 2013</i> <sup>30</sup> | <i>Cross-sectional</i> | <i>New York (stratified analyses for New York State; Greater New York City/Long Island</i> | <i>Census tract (total = 4,795; differs by location)</i> | <i>Spatial lag regression<br/><br/>Ordinary Least Square (OLS) regression (Monroe County)</i> | <i>Data source and year not specified.</i> <ul style="list-style-type: none"><li><i>Percentage of African Americans</i></li><li><i>Percentage of Hispanics</i></li></ul> | <i>Data source not specified but states “New York State requires retailers who wish to sell tobacco to obtain a licence from the New York State Department of Tax</i> | <i>N=19,420<br/><br/>All licensed tobacco retailers</i> | <i>Count of tobacco retailers per 10 kilometers of roadway</i> | <i>No unadjusted effect sizes reported.<br/><br/>“In New York State, residential census tracts with higher proportions of African Americans and Hispanics generally had a significantly higher density of tobacco</i> | <i>2: Yes<br/><br/>11: Yes<br/>13: No<br/><br/>18: Yes<br/>20: Yes<br/><br/>NA1: Yes</i> |

**Notes:** We used a modified Downs and Black checklist to assess the risk of bias (see online repository protocol). We created a risk of bias index (0-7, with higher numbers indicating higher risk of bias) and *a priori* planned to exclude any studies with a score of 4 or higher (none were excluded).

*Italicized records* represent records or effect sizes that were excluded from synthesis and analysis because they 1) were combined with another record or 2) only reported adjusted effect sizes.

<sup>\*</sup>These two studies used similar methods to examine identical relationships with the same data, so only the first published study was included for analysis

ES=Effect Size

| Author (Year), ID | Study Design    | Study Location                                                                                                                                                                                                                                                                                                      | Unit of Analysis (N) | Statistical Approach                    | Data Source (Year): Area-Level Sociodemographic Variable                | Data Source (Year): Tobacco Retailers           | Number and Type of Tobacco Retailers Included | Area-Level Outcome Variable Operationalization        | Unadjusted Effect Sizes                                                                                                                                                                                                                                                        | Risk of Bias          |
|-------------------|-----------------|---------------------------------------------------------------------------------------------------------------------------------------------------------------------------------------------------------------------------------------------------------------------------------------------------------------------|----------------------|-----------------------------------------|-------------------------------------------------------------------------|-------------------------------------------------|-----------------------------------------------|-------------------------------------------------------|--------------------------------------------------------------------------------------------------------------------------------------------------------------------------------------------------------------------------------------------------------------------------------|-----------------------|
|                   |                 | [Bronx, Kings, Nassau, New York, Queens, Richmond, Suffolk, Westchester Counties]; New York minus Greater New York City/Long Island [rest of State]; Capital region [Albany, Rensselaer, Saratoga, Schenectady Counties]; Erie County [Buffalo]; Monroe County [Rochester] ; Onondaga County [Syracuse])<br><br>USA |                      |                                         | <ul style="list-style-type: none"><li>Median household income</li></ul> | and Finance” p. 334 (2009)                      |                                               |                                                       | retailers. Census tracts with a higher percentage of residents aged <18 years and higher median household income generally had a significantly lower density of tobacco retailers. However, these associations were not statistically significant in all areas studied.” P.333 | N42: Yes<br>Total: 6  |
| Maras hi-         | Cross-sectional | New South Wales                                                                                                                                                                                                                                                                                                     | Census collection    | Generalized ordered logistic regression | Australian Census (2006): residential population data for               | New South Wales (NSW) Ministry of Health online | N=12,422                                      | Adaptive bandwidth kernel density estimation (maximum | No unadjusted effect sizes reported.                                                                                                                                                                                                                                           | 2: Yes<br><br>11: Yes |

**Notes:** We used a modified Downs and Black checklist to assess the risk of bias (see online repository protocol). We created a risk of bias index (0-7, with higher numbers indicating higher risk of bias) and *a priori* planned to exclude any studies with a score of 4 or higher (none were excluded).

*Italicized records* represent records or effect sizes that were excluded from synthesis and analysis because they 1) were combined with another record or 2) only reported adjusted effect sizes.

\*These two studies used similar methods to examine identical relationships with the same data, so only the first published study was included for analysis

ES=Effect Size

| Author (Year), ID               | Study Design    | Study Location | Unit of Analysis (N)        | Statistical Approach | Data Source (Year): Area-Level Sociodemographic Variable                                                                                                                                                                                                                                                                                                                                                                                                                                                                                                                                                                                                                                                    | Data Source (Year): Tobacco Retailers                                                                                                                                                                                                                                             | Number and Type of Tobacco Retailers Included | Area-Level Outcome Variable Operationalization                                                                                                                                                                                                | Unadjusted Effect Sizes                                                                                                            | Risk of Bias                                                          |
|---------------------------------|-----------------|----------------|-----------------------------|----------------------|-------------------------------------------------------------------------------------------------------------------------------------------------------------------------------------------------------------------------------------------------------------------------------------------------------------------------------------------------------------------------------------------------------------------------------------------------------------------------------------------------------------------------------------------------------------------------------------------------------------------------------------------------------------------------------------------------------------|-----------------------------------------------------------------------------------------------------------------------------------------------------------------------------------------------------------------------------------------------------------------------------------|-----------------------------------------------|-----------------------------------------------------------------------------------------------------------------------------------------------------------------------------------------------------------------------------------------------|------------------------------------------------------------------------------------------------------------------------------------|-----------------------------------------------------------------------|
| <i>Pour 2015</i> <sup>31</sup>  |                 | Australia      | districts (N=11,811)        |                      | estimating population density to be used for retailer density calculation. "Each property was given a weight based on the estimated number of people living in each household in each census collection district." (p. 2)<br><br>NSW Index of Relative Socioeconomic Disadvantage (IRSD) calculated for the NSW 2006 Census population: "This index uses 20 disadvantage indicator variables including income, education, employment and the proportion of Aboriginal people to assign a relative socioeconomic status to geographic areas" (p. 2) (categorized into population-weighted quintiles "where the first quintile indicates least disadvantage and the fifth quintile most disadvantage") (p. 2) | registration system ("...all tobacco retailers have been required to notify NSW Ministry of Health..." ) (2009-2011) (p. 2)<br><br>All registered tobacco retailers (e.g., tobacconists, supermarkets, newsagents, petrol stations, convenience stores, liquor licensed premises) | All registered tobacco retailers              | bandwidth: 1000 people or 25 kilometers in "sparsely populated areas" (p. 2)); count of tobacco retailers per 1,000 population (average "categorized into four approximately equal-sized ordered categories": zero, low, medium, high) (p. 2) | "More disadvantaged Census Collection Districts (CDs) were significantly more likely to have higher tobacco outlet densities." P.1 | 13: Yes<br>18: Yes<br>20: Yes<br><br>NA1: Yes<br>NA2: Yes<br>Total: 7 |
| <b>Marsh 2013</b> <sup>32</sup> | Cross-sectional | New Zealand    | Meshblock (N=not specified) | Linear regression    | NZDep2006 index (2006): "combines nine variables from the 2006                                                                                                                                                                                                                                                                                                                                                                                                                                                                                                                                                                                                                                              | Compiled through contacts with Smokefree                                                                                                                                                                                                                                          | N=5,008                                       | Count of tobacco retailers                                                                                                                                                                                                                    | ES1: Coefficient: 72.4, SE: 10.01, 95% CI: 49.32-95.48, p<0.05                                                                     | 2: Yes<br><br>11: Yes                                                 |

**Notes:** We used a modified Downs and Black checklist to assess the risk of bias (see online repository protocol). We created a risk of bias index (0-7, with higher numbers indicating higher risk of bias) and *a priori* planned to exclude any studies with a score of 4 or higher (none were excluded).

*Italicized records* represent records or effect sizes that were excluded from synthesis and analysis because they 1) were combined with another record or 2) only reported adjusted effect sizes.

<sup>†</sup>These two studies used similar methods to examine identical relationships with the same data, so only the first published study was included for analysis

ES=Effect Size

| Author (Year), ID        | Study Design    | Study Location | Unit of Analysis (N)        | Statistical Approach | Data Source (Year): Area-Level Sociodemographic Variable                                                                                                                                                                                                                                                                | Data Source (Year): Tobacco Retailers                                                                                                                                                                                                                                                                                                             | Number and Type of Tobacco Retailers Included                                          | Area-Level Outcome Variable Operationalization | Unadjusted Effect Sizes                                 | Risk of Bias                                                                                       |
|--------------------------|-----------------|----------------|-----------------------------|----------------------|-------------------------------------------------------------------------------------------------------------------------------------------------------------------------------------------------------------------------------------------------------------------------------------------------------------------------|---------------------------------------------------------------------------------------------------------------------------------------------------------------------------------------------------------------------------------------------------------------------------------------------------------------------------------------------------|----------------------------------------------------------------------------------------|------------------------------------------------|---------------------------------------------------------|----------------------------------------------------------------------------------------------------|
|                          |                 |                |                             |                      | census that reflect eight dimensions of deprivation, including income, education, qualifications, employment, housing, access to a car and telephone” (p. 166) where 1=least deprived score and 10=most deprived score                                                                                                  | Enforcement Officers at each District Health Board as no available register: “The local lists compiled by SEOs represented the most accurate source of data on tobacco retailers...these included visits to retailers, local knowledge, and the use of directories such as Yellow Pages, internet directors, and local newspapers.” p. 166 (2017) | All known tobacco retailers                                                            |                                                |                                                         | 13: Yes<br><br>18: Yes<br>20: Yes<br><br>NA1: Yes<br>NA2: Yes<br>Total: 7                          |
| Marsh 2020 <sup>33</sup> | Cross-sectional | New Zealand    | Meshblock (N=not specified) | Linear regression    | Census (2013): count of residents aged 15 years and above (used for density calculation)<br><br>NZDep2013 index (2013): “...combines nine variables from the 2013 census that reflect eight dimensions of deprivation...” where 1=areas with the least deprived score and 10=areas with the most deprived score (p. 35) | “We developed a national database of tobacco retailers in 2012. This was updated in 2017 using the same methods. The tobacco retailer database includes convenience stores, petrol stations, supermarkets, and liquor stores; pharmacies do not currently sell                                                                                    | N=5,243<br><br>Convenience stores, petrol stations, liquor stores, supermarkets, other | Count of tobacco retailers                     | ES1: Coefficient: 87.81, SE: 9.22; 95% CI: 66.56-109.07 | 2: Yes<br><br>11: Yes<br>13: Yes<br><br>18: Yes<br>20: Yes<br><br>NA1: Yes<br>NA2: Yes<br>Total: 7 |

**Notes:** We used a modified Downs and Black checklist to assess the risk of bias (see online repository protocol). We created a risk of bias index (0-7, with higher numbers indicating higher risk of bias) and *a priori* planned to exclude any studies with a score of 4 or higher (none were excluded).

*Italicized records* represent records or effect sizes that were excluded from synthesis and analysis because they 1) were combined with another record or 2) only reported adjusted effect sizes.

\*These two studies used similar methods to examine identical relationships with the same data, so only the first published study was included for analysis

ES=Effect Size

| Author (Year), ID         | Study Design    | Study Location                | Unit of Analysis (N) | Statistical Approach         | Data Source (Year): Area-Level Sociodemographic Variable  | Data Source (Year): Tobacco Retailers                                                                                                                                                                                                                                                                                                                     | Number and Type of Tobacco Retailers Included | Area-Level Outcome Variable Operationalization | Unadjusted Effect Sizes                                                                                                            | Risk of Bias                                                              |
|---------------------------|-----------------|-------------------------------|----------------------|------------------------------|-----------------------------------------------------------|-----------------------------------------------------------------------------------------------------------------------------------------------------------------------------------------------------------------------------------------------------------------------------------------------------------------------------------------------------------|-----------------------------------------------|------------------------------------------------|------------------------------------------------------------------------------------------------------------------------------------|---------------------------------------------------------------------------|
|                           |                 |                               |                      |                              |                                                           | tobacco in New Zealand.” P.35<br><br>Additionally, petrol station audited using online lists; off-licence liquor stores obtained from New Zealand Liquor Licensing Authority and audited by phone to verify they sold tobacco. Duplicate listings and missing/incomplete addresses were removed/resolved through online searching and Google Street View. |                                               |                                                |                                                                                                                                    |                                                                           |
|                           |                 |                               |                      |                              |                                                           |                                                                                                                                                                                                                                                                                                                                                           |                                               | Count of liquor stores                         | ES2: Coefficient: 14.17, SE: 1.60; 95% CI: 10.48-17.86                                                                             |                                                                           |
|                           |                 |                               |                      |                              |                                                           |                                                                                                                                                                                                                                                                                                                                                           |                                               | Count of petrol stations                       | ES3: Coefficient: 15.17, SE: 2.75; 95% CI: 8.82-21.52                                                                              |                                                                           |
| Mayers 2012 <sup>34</sup> | Cross-sectional | Polk County (Iowa)<br><br>USA | Census tract (N=80)  | Analysis of Variance (ANOVA) | Census (2000)<br><br>Percent African American (quartiles) | State of Iowa licensing (2003)                                                                                                                                                                                                                                                                                                                            | N=482<br><br>All licensed tobacco retailers   | Count of tobacco retailers per 10 km roadway   | ES1: df=3; F=1.82, η <sup>2</sup> =0.08, p=0.16 (did not report means across quartiles)<br><br>Also reports adjusted effect sizes. | 2: Yes<br><br>11: Yes<br>13: No<br><br>18: Yes<br>20: Yes<br><br>NA1: Yes |

**Notes:** We used a modified Downs and Black checklist to assess the risk of bias (see online repository protocol). We created a risk of bias index (0-7, with higher numbers indicating higher risk of bias) and *a priori* planned to exclude any studies with a score of 4 or higher (none were excluded).

*Italicized records* represent records or effect sizes that were excluded from synthesis and analysis because they 1) were combined with another record or 2) only reported adjusted effect sizes.

<sup>\*</sup>These two studies used similar methods to examine identical relationships with the same data, so only the first published study was included for analysis

ES=Effect Size

| Author (Year), ID         | Study Design    | Study Location        | Unit of Analysis (N)           | Statistical Approach | Data Source (Year): Area-Level Sociodemographic Variable                                                                                                                                                                                                                                         | Data Source (Year): Tobacco Retailers                                                                                | Number and Type of Tobacco Retailers Included | Area-Level Outcome Variable Operationalization | Unadjusted Effect Sizes                                                                                                                                                                                                                                                                                                                                                                             | Risk of Bias                                                                                      |
|---------------------------|-----------------|-----------------------|--------------------------------|----------------------|--------------------------------------------------------------------------------------------------------------------------------------------------------------------------------------------------------------------------------------------------------------------------------------------------|----------------------------------------------------------------------------------------------------------------------|-----------------------------------------------|------------------------------------------------|-----------------------------------------------------------------------------------------------------------------------------------------------------------------------------------------------------------------------------------------------------------------------------------------------------------------------------------------------------------------------------------------------------|---------------------------------------------------------------------------------------------------|
|                           |                 |                       |                                |                      |                                                                                                                                                                                                                                                                                                  |                                                                                                                      |                                               |                                                |                                                                                                                                                                                                                                                                                                                                                                                                     | NA2: Yes<br>Total: 6                                                                              |
|                           |                 |                       |                                |                      | Percent Hispanic (quartiles)                                                                                                                                                                                                                                                                     |                                                                                                                      |                                               | Count of tobacco retailers per 10km roadway    | ES2: df=3; F=0.04, η2=0.00, p=0.99 (did not report means across quartiles)<br><br>Also reports adjusted effect sizes.                                                                                                                                                                                                                                                                               |                                                                                                   |
|                           |                 |                       |                                |                      | Median household income (quartiles)                                                                                                                                                                                                                                                              |                                                                                                                      |                                               | Count of tobacco retailers per 10km roadway    | ES3: df=3; F=1.30, η2=0.05, p=0.28 (did not report means across quartiles)<br><br>Also reports adjusted effect sizes and interactions between quartiles of sociodemographic variables.                                                                                                                                                                                                              |                                                                                                   |
|                           |                 |                       |                                |                      |                                                                                                                                                                                                                                                                                                  |                                                                                                                      |                                               | Count of tobacco outlets per 1000 population   | No unadjusted effect sizes reported.                                                                                                                                                                                                                                                                                                                                                                |                                                                                                   |
|                           |                 |                       |                                |                      |                                                                                                                                                                                                                                                                                                  |                                                                                                                      |                                               | Count of tobacco retailers per square mile     | No unadjusted effect sizes reported.                                                                                                                                                                                                                                                                                                                                                                |                                                                                                   |
| Melody 2018 <sup>35</sup> | Cross-sectional | Tasmania<br>Australia | Statistical Area Level 2 (SA2) | Poisson regression   | Australian Bureau of Statistics (ABS) Index of Relative Socioeconomic Advantage and Disadvantage (IRSAD) (2011): composite score where lower values indicate greater socioeconomic disadvantage (quartiles)<br><br>ABS Census of Population and Housing (2011): used total population counts for | Tobacco Seller’s License database maintained by the Tasmania Department of Health and Human Services (December 2016) | N=769<br><br>All licensed tobacco retailers   | Count of tobacco retailers per 1000 residents  | IRSAD quartiles (Q) where Very High (least deprived) = reference<br><br>Tasmania (94 SA2s)<br>ES1: High (Rate Ratio: 1.60, 95% CI: 0.89, 3.00, p=0.13)<br>ES2: Low (Rate Ratio: 2.24, 95% CI: 1.30, 4.09, p=0.011)<br>ES3: Very Low (most deprived) (Rate Ratio: 2.30, 95% CI: 1.32, 4.21, p=0.014)<br><br>Great Hobart region (33 SA2s)<br>ES4: High (Rate Ratio: 0.89, 95% CI: 0.30, 2.45, p=1.0) | 2: Yes<br><br>11: Yes<br>13: No<br><br>18: Yes<br>20: Yes<br><br>NA1: Yes<br>NA2: Yes<br>Total: 6 |

**Notes:** We used a modified Downs and Black checklist to assess the risk of bias (see online repository protocol). We created a risk of bias index (0-7, with higher numbers indicating higher risk of bias) and *a priori* planned to exclude any studies with a score of 4 or higher (none were excluded).

*Italicized records* represent records or effect sizes that were excluded from synthesis and analysis because they 1) were combined with another record or 2) only reported adjusted effect sizes.

\*These two studies used similar methods to examine identical relationships with the same data, so only the first published study was included for analysis

ES=Effect Size

| Author (Year), ID        | Study Design             | Study Location | Unit of Analysis (N)          | Statistical Approach  | Data Source (Year): Area-Level Sociodemographic Variable                                                                                                                                                                                                                                                                                                                                            | Data Source (Year): Tobacco Retailers                                                                                                                                                                                                                                                                                          | Number and Type of Tobacco Retailers Included | Area-Level Outcome Variable Operationalization | Unadjusted Effect Sizes                                                                                                                                                                                                                                                                                                                                                                                                                                                                                                                                                           | Risk of Bias                                                                                      |
|--------------------------|--------------------------|----------------|-------------------------------|-----------------------|-----------------------------------------------------------------------------------------------------------------------------------------------------------------------------------------------------------------------------------------------------------------------------------------------------------------------------------------------------------------------------------------------------|--------------------------------------------------------------------------------------------------------------------------------------------------------------------------------------------------------------------------------------------------------------------------------------------------------------------------------|-----------------------------------------------|------------------------------------------------|-----------------------------------------------------------------------------------------------------------------------------------------------------------------------------------------------------------------------------------------------------------------------------------------------------------------------------------------------------------------------------------------------------------------------------------------------------------------------------------------------------------------------------------------------------------------------------------|---------------------------------------------------------------------------------------------------|
|                          |                          |                |                               |                       | outcome variable calculation                                                                                                                                                                                                                                                                                                                                                                        |                                                                                                                                                                                                                                                                                                                                |                                               |                                                | ES5: Low (Rate Ratio: 1.19, 95% CI: 0.47, 3.00, p=1.0)<br>ES6: Very Low (most deprived) (Rate Ratio: 1.57, 95% CI: 0.69, 3.75, p=0.88)<br><br>Tasmania, excluding Great Hobart (61 SA2s)<br>ES7: High (Rate Ratio: 1.29, 95% CI: 0.66, 2.60, p=0.46)<br>ES8: Low (Rate Ratio: 2.31, 95% CI: 1.29, 4.44, p=0.017)<br>ES9: Very Low (most deprived) (Rate Ratio: 2.01, 95% CI: 1.10, 3.88, p=0.029)                                                                                                                                                                                 |                                                                                                   |
| Mills 2022 <sup>36</sup> | Repeated cross-sectional | USA            | Census tract (N not reported) | Log-linear regression | 2000 US Decennial Census; 2005-2009/2010-2014/2015-2019 American Community Surveys <ul style="list-style-type: none"><li>Percent of the population that is non-Hispanic Black or African American</li><li>Percent of the population that is Hispanic or Latino ethnicity</li><li>Median household income (adjusted for inflation)</li><li>Percent of housing rental units that are vacant</li></ul> | NETS Database (2000-2017) using North American Industry Classification System (NAICS) codes "...for which the majority (>=50%) were tobacco retailers and who sales accounted for at least 2% of all retail tobacco sales as tobacco retailers [...] along with stores whose name included the words "tobacco," "cigarette" or | N not specified.<br><br>All tobacco retailers | Count of tobacco retailers per 1,000 people    | No unadjusted effect sizes reported.<br><br>"There were significant, positive relationships between tobacco retailer density and the percentage of Black (standardized exp(b) = 1.05 [95% CI: 1.04% to 1.07%]) and Hispanic (standardized exp(b) = 1.06 [95% CI: 1.05% to 1.08%]) residents and the percentage of vacant housing units (standardized exp(b) =1.08 [95% CI: 1.07% to 1.10%]) in a census tract. Retailer density was negatively associated with income (standardized exp(b) = 0.84 [95% CI: 0.82% to 0.86%]). From 2000 to 2017, the relationship between retailer | 2: Yes<br><br>11: Yes<br>13: Yes<br><br>18: Yes<br>20: Yes<br><br>NA1: No<br>NA2: Yes<br>Total: 6 |

**Notes:** We used a modified Downs and Black checklist to assess the risk of bias (see online repository protocol). We created a risk of bias index (0-7, with higher numbers indicating higher risk of bias) and *a priori* planned to exclude any studies with a score of 4 or higher (none were excluded).

*Italicized records* represent records or effect sizes that were excluded from synthesis and analysis because they 1) were combined with another record or 2) only reported adjusted effect sizes.

<sup>†</sup>These two studies used similar methods to examine identical relationships with the same data, so only the first published study was included for analysis

ES=Effect Size



| Author (Year), ID        | Study Design    | Study Location                | Unit of Analysis (N)                                                                   | Statistical Approach   | Data Source (Year): Area-Level Sociodemographic Variable | Data Source (Year): Tobacco Retailers                                                                                                                                                                                                                                                                                                                            | Number and Type of Tobacco Retailers Included                                                   | Area-Level Outcome Variable Operationalization                                                                          | Unadjusted Effect Sizes                                                     | Risk of Bias                                                                                     |
|--------------------------|-----------------|-------------------------------|----------------------------------------------------------------------------------------|------------------------|----------------------------------------------------------|------------------------------------------------------------------------------------------------------------------------------------------------------------------------------------------------------------------------------------------------------------------------------------------------------------------------------------------------------------------|-------------------------------------------------------------------------------------------------|-------------------------------------------------------------------------------------------------------------------------|-----------------------------------------------------------------------------|--------------------------------------------------------------------------------------------------|
|                          |                 |                               |                                                                                        |                        |                                                          | <i>“vape”/“vapor”/“vaping.”” (p.1292)</i>                                                                                                                                                                                                                                                                                                                        |                                                                                                 |                                                                                                                         | <i>density and income and vacant housing units became weaker.” (p.1291)</i> |                                                                                                  |
| Novak 2006 <sup>37</sup> | Cross-sectional | Chicago (Illinois)<br><br>USA | Census tract (n=178)<br><br>Sample of census tracts for larger individual-level study. | Bivariate Correlations | Census (1990)<br><br>Percentage White                    | Ground-truthed (year not specified): “Trained raters drove at 5mph down every street within the selected census tracts. Each side of the block was videotaped...Additional codes were created to identify any retail locations that were licensed to sell tobacco, specifically liquor stores, gas stations, convenience stores, supermarkets, and bars.” p. 671 | N not specified.<br><br>Liquor stores, gas stations, convenience stores, supermarkets, and bars | Count of block faces with at least 1 retail outlet divided by the total number of observed block faces per census tract | ES1: r: -0.16, p=0.027                                                      | 2: Yes<br><br>11: Yes<br>13: No<br><br>18: Yes<br>20: Yes<br><br>NA1: No<br>NA2: Yes<br>Total: 5 |
|                          |                 |                               |                                                                                        |                        | Percentage Black                                         |                                                                                                                                                                                                                                                                                                                                                                  |                                                                                                 |                                                                                                                         | ES2: r: -0.17, p=0.020                                                      |                                                                                                  |
|                          |                 |                               |                                                                                        |                        | Percentage Hispanic                                      |                                                                                                                                                                                                                                                                                                                                                                  |                                                                                                 |                                                                                                                         | ES3: r: 0.37, p=0.001                                                       |                                                                                                  |
|                          |                 |                               |                                                                                        |                        | Percentage Poverty                                       |                                                                                                                                                                                                                                                                                                                                                                  |                                                                                                 |                                                                                                                         | ES4: r: 0.22, p=0.003                                                       |                                                                                                  |
|                          |                 |                               |                                                                                        |                        | Percentage aged >25 y with associates degree or higher   |                                                                                                                                                                                                                                                                                                                                                                  |                                                                                                 |                                                                                                                         | ES5: r: -0.22, p=0.002                                                      |                                                                                                  |
|                          |                 |                               |                                                                                        |                        | Percentage aged >16 y unemployed                         |                                                                                                                                                                                                                                                                                                                                                                  |                                                                                                 |                                                                                                                         | ES6: r: 0.02, p=0.793                                                       |                                                                                                  |
|                          |                 |                               |                                                                                        |                        | Percentage foreign born                                  |                                                                                                                                                                                                                                                                                                                                                                  |                                                                                                 |                                                                                                                         | ES7: r: 0.38, p=0.001                                                       |                                                                                                  |
|                          |                 |                               |                                                                                        |                        | Percentage families with income <\$17,500                |                                                                                                                                                                                                                                                                                                                                                                  |                                                                                                 |                                                                                                                         | ES8: r: 0.29, p=0.001                                                       |                                                                                                  |

**Notes:** We used a modified Downs and Black checklist to assess the risk of bias (see online repository protocol). We created a risk of bias index (0-7, with higher numbers indicating higher risk of bias) and *a priori* planned to exclude any studies with a score of 4 or higher (none were excluded).

*Italicized records* represent records or effect sizes that were excluded from synthesis and analysis because they 1) were combined with another record or 2) only reported adjusted effect sizes.

\*These two studies used similar methods to examine identical relationships with the same data, so only the first published study was included for analysis

ES=Effect Size

| Author (Year), ID                       | Study Design    | Study Location                                   | Unit of Analysis (N)                                               | Statistical Approach                                           | Data Source (Year): Area-Level Sociodemographic Variable                                                                                               | Data Source (Year): Tobacco Retailers                                                                                                                 | Number and Type of Tobacco Retailers Included | Area-Level Outcome Variable Operationalization | Unadjusted Effect Sizes                                                                                                                                                                                               | Risk of Bias                                                                                  |
|-----------------------------------------|-----------------|--------------------------------------------------|--------------------------------------------------------------------|----------------------------------------------------------------|--------------------------------------------------------------------------------------------------------------------------------------------------------|-------------------------------------------------------------------------------------------------------------------------------------------------------|-----------------------------------------------|------------------------------------------------|-----------------------------------------------------------------------------------------------------------------------------------------------------------------------------------------------------------------------|-----------------------------------------------------------------------------------------------|
|                                         |                 |                                                  |                                                                    |                                                                | Percentage families with income >=\$17,500 and </= \$60,000                                                                                            |                                                                                                                                                       |                                               |                                                | ES9: r: 0.09, p=0.192                                                                                                                                                                                                 |                                                                                               |
|                                         |                 |                                                  |                                                                    |                                                                | Percentage families with income >\$60,000                                                                                                              |                                                                                                                                                       |                                               |                                                | ES10: r: -0.29, p=0.001                                                                                                                                                                                               |                                                                                               |
|                                         |                 |                                                  |                                                                    |                                                                | Percentage persons in owner-occupied housing                                                                                                           |                                                                                                                                                       |                                               |                                                | ES11: r: -0.35, p=0.001                                                                                                                                                                                               |                                                                                               |
|                                         |                 |                                                  |                                                                    |                                                                | Percentage households on public assistance                                                                                                             |                                                                                                                                                       |                                               |                                                | ES12: r: 0.07, p=0.315                                                                                                                                                                                                |                                                                                               |
| Ognev a-Himmelberger 2010 <sup>38</sup> | Cross-sectional | Worcester (Massachusetts)<br><br>USA             | Census block group (N=167)                                         | Kruskal-Wallis test comparing average tobacco retailer density | MassGIS (year not specified):<br><br>Tertiles of percentage minority population (defined as “non-Caucasian population”) p. 476                         | Worcester Health Department and License Commission (year not specified)                                                                               | N=289<br><br>All licensed tobacco retailers   | Count of tobacco retailers per 1,000 people    | E1: $\chi^2 = 11.13$ , p=0.004<br><br>Q1 (0-12%): 1.15<br>Q2 (12-30%): 2.08<br>Q3 (30-89%): 2.62<br><br>Also reports adjusted effect sizes.                                                                           | 2: Yes<br>11: Yes<br>13: No<br><br>18: Yes<br>20: Yes<br><br>NA1: Yes<br>NA2: Yes<br>Total: 6 |
|                                         |                 |                                                  |                                                                    | Kruskal-Wallis test comparing average tobacco retailer density | Tertiles of household income level “based on state definitions” of low (<\$25,000/year); medium (\$25,000-75,000/year); high (>\$75,000/year) (p. 476) |                                                                                                                                                       |                                               | Count of tobacco retailers per 1,000 people    | E2: $\chi^2 = 8.929$ , p=0.012<br><br>Q1 (Below \$25,000): 3.03<br>Q2 (\$25,000-75,000): 1.79<br>Q3 (>=\$75,000): 0<br><br>Also reports adjusted effect sizes.                                                        |                                                                                               |
| Paul 2010 <sup>39</sup>                 | Cross-sectional | Hunter Region (New South Wales)<br><br>Australia | Census collection districts (N=1,161)<br><br>Postcode areas (N=73) | Pearson correlation coefficient                                | Socio-economic Index for Areas (SEIFA) in quartiles                                                                                                    | Hunter & New England Area Health Service (HNEAHS) (year not specified): 1) database used for monitoring tobacco sales to minors; 2) licensed premises | N=1,270<br><br>All licensed tobacco retailers | Count of tobacco retailers                     | ES1: r: -0.140 (no p-value specified but authors state, “no significant relationship was found” p. 802)<br><br>ES2: r: 0.192 (no p-value specified but authors state, “no significant relationship was found” p. 802) | 2: Yes<br><br>11: Yes<br>13: No<br><br>18: Yes<br>20: Yes<br><br>NA1: Yes                     |

**Notes:** We used a modified Downs and Black checklist to assess the risk of bias (see online repository protocol). We created a risk of bias index (0-7, with higher numbers indicating higher risk of bias) and *a priori* planned to exclude any studies with a score of 4 or higher (none were excluded).

*Italicized records* represent records or effect sizes that were excluded from synthesis and analysis because they 1) were combined with another record or 2) only reported adjusted effect sizes.

\*These two studies used similar methods to examine identical relationships with the same data, so only the first published study was included for analysis

ES=Effect Size

| Author (Year), ID                  | Study Design    | Study Location        | Unit of Analysis (N)   | Statistical Approach                                                                                                                                                                                                                                                                           | Data Source (Year): Area-Level Sociodemographic Variable | Data Source (Year): Tobacco Retailers                                                                                                                                                                                                   | Number and Type of Tobacco Retailers Included  | Area-Level Outcome Variable Operationalization      | Unadjusted Effect Sizes                                                                                                            | Risk of Bias                                                                                      |
|------------------------------------|-----------------|-----------------------|------------------------|------------------------------------------------------------------------------------------------------------------------------------------------------------------------------------------------------------------------------------------------------------------------------------------------|----------------------------------------------------------|-----------------------------------------------------------------------------------------------------------------------------------------------------------------------------------------------------------------------------------------|------------------------------------------------|-----------------------------------------------------|------------------------------------------------------------------------------------------------------------------------------------|---------------------------------------------------------------------------------------------------|
|                                    |                 |                       |                        |                                                                                                                                                                                                                                                                                                |                                                          | “Such data sources represent the most accurate approximation of product availability” (p. 800) though authors acknowledge databases are updated every 2-3 years and there may be an underestimate of actual number of tobacco retailers |                                                |                                                     |                                                                                                                                    | NA2: Yes<br>Total: 6                                                                              |
| Peterso<br>n<br>2011 <sup>40</sup> | Cross-sectional | New Jersey<br><br>USA | Census tract (N=1,938) | Analysis of Variance (ANOVA) comparing average tobacco retailer density<br><br>Also reports ANOVA results of quartiles of demographic variables (i.e., median household income, percent African-American, and Percent Hispanic) and tobacco retailer density within three ‘disparity clusters’ | Census (2000)<br><br>Median household income             | New Jersey Department of the Treasury (2004)                                                                                                                                                                                            | N=13,984<br><br>All licensed tobacco retailers | Count of tobacco retail outlets per 10km of roadway | ES1: F(3,1933)=245.92, p<0.05<br><br>Q1 (<\$40,469): 13.1<br>Q2 (<=\$53,219): 4.8<br>Q3 (<=\$70,888): 2.3<br>Q4 (<=\$201,000): 1.5 | 2: Yes<br><br>11: Yes<br>13: No<br><br>18: Yes<br>20: Yes<br><br>NA1: Yes<br>NA2: Yes<br>Total: 6 |

**Notes:** We used a modified Downs and Black checklist to assess the risk of bias (see online repository protocol). We created a risk of bias index (0-7, with higher numbers indicating higher risk of bias) and *a priori* planned to exclude any studies with a score of 4 or higher (none were excluded).

*Italicized records* represent records or effect sizes that were excluded from synthesis and analysis because they 1) were combined with another record or 2) only reported adjusted effect sizes.

<sup>†</sup>These two studies used similar methods to examine identical relationships with the same data, so only the first published study was included for analysis

ES=Effect Size

| Author (Year), ID                      | Study Design    | Study Location | Unit of Analysis (N)     | Statistical Approach                                                    | Data Source (Year): Area-Level Sociodemographic Variable                                                                                                                                                                                                                                                                                         | Data Source (Year): Tobacco Retailers                                                                                                                                                                                                           | Number and Type of Tobacco Retailers Included                                                                  | Area-Level Outcome Variable Operationalization                                                                                               | Unadjusted Effect Sizes                                                                                                                                                                                               | Risk of Bias                                                                                      |
|----------------------------------------|-----------------|----------------|--------------------------|-------------------------------------------------------------------------|--------------------------------------------------------------------------------------------------------------------------------------------------------------------------------------------------------------------------------------------------------------------------------------------------------------------------------------------------|-------------------------------------------------------------------------------------------------------------------------------------------------------------------------------------------------------------------------------------------------|----------------------------------------------------------------------------------------------------------------|----------------------------------------------------------------------------------------------------------------------------------------------|-----------------------------------------------------------------------------------------------------------------------------------------------------------------------------------------------------------------------|---------------------------------------------------------------------------------------------------|
|                                        |                 |                |                          | Analysis of Variance (ANOVA) comparing average tobacco retailer density | Percent of African-American residents (quartiles)                                                                                                                                                                                                                                                                                                |                                                                                                                                                                                                                                                 |                                                                                                                | Count of tobacco retail outlets per 10km of roadway                                                                                          | ES2: F(3,1922)=26.52, p<0.05<br>Q1 (<01): 3.6<br>Q2 (<=04): 4.1<br>Q3 (<=15): 5.6<br>Q4 (<=98): 8.2                                                                                                                   |                                                                                                   |
|                                        |                 |                |                          | Analysis of Variance (ANOVA) comparing average tobacco retailer density | Percent of Hispanic residents (quartiles)                                                                                                                                                                                                                                                                                                        |                                                                                                                                                                                                                                                 |                                                                                                                | Count of tobacco retail outlets per 10km of roadway                                                                                          | ES3: F(3,1931)=280.85, p<0.05<br>Q1 (<03): 1.4<br>Q2 (<=06): 2.1<br>Q3 (<=15): 4.5<br>Q4 (<=93): 13.5                                                                                                                 |                                                                                                   |
| <i>Purushothaman 2022<sup>41</sup></i> | Longitudinal    | California USA | County (N not specified) | Mixed-effects linear regression model                                   | 2015-2019 American Community Survey <ul style="list-style-type: none"><li>• White population</li><li>• African American population</li><li>• Asian population</li><li>• American Indian/Alaska Native population</li><li>• Hispanic population</li><li>• Native Hawaiian/Pacific Islander population</li><li>• Median household income</li></ul> | California Department of Tax and Fee Administration (January 2015-December 2019)<br><br>Yelp: “In June 202, store categories listed on Yelp were data mined, based on store names and addresses obtained from CDTFA retail license data...” p.3 | N = 26,371<br><br>“Licenses that were cross-referenced and matched for store categorization using Yelp...” p.3 | Count of active tobacco retailer licenses, and broken down by “specialized” vs. “non-specialized” (p. 1) stores and tobacco/vape store types | No unadjusted effect sizes reported.<br><br>“Regional volume of retailers was positively associated with higher proportion of women, lower median household income, and higher proportion of Hispanic residents.” P.1 | 2: Yes<br><br>11: Yes<br>13: No<br><br>18: Yes<br>20: Yes<br><br>NA1: Yes<br>NA2: Yes<br>Total: 6 |
| Raskind 2022 <sup>42</sup>             | Cross-sectional | California USA | Census tract (N=6,716)   | Logistic regression                                                     | 2013-2017 American Community Survey<br><br>Percent non-Hispanic African American (standardized)                                                                                                                                                                                                                                                  | California Department of Tax and Fee Administration (CDTFA) (2018)                                                                                                                                                                              | N=7,678<br><br>All licensed tobacco retailers                                                                  | Presence (vs. absence) of at least one dollar store                                                                                          | ES1: OR: 1.16, 95% CI: 1.08-1.25                                                                                                                                                                                      | 2: Yes<br><br>11: No<br>13: No<br><br>18: Yes<br>20: Yes                                          |

**Notes:** We used a modified Downs and Black checklist to assess the risk of bias (see online repository protocol). We created a risk of bias index (0-7, with higher numbers indicating higher risk of bias) and *a priori* planned to exclude any studies with a score of 4 or higher (none were excluded).

*Italicized records* represent records or effect sizes that were excluded from synthesis and analysis because they 1) were combined with another record or 2) only reported adjusted effect sizes.

\*These two studies used similar methods to examine identical relationships with the same data, so only the first published study was included for analysis

ES=Effect Size

| Author (Year), ID       | Study Design    | Study Location | Unit of Analysis (N)   | Statistical Approach    | Data Source (Year): Area-Level Sociodemographic Variable                             | Data Source (Year): Tobacco Retailers    | Number and Type of Tobacco Retailers Included  | Area-Level Outcome Variable Operationalization                                       | Unadjusted Effect Sizes                                                                                                                                                                           | Risk of Bias                                                                                      |
|-------------------------|-----------------|----------------|------------------------|-------------------------|--------------------------------------------------------------------------------------|------------------------------------------|------------------------------------------------|--------------------------------------------------------------------------------------|---------------------------------------------------------------------------------------------------------------------------------------------------------------------------------------------------|---------------------------------------------------------------------------------------------------|
|                         |                 |                |                        |                         |                                                                                      |                                          |                                                |                                                                                      |                                                                                                                                                                                                   | NA1: Yes<br>NA2: Yes<br>Total: 5                                                                  |
|                         |                 |                |                        |                         | Percent Hispanic (any race) (standardized)                                           |                                          |                                                | Presence (vs. absence) of at least one dollar store                                  | ES2: OR: 1.57, 95% CI: 1.4-1.76                                                                                                                                                                   |                                                                                                   |
|                         |                 |                |                        |                         | Percent non-Hispanic Asian/Pacific Islander                                          |                                          |                                                | Presence (vs. absence) of at least one dollar store                                  | ES3: OR: 0.42, 95% CI: 0.34-0.52                                                                                                                                                                  |                                                                                                   |
|                         |                 |                |                        |                         | Percent non-Hispanic multiple races/American Indian and Alaska Native (standardized) |                                          |                                                | Presence (vs. absence) of at least one dollar store                                  | ES4: OR: 0.97, 95% CI: 0.84-1.12                                                                                                                                                                  |                                                                                                   |
|                         |                 |                |                        |                         | Median household income (standardized)                                               |                                          |                                                | Presence (vs. absence) of at least one dollar store                                  | ES5: OR: 0.23, 95% CI: 0.2-0.28                                                                                                                                                                   |                                                                                                   |
| Reid 2013 <sup>43</sup> | Cross-sectional | New Jersey USA | Census tract (N=1,935) | Hierarchical regression | United States Census (2000)<br><br>Percentage of Hispanic residents                  | New Jersey Department of Treasury (2004) | N=13,805<br><br>All licensed tobacco retailers | Count of tobacco retailers per 10 kilometers of roadway (logarithmic transformation) | ES1: b: 0.601, B: 0.616, SE: 0.018, p<0.001<br><br>ES2: R <sup>2</sup> : 0.38                                                                                                                     | 2: Yes<br><br>11: Yes<br>13: No<br><br>18: Yes<br>20: Yes<br><br>NA1: Yes<br>NA2: Yes<br>Total: 6 |
|                         |                 |                |                        |                         | Median household income of Hispanic residents (stratified variable)                  |                                          |                                                | Count of tobacco retailers per 10 kilometers of roadway (logarithmic transformation) | Stratified analyses of percentage of Hispanic residents by low vs. high median income tracts:<br>ES3: Low median income tracts: r=0.57, p<0.01<br>ES4: High median income tracts: r=0.34, p<0.001 |                                                                                                   |

**Notes:** We used a modified Downs and Black checklist to assess the risk of bias (see online repository protocol). We created a risk of bias index (0-7, with higher numbers indicating higher risk of bias) and *a priori* planned to exclude any studies with a score of 4 or higher (none were excluded).  
*Italicized records* represent records or effect sizes that were excluded from synthesis and analysis because they 1) were combined with another record or 2) only reported adjusted effect sizes.  
\*These two studies used similar methods to examine identical relationships with the same data, so only the first published study was included for analysis  
ES=Effect Size

| Author (Year), ID                   | Study Design    | Study Location    | Unit of Analysis (N)    | Statistical Approach             | Data Source (Year): Area-Level Sociodemographic Variable                                                                                                                                                                                                                                                                                                                               | Data Source (Year): Tobacco Retailers                                                              | Number and Type of Tobacco Retailers Included                                                                                                                                                                                                                                            | Area-Level Outcome Variable Operationalization                                                                                                                                                        | Unadjusted Effect Sizes                                                                                                                                                                                                                                                                                                                                                                                                                                                                                      | Risk of Bias                                                                                      |
|-------------------------------------|-----------------|-------------------|-------------------------|----------------------------------|----------------------------------------------------------------------------------------------------------------------------------------------------------------------------------------------------------------------------------------------------------------------------------------------------------------------------------------------------------------------------------------|----------------------------------------------------------------------------------------------------|------------------------------------------------------------------------------------------------------------------------------------------------------------------------------------------------------------------------------------------------------------------------------------------|-------------------------------------------------------------------------------------------------------------------------------------------------------------------------------------------------------|--------------------------------------------------------------------------------------------------------------------------------------------------------------------------------------------------------------------------------------------------------------------------------------------------------------------------------------------------------------------------------------------------------------------------------------------------------------------------------------------------------------|---------------------------------------------------------------------------------------------------|
| <b>Rodriguez 2013</b> <sup>44</sup> | Cross-sectional | USA (contiguous ) | Census tract (N=64,909) | Multiple regression              | U.S. Census (2000)<br><br>Log transformed and mean centered: <ul style="list-style-type: none"><li>• Proportion of black race</li><li>• Proportion of Hispanic ethnicity</li><li>• Proportion of families with income below the poverty level</li><li>• Proportion of women older than 25 years without a high school diploma or equivalent</li><li>• Average household size</li></ul> | Office of Management and Budget North American Industry Classification System (NAICS) codes (2007) | N=306,695<br><br>“...all likely points of sale for tobacco products, including establishments coded as tobacco stores, grocery stores, gas stations and convenience stores” p.350                                                                                                        | Adaptive bandwidth kernel density estimation (influence limited to 1,000 people; 25-km radius in sparsely populated areas): average count of tobacco retailers per 1,000 population (log transformed) | No unadjusted effect sizes reported.<br><br>“Furthermore, higher TOD was associated with larger proportions of blacks, Hispanics, women with low levels of education and with smaller household size. Urban-rural differences in the relation between demographics and TOD were found in all sociodemographic categories, with the exception of poverty, but were particularly striking for Hispanics, for whom the relation with TOD was 10 times larger in urban compared with rural census tracts.” P.349 | 2: Yes<br><br>11: Yes<br>13: Yes<br><br>18: Yes<br>20: Yes<br><br>NA1: No<br>NA2: Yes<br>Total: 6 |
| <b>Rodriguez 2014</b> <sup>45</sup> | Cross-sectional | USA (contiguous ) | Census tract (N=64,909) | Latent variable mixture modeling | U.S. Census (2000) <ul style="list-style-type: none"><li>• Proportion of Blacks</li><li>• Proportion of Hispanics</li><li>• Families with income below the poverty level</li></ul>                                                                                                                                                                                                     | Office of Management and Budget North American Industry Classification System (NAICS) codes (2007) | N=306,695<br><br>NAICS codes specified: Beer, wine, and liquor stores, Convenience stores, Drinking places (alcoholic beverages), Other gasoline stations, Supermarkets and other grocery (except convenience) stores<br><br>“...all likely points of sale for tobacco products in 2007, | Adaptive bandwidth kernel density estimation (influence limited to 1,000 people; 25-km radius in sparsely populated areas): average count of tobacco retailers per 1,000 population (log transformed) | No unadjusted effect sizes reported.<br><br>“We identified six disparity classes. There was considerable heterogeneity in relation to TOD for Hispanics in rural settings. For Blacks, there was no relation to TOD in an urban moderate disparity class, and for rural census tracts, the relation was highest in a moderate disparity class.” P.155                                                                                                                                                        | 2: Yes<br><br>11: Yes<br>13: Yes<br><br>18: Yes<br>20: Yes<br><br>NA1: No<br>NA2: Yes<br>Total: 6 |

**Notes:** We used a modified Downs and Black checklist to assess the risk of bias (see online repository protocol). We created a risk of bias index (0-7, with higher numbers indicating higher risk of bias) and *a priori* planned to exclude any studies with a score of 4 or higher (none were excluded).  
*Italicized records* represent records or effect sizes that were excluded from synthesis and analysis because they 1) were combined with another record or 2) only reported adjusted effect sizes.  
\*These two studies used similar methods to examine identical relationships with the same data, so only the first published study was included for analysis  
ES=Effect Size

| Author (Year), ID            | Study Design    | Study Location                | Unit of Analysis (N)                             | Statistical Approach                                            | Data Source (Year): Area-Level Sociodemographic Variable                                          | Data Source (Year): Tobacco Retailers                                                                  | Number and Type of Tobacco Retailers Included                                                                                       | Area-Level Outcome Variable Operationalization | Unadjusted Effect Sizes                                                                                                | Risk of Bias                                                                                      |
|------------------------------|-----------------|-------------------------------|--------------------------------------------------|-----------------------------------------------------------------|---------------------------------------------------------------------------------------------------|--------------------------------------------------------------------------------------------------------|-------------------------------------------------------------------------------------------------------------------------------------|------------------------------------------------|------------------------------------------------------------------------------------------------------------------------|---------------------------------------------------------------------------------------------------|
|                              |                 |                               |                                                  |                                                                 |                                                                                                   |                                                                                                        | <i>including establishments coded as tobacco stores, grocery stores, gas stations, and convenience stores...</i> ”<br><i>p. 156</i> |                                                |                                                                                                                        |                                                                                                   |
| Schneider 2005 <sup>46</sup> | Cross-sectional | Polk County (Iowa)<br><br>USA | Census tract (N=80)                              | Analysis of Variance (ANOVA) comparing tobacco retailer density | Census (2000)<br><br>Median household income (quartiles)                                          | Tobacco Enforcement Section of Iowa’s Alcoholic Beverages Division (2003)                              | N=474<br><br>All licensed tobacco retailers                                                                                         | Count of tobacco retailers per 10km of roadway | ES1: F=4.56, p</=0.05<br><br>Q1 (<\$35,106): 1.6<br>Q2 (<\$44,853): 1.5<br>Q3 (<\$55,999): 0.8<br>Q4 (>=\$55,999): 0.8 | 2: Yes<br><br>11: Yes<br>13: No<br><br>18: Yes<br>20: Yes<br><br>NA1: Yes<br>NA2: Yes<br>Total: 6 |
|                              |                 |                               |                                                  |                                                                 | Percent African American (quartiles)                                                              |                                                                                                        |                                                                                                                                     |                                                | ES2: F=3.46, p</=0.05<br><br>Q1 (>5.4): 1.5<br>Q2 (>2.4): 1.3<br>Q3 (>1.1): 1.2<br>Q4 (</=1.1): 0.6                    |                                                                                                   |
|                              |                 |                               |                                                  |                                                                 | Percent Latino (quartiles)                                                                        |                                                                                                        |                                                                                                                                     |                                                | ES3: F=3.45, p</=0.05<br><br>Q1 (>6.6): 1.5<br>Q2 (>3.0): 1.4<br>Q3 (>1.5): 1.1<br>Q4 (</=1.5): 0.7                    |                                                                                                   |
| Schneider 2013 <sup>47</sup> | Cross-sectional | Cologne<br><br>Germany        | Social areas (n=18 in four districts of Cologne) | Kendall’s $\tau_b$ correlation                                  | Data source and year unclear<br><br>Percentage of parents with a joint annual taxable income of < | Ground-truthed tobacco retailers (December 2009): “As the locations of the outlets of interest are not | N=339<br><br>Supermarkets, shops, kiosks, gas stations, catering venues (e.g., restaurants, bars),                                  | Count of tobacco retailers                     | ES1: $\tau_b$ : 0.433, p=0.012                                                                                         | 2: Yes<br><br>11: No<br>13: No<br><br>18: Yes                                                     |

**Notes:** We used a modified Downs and Black checklist to assess the risk of bias (see online repository protocol). We created a risk of bias index (0-7, with higher numbers indicating higher risk of bias) and *a priori* planned to exclude any studies with a score of 4 or higher (none were excluded).

*Italicized records* represent records or effect sizes that were excluded from synthesis and analysis because they 1) were combined with another record or 2) only reported adjusted effect sizes.

\*These two studies used similar methods to examine identical relationships with the same data, so only the first published study was included for analysis

ES=Effect Size



| Author (Year), ID | Study Design | Study Location | Unit of Analysis (N) | Statistical Approach | Data Source (Year): Area-Level Sociodemographic Variable                                                                                | Data Source (Year): Tobacco Retailers                                                                                                                  | Number and Type of Tobacco Retailers Included                                                                                                                                | Area-Level Outcome Variable Operationalization | Unadjusted Effect Sizes                                             | Risk of Bias                                    |
|-------------------|--------------|----------------|----------------------|----------------------|-----------------------------------------------------------------------------------------------------------------------------------------|--------------------------------------------------------------------------------------------------------------------------------------------------------|------------------------------------------------------------------------------------------------------------------------------------------------------------------------------|------------------------------------------------|---------------------------------------------------------------------|-------------------------------------------------|
|                   |              |                |                      |                      | €12,272 (year not specified)                                                                                                            | officially registered, all streets and squares within the defined study area were covered during usual opening hours on foot or by bicycle.” (p. 1169) | service stations, drugstore chains, owner-managed shops and kiosks, cigarette vending machines, including those in service establishments (e.g., bars, pubs, or restaurants) |                                                |                                                                     | 20: Yes<br><br>NA1: Yes<br>NA2: Yes<br>Total: 5 |
|                   |              |                |                      |                      | Data source and year unclear<br><br>Whether district percentage of low-income parents was greater or less than 32% (year not specified) |                                                                                                                                                        |                                                                                                                                                                              |                                                | ES2: $\tau_\beta$ : -2.22, $p=0.041$                                |                                                 |
|                   |              |                |                      |                      | Data source unclear (2007)<br><br>Youth unemployment rates                                                                              |                                                                                                                                                        |                                                                                                                                                                              |                                                | ES3: $\tau_\beta$ : 0.322, $p=\text{not statistically significant}$ |                                                 |
|                   |              |                |                      |                      | Data source unclear (2007)<br><br>Proportion of the population receiving social welfare                                                 |                                                                                                                                                        |                                                                                                                                                                              |                                                | ES4: $\tau_\beta$ : 0.289, $p=\text{not statistically significant}$ |                                                 |
|                   |              |                |                      |                      | Data source unclear (2007)<br><br>Percentage of pupils attending low-qualifying schools                                                 |                                                                                                                                                        |                                                                                                                                                                              |                                                | ES3: $\tau_\beta$ : 0.268, $p=\text{not statistically significant}$ |                                                 |

**Notes:** We used a modified Downs and Black checklist to assess the risk of bias (see online repository protocol). We created a risk of bias index (0-7, with higher numbers indicating higher risk of bias) and *a priori* planned to exclude any studies with a score of 4 or higher (none were excluded).

*Italicized records* represent records or effect sizes that were excluded from synthesis and analysis because they 1) were combined with another record or 2) only reported adjusted effect sizes.

\*These two studies used similar methods to examine identical relationships with the same data, so only the first published study was included for analysis

ES=Effect Size



| Author (Year), ID                   | Study Design    | Study Location                 | Unit of Analysis (N) | Statistical Approach                                                     | Data Source (Year): Area-Level Sociodemographic Variable                                                                                                                                                                                                                                                                                                                                                                                       | Data Source (Year): Tobacco Retailers                                                                                                                                | Number and Type of Tobacco Retailers Included                        | Area-Level Outcome Variable Operationalization                                                                                                                                                                                           | Unadjusted Effect Sizes                                                                                                                                                                                                  | Risk of Bias                                                                                       |
|-------------------------------------|-----------------|--------------------------------|----------------------|--------------------------------------------------------------------------|------------------------------------------------------------------------------------------------------------------------------------------------------------------------------------------------------------------------------------------------------------------------------------------------------------------------------------------------------------------------------------------------------------------------------------------------|----------------------------------------------------------------------------------------------------------------------------------------------------------------------|----------------------------------------------------------------------|------------------------------------------------------------------------------------------------------------------------------------------------------------------------------------------------------------------------------------------|--------------------------------------------------------------------------------------------------------------------------------------------------------------------------------------------------------------------------|----------------------------------------------------------------------------------------------------|
| <i>Schwar tz 2021</i> <sup>48</sup> | Cross-sectional | Ohio (13 cities)<br><br>USA    | Subregions (N=3,846) | General estimating equations/negative binomial regression                | 5-year American Community Survey (2016)<br><br>• Percent African American (dichotomized into “High” vs. “Low” prevalence if 15% or more of the population was African American) p. 2<br>• Percent Hispanic (dichotomized into “High” vs. “Low” prevalence if 15% or more of the population was Hispanic) p. 2<br>• Poverty (dichotomized into “High” vs. “Low” prevalence if 15.4% or more of the population was below the poverty level) p. 2 | Licensed cigarette retailers: Ohio’s 88 county auditor offices (fall of 2017)<br><br>Hookah cafes and vape shops: Internet directories (i.e., Yelp, Yellowpages.com) | N=5,548<br><br>(5,379 cigarette licenses and 169 vape/hookah stores) | Count of tobacco retailers per 1,000 people                                                                                                                                                                                              | No unadjusted effect sizes.<br><br>“Findings indicated that as grades increased from “Best” to “Still Desirable” to “Definitely Declining” and “Hazardous,” retailer density increased monotonically.” P.1               | 2: Yes<br><br>11: Yes<br>13: No<br><br>18: Yes<br>20: Yes<br><br>NA1: Yes<br>NA2: Yes<br>Total: 7  |
| <b>Shortt 2015</b> <sup>49</sup>    | Cross-sectional | Scotland<br><br>United Kingdom | Data zones (N=6,502) | Analysis of variance (ANOVA) comparing mean (μ) tobacco retailer density | Scottish Index of Multiple Deprivation (2012): income deprivation domain (i.e., the proportion of the population experiencing income deprivation as measured by five indicators, including households included in income deprivation domain; adults and                                                                                                                                                                                        | Scottish Tobacco Retailers Register (September 2012)                                                                                                                 | N=10,161<br><br>All registered retailers selling tobacco products    | Tobacco outlets per 10,000 population (Kernel density estimation, which “divides Scotland into 100x100 m grid cells, and assesses the number and proximity of outlets within an 800 m radius for each cell.” The authors then calculated | ES1: p<0.001<br>Q1 (least deprived): μ: 49.6, 95% CI: 44.2-54.9<br>Q2: μ: 64.3, 95% CI: 56.1-72.5<br>Q3: μ: 86.1, 95% CI: 79.7-92.6<br>Q4: μ: 94.6, 95% CI: 89.7-99.5<br>Q5 (most deprived): μ: 99.9, 95% CI: 95.1-104.7 | 2: Yes<br><br>11: Yes<br>13: Yes<br><br>18: Yes<br>20: Yes<br><br>NA1: Yes<br>NA2: Yes<br>Total: 7 |

**Notes:** We used a modified Downs and Black checklist to assess the risk of bias (see online repository protocol). We created a risk of bias index (0-7, with higher numbers indicating higher risk of bias) and *a priori* planned to exclude any studies with a score of 4 or higher (none were excluded).

*Italicized records* represent records or effect sizes that were excluded from synthesis and analysis because they 1) were combined with another record or 2) only reported adjusted effect sizes.

<sup>†</sup>These two studies used similar methods to examine identical relationships with the same data, so only the first published study was included for analysis

ES=Effect Size

| Author (Year), ID            | Study Design    | Study Location                                | Unit of Analysis (N) | Statistical Approach                       | Data Source (Year): Area-Level Sociodemographic Variable                                                                                                                                                                                                           | Data Source (Year): Tobacco Retailers                                                                                                                                                                                                                                                                                                    | Number and Type of Tobacco Retailers Included         | Area-Level Outcome Variable Operationalization                      | Unadjusted Effect Sizes           | Risk of Bias                                                                                      |
|------------------------------|-----------------|-----------------------------------------------|----------------------|--------------------------------------------|--------------------------------------------------------------------------------------------------------------------------------------------------------------------------------------------------------------------------------------------------------------------|------------------------------------------------------------------------------------------------------------------------------------------------------------------------------------------------------------------------------------------------------------------------------------------------------------------------------------------|-------------------------------------------------------|---------------------------------------------------------------------|-----------------------------------|---------------------------------------------------------------------------------------------------|
|                              |                 |                                               |                      |                                            | children in Income Support households; adults and children in Job Seekers Allowance households; adults in Guarantee Pension Credit households; adults and children in Tax Credit Households on low incomes), quintiles [Q] where 1=least deprived, 5=most deprived |                                                                                                                                                                                                                                                                                                                                          |                                                       | population-weighted outlet density values.) (p.2)                   |                                   |                                                                                                   |
| Siahpu sh 2010 <sup>50</sup> | Cross-sectional | Omaha Metropolitan Area (Nebraska)<br><br>USA | Census tract (n=94)  | Linear regression, Adjusted R <sup>2</sup> | Census (2000)<br><br>Median household income (scaled to \$10,000)                                                                                                                                                                                                  | City of Omaha, licensed tobacco retailers (October 2008)<br><br>InfoUSA: denominator of percentage of stores that sold tobacco outcome variable: “the number of all businesses in a neighbourhood that sold a product or provided a service to the public, including retail stores, travel agencies and dentists” p. 526 (February 2009) | N not specified<br><br>All licensed tobacco retailers | Percentage of stores that sold tobacco (natural log transformation) | ES1: Coefficient: -0.012, p<0.001 | 2: Yes<br><br>11: Yes<br>13: No<br><br>18: Yes<br>20: Yes<br><br>NA1: Yes<br>NA2: Yes<br>Total: 6 |
|                              |                 |                                               |                      |                                            | Median household income (scaled to \$10,000)                                                                                                                                                                                                                       |                                                                                                                                                                                                                                                                                                                                          |                                                       | Count of tobacco retailers per square                               | ES4: Coefficient: -0.018, p<0.001 |                                                                                                   |

**Notes:** We used a modified Downs and Black checklist to assess the risk of bias (see online repository protocol). We created a risk of bias index (0-7, with higher numbers indicating higher risk of bias) and *a priori* planned to exclude any studies with a score of 4 or higher (none were excluded).

*Italicized records* represent records or effect sizes that were excluded from synthesis and analysis because they 1) were combined with another record or 2) only reported adjusted effect sizes.

\*These two studies used similar methods to examine identical relationships with the same data, so only the first published study was included for analysis

ES=Effect Size

| Author (Year), ID         | Study Design    | Study Location                          | Unit of Analysis (N) | Statistical Approach | Data Source (Year): Area-Level Sociodemographic Variable                                                                                                                  | Data Source (Year): Tobacco Retailers                                        | Number and Type of Tobacco Retailers Included         | Area-Level Outcome Variable Operationalization                           | Unadjusted Effect Sizes          | Risk of Bias |
|---------------------------|-----------------|-----------------------------------------|----------------------|----------------------|---------------------------------------------------------------------------------------------------------------------------------------------------------------------------|------------------------------------------------------------------------------|-------------------------------------------------------|--------------------------------------------------------------------------|----------------------------------|--------------|
|                           |                 |                                         |                      |                      |                                                                                                                                                                           |                                                                              |                                                       | miles (natural log transformation)                                       |                                  |              |
|                           |                 |                                         |                      |                      | Percentage African American population (scaled to 10s)                                                                                                                    |                                                                              |                                                       | Percentage of stores that sold tobacco (natural log transformation)      | ES2: Coefficient: 0.011, p<0.001 |              |
|                           |                 |                                         |                      |                      | Percentage African American population (scaled to 10s)                                                                                                                    |                                                                              |                                                       | Count of tobacco retailers per square miles (natural log transformation) | ES5: Coefficient: 0.004, p=0.297 |              |
|                           |                 |                                         |                      |                      | Percentage Hispanic population (scaled to 10s)                                                                                                                            |                                                                              |                                                       | Percentage of stores that sold tobacco (natural log transformation)      | ES3: Coefficient: 0.009, p=0.049 |              |
|                           |                 |                                         |                      |                      | Percentage Hispanic population (scaled to 10s)                                                                                                                            |                                                                              |                                                       | Count of tobacco retailers per square miles (natural log transformation) | ES6: Coefficient: 0.019, p=0.012 |              |
| Siegel 2019 <sup>51</sup> | Cross-sectional | New Castle County (Delaware)<br><br>USA | Census tract (N=130) | T-tests              | American Community Survey (year not specified)<br><br>“High poverty”: percentage of residents who lived below the poverty line was >/= 75 <sup>th</sup> percentile (p. 2) | Public state business license database (exact source and year not specified) | N not specified<br><br>All licensed tobacco retailers | Count of tobacco retailers per 1,000 adults                              | ES1: 3.37 vs. 1.42, p<0.001      |              |
|                           |                 |                                         |                      |                      | “Predominant minority”: non-white racial or ethnic group constituted the highest proportion of the tract population (p. 2)                                                |                                                                              |                                                       |                                                                          | ES2: 3.21 vs. 1.56, p<0.001      |              |
|                           |                 |                                         |                      |                      | “High poverty and predominant minority”                                                                                                                                   |                                                                              |                                                       |                                                                          | ES3: 3.45 vs. 1.61, p<0.001      |              |

**Notes:** We used a modified Downs and Black checklist to assess the risk of bias (see online repository protocol). We created a risk of bias index (0-7, with higher numbers indicating higher risk of bias) and *a priori* planned to exclude any studies with a score of 4 or higher (none were excluded).  
*Italicized records* represent records or effect sizes that were excluded from synthesis and analysis because they 1) were combined with another record or 2) only reported adjusted effect sizes.  
\*These two studies used similar methods to examine identical relationships with the same data, so only the first published study was included for analysis  
ES=Effect Size

| Author (Year), ID                | Study Design    | Study Location          | Unit of Analysis (N) | Statistical Approach                    | Data Source (Year): Area-Level Sociodemographic Variable                                                                                                                                                                                      | Data Source (Year): Tobacco Retailers                                           | Number and Type of Tobacco Retailers Included   | Area-Level Outcome Variable Operationalization                                                | Unadjusted Effect Sizes                                      | Risk of Bias                                                                                      |
|----------------------------------|-----------------|-------------------------|----------------------|-----------------------------------------|-----------------------------------------------------------------------------------------------------------------------------------------------------------------------------------------------------------------------------------------------|---------------------------------------------------------------------------------|-------------------------------------------------|-----------------------------------------------------------------------------------------------|--------------------------------------------------------------|---------------------------------------------------------------------------------------------------|
|                                  |                 |                         |                      |                                         | “High poverty”: percentage of residents who lived below the poverty line was >= 75 <sup>th</sup> percentile<br><br>“Predominant minority”: non-white racial or ethnic group constituted the highest proportion of the tract population (p. 2) |                                                                                 |                                                 |                                                                                               |                                                              |                                                                                                   |
| Tucker-Seeley 2016 <sup>52</sup> | Cross-sectional | Rhode Island<br><br>USA | Census tract (N=240) | Ordinary least squares (OLS) regression | U.S. Census (2010); American Community Survey (2007-2011)<br><br>Median household income (per \$10,000 increase)                                                                                                                              | Cigarette licensing list created and maintained by tax administrator (May 2015) | N=1,334<br><br>All licensed cigarette retailers | Count of tobacco retailers per 10km of roadway (log-transformed after adding a constant of 1) | ES1: B: -0.198, 95% CI: -0.222, 0.173; r <sup>2</sup> =0.51  | 2: Yes<br><br>11: Yes<br>13: No<br><br>18: Yes<br>20: Yes<br><br>NA1: Yes<br>NA2: Yes<br>Total: 6 |
|                                  |                 |                         |                      |                                         | Percent of adults with a high school diploma or greater                                                                                                                                                                                       |                                                                                 |                                                 | Count of tobacco retailers per 10km of roadway                                                | ES2: B: -0.038, 95% CI: -0.043, -0.033; r <sup>2</sup> =0.49 |                                                                                                   |
|                                  |                 |                         |                      |                                         | Percent Hispanic residents                                                                                                                                                                                                                    |                                                                                 |                                                 | Count of tobacco retailers per 10km of roadway                                                | ES3: B: 0.036, 95% CI: 0.029, 0.044; r <sup>2</sup> =0.28    |                                                                                                   |
|                                  |                 |                         |                      |                                         | Percent African American/Black residents                                                                                                                                                                                                      |                                                                                 |                                                 | Count of tobacco retailers per 10km of roadway                                                | ES4: B: 0.023, 95% CI: 0.020, 0.027; r <sup>2</sup> =0.41    |                                                                                                   |
|                                  |                 |                         |                      |                                         | Percent of families in poverty                                                                                                                                                                                                                |                                                                                 |                                                 | Count of tobacco retailers per 10km of roadway                                                | ES5: B: 0.033, 95% CI: 0.028, 0.039; r <sup>2</sup> =0.38    |                                                                                                   |

**Notes:** We used a modified Downs and Black checklist to assess the risk of bias (see online repository protocol). We created a risk of bias index (0-7, with higher numbers indicating higher risk of bias) and *a priori* planned to exclude any studies with a score of 4 or higher (none were excluded).  
*Italicized records* represent records or effect sizes that were excluded from synthesis and analysis because they 1) were combined with another record or 2) only reported adjusted effect sizes.  
\*These two studies used similar methods to examine identical relationships with the same data, so only the first published study was included for analysis  
ES=Effect Size

| Author (Year), ID          | Study Design    | Study Location | Unit of Analysis (N)   | Statistical Approach                | Data Source (Year): Area-Level Sociodemographic Variable                                                                                                                                                                                                                                                                                                                                                                                            | Data Source (Year): Tobacco Retailers                                                                                                                                                                                                                                                                                                                                        | Number and Type of Tobacco Retailers Included                                                                                                                                                                                   | Area-Level Outcome Variable Operationalization | Unadjusted Effect Sizes                             | Risk of Bias                                                                                          |
|----------------------------|-----------------|----------------|------------------------|-------------------------------------|-----------------------------------------------------------------------------------------------------------------------------------------------------------------------------------------------------------------------------------------------------------------------------------------------------------------------------------------------------------------------------------------------------------------------------------------------------|------------------------------------------------------------------------------------------------------------------------------------------------------------------------------------------------------------------------------------------------------------------------------------------------------------------------------------------------------------------------------|---------------------------------------------------------------------------------------------------------------------------------------------------------------------------------------------------------------------------------|------------------------------------------------|-----------------------------------------------------|-------------------------------------------------------------------------------------------------------|
| Wheeler 2020 <sup>53</sup> | Cross-sectional | Virginia USA   | Census tract (N=1,820) | Bayesian spatial Poisson regression | 5-year American Community Survey (2012-2016)<br><br>Created socioeconomic status index comprised of 12 weighted variables: Gini index of income inequality; % black population; % with bachelor's degree; % families in poverty; % households with public assistance income; % vacant housing units; % renter occupied housing units; median household income; median gross rent; median monthly housing costs; % Hispanic population, % US citizen | Ground-truthing (via driving every primary and secondary road) to identify retailers from publicly available data and protocol developed by Virginia Department of Behavioral Health and Developmental Services and CounterTools (2016-2018)<br><br>Study authors used websites to confirm store types in December 2018 (Google Maps, Yelp, Yellow Pages, business websites) | Tobacco retailers (N=5600)                                                                                                                                                                                                      | Count of tobacco retailers                     | ES1: Relative risk: 1.22, 95% CI: 1.19, 1.27        | 2: Yes<br><br>11: Yes<br>13: No<br><br>18: Yes<br>20: Yes<br><br>NA1: Yes<br>NA2: Yes<br><br>Total: 6 |
|                            |                 |                |                        |                                     | Created socioeconomic status index comprised of 12 weighted variables: Gini index of income inequality; % black population; % with bachelor's degree; % families in poverty; % households with public assistance income; % vacant housing units; % renter occupied housing                                                                                                                                                                          |                                                                                                                                                                                                                                                                                                                                                                              | <i>Vape shop retailers ("specialty shops", p. 2) (N=167)</i><br><br><i>Store types: convenience stores and gas stations; grocery stores; mass merchandisers; drug stores or pharmacies; tobacco shops; e-cigarette and vape</i> | <i>Count of vape shop retailers</i>            | <i>ES2: Relative risk: 1.20, 95% CI: 1.05, 1.38</i> |                                                                                                       |

**Notes:** We used a modified Downs and Black checklist to assess the risk of bias (see online repository protocol). We created a risk of bias index (0-7, with higher numbers indicating higher risk of bias) and *a priori* planned to exclude any studies with a score of 4 or higher (none were excluded).

*Italicized records* represent records or effect sizes that were excluded from synthesis and analysis because they 1) were combined with another record or 2) only reported adjusted effect sizes.

\*These two studies used similar methods to examine identical relationships with the same data, so only the first published study was included for analysis

ES=Effect Size

| Author (Year), ID                                                           | Study Design    | Study Location                     | Unit of Analysis (N)                                         | Statistical Approach                                                     | Data Source (Year): Area-Level Sociodemographic Variable                                                                                                                                                                                                                                                                                                                                                                                                                       | Data Source (Year): Tobacco Retailers                                                                | Number and Type of Tobacco Retailers Included      | Area-Level Outcome Variable Operationalization  | Unadjusted Effect Sizes                                                                                                                                                                                                                                                                                              | Risk of Bias                                                                                     |
|-----------------------------------------------------------------------------|-----------------|------------------------------------|--------------------------------------------------------------|--------------------------------------------------------------------------|--------------------------------------------------------------------------------------------------------------------------------------------------------------------------------------------------------------------------------------------------------------------------------------------------------------------------------------------------------------------------------------------------------------------------------------------------------------------------------|------------------------------------------------------------------------------------------------------|----------------------------------------------------|-------------------------------------------------|----------------------------------------------------------------------------------------------------------------------------------------------------------------------------------------------------------------------------------------------------------------------------------------------------------------------|--------------------------------------------------------------------------------------------------|
|                                                                             |                 |                                    |                                                              |                                                                          | units; median household income; median ross rent; median monthly housing costs; % Hispanic population, % US citizen                                                                                                                                                                                                                                                                                                                                                            |                                                                                                      | <i>shops; bars and restaurants; hookah lounges</i> |                                                 |                                                                                                                                                                                                                                                                                                                      |                                                                                                  |
| <b>Wheeler 2022</b> <sup>54</sup><br><br><i>Wheeler 2022</i> <sup>55+</sup> | Cross-sectional | North Carolina<br><br>USA          | Block group (N=6,083 )                                       | Bayesian hierarchical regression                                         | 5-year American Community Survey (2014-2018)<br><br>Created neighborhood disadvantage index comprised of 9 weighted variables: Black population segregation; Hispanic population segregation; percent with ratio of income to poverty level <1; percent households with public assistance income; percent renter occupied housing units; percent homes built 1939 or earlier; percent with no high school degree or higher; percent of household in poverty; per capita income | National Establishment Time Series (2019), using North American Industry Classification System codes | N=7,279<br><br>All tobacco retailers               | Count of tobacco retailers                      | ES1: Relative risk: 1.12, 95% credible interval: 1.09-1.14<br><br><i>A later manuscript (Wheeler, #8604) used similar methods to examine identical relationships but accounts for spatially varying effects, finding “The results revealed substantial variation in NDI effects that varied by outlet type.” p.1</i> | 2: Yes<br><br>11: Yes<br>13: No<br><br>18: Yes<br>20: Yes<br><br>NA1: No<br>NA2: Yes<br>Total: 5 |
| <b>Wood 2013</b> <sup>56</sup>                                              | Cross-sectional | Western Australia<br><br>Australia | 1) All Western Australia suburbs and towns (N=911); 2) Perth | Negative binomial regression with offset of usual residential population | Australian Bureau of statistics (ABS) Index of Relative Socioeconomic Advantage and Disadvantage (IRSAD) (2006) where lower                                                                                                                                                                                                                                                                                                                                                    | Western Australia Department of Health by Cancer Council Western Australia (May 2011)                | N not specified<br><br>All tobacco retailers       | Count of tobacco retailers per 10,000 residents | All Western Australia suburbs and towns (N=911); IRSAD quartiled percentiles:<br><br>ES1: Very low (<25 <sup>th</sup> ): RR: 4.14, 95% CI: 3.00, 5.71, p<0.001                                                                                                                                                       | 2: Yes<br><br>11: Yes<br>13: Yes<br><br>18: Yes                                                  |

**Notes:** We used a modified Downs and Black checklist to assess the risk of bias (see online repository protocol). We created a risk of bias index (0-7, with higher numbers indicating higher risk of bias) and *a priori* planned to exclude any studies with a score of 4 or higher (none were excluded).

*Italicized records* represent records or effect sizes that were excluded from synthesis and analysis because they 1) were combined with another record or 2) only reported adjusted effect sizes.

<sup>+</sup>These two studies used similar methods to examine identical relationships with the same data, so only the first published study was included for analysis

ES=Effect Size

| Author (Year), ID | Study Design | Study Location | Unit of Analysis (N)                                                          | Statistical Approach | Data Source (Year): Area-Level Sociodemographic Variable                                                                    | Data Source (Year): Tobacco Retailers | Number and Type of Tobacco Retailers Included | Area-Level Outcome Variable Operationalization | Unadjusted Effect Sizes                                                                                                                                                                                                                                                                                                                                                                                                                                                                                                                                                                                                                                                                                                                                                                                                                                                                                                                                                                                                                          | Risk of Bias                                    |
|-------------------|--------------|----------------|-------------------------------------------------------------------------------|----------------------|-----------------------------------------------------------------------------------------------------------------------------|---------------------------------------|-----------------------------------------------|------------------------------------------------|--------------------------------------------------------------------------------------------------------------------------------------------------------------------------------------------------------------------------------------------------------------------------------------------------------------------------------------------------------------------------------------------------------------------------------------------------------------------------------------------------------------------------------------------------------------------------------------------------------------------------------------------------------------------------------------------------------------------------------------------------------------------------------------------------------------------------------------------------------------------------------------------------------------------------------------------------------------------------------------------------------------------------------------------------|-------------------------------------------------|
|                   |              |                | metropolitan suburbs (N=296); 3) Regional areas/centers outside Perth (N=608) |                      | values represent more disadvantage<br><br>2006 Census: suburb or town population (used in tobacco retailer density measure) |                                       |                                               |                                                | ES2: Low (25 <sup>th</sup> to <50 <sup>th</sup> ): RR: 2.12, 95% CI: 1.55, 2.92, p<0.001<br>ES3: High (50 <sup>th</sup> to <75 <sup>th</sup> ): RR: 1.43, 95% CI: 1.15, 1.79, p<0.001<br>Very high (>=75 <sup>th</sup> ): 1.00 (ref)<br><br>Perth metropolitan suburbs (N=296); IRSAD quartiled percentiles:<br><br>ES4: Very low (<25 <sup>th</sup> ): RR: 1.48, 95% CI: 1.17, 1.87, p<0.001<br>ES5: Low (25 <sup>th</sup> to <50 <sup>th</sup> ): RR: 1.19, 95% CI: 0.94, 1.52, p=0.157<br>ES6: High (50 <sup>th</sup> to <75 <sup>th</sup> ): RR: 1.10, 95% CI: 0.87, 1.40, p=0.430<br>Very high (>=75 <sup>th</sup> ): 1.00 (ref)<br><br>Regional areas/centers outside Perth (N=608); IRSAD quartiled percentiles:<br><br>ES7: Very low (<25 <sup>th</sup> ): RR: 5.51, 95% CI: 4.12, 7.36, p<0.001<br>ES8: Low (25 <sup>th</sup> to <50 <sup>th</sup> ): RR: 2.60, 95% CI: 2.00, 3.38, p<0.001<br>ES9: High (50 <sup>th</sup> to <75 <sup>th</sup> ): RR: 1.87, 95% CI: 1.34, 2.60, p<0.001<br>Very high (>=75 <sup>th</sup> ): 1.00 (ref) | 20: Yes<br><br>NA1: Yes<br>NA2: Yes<br>Total: 7 |

**Notes:** We used a modified Downs and Black checklist to assess the risk of bias (see online repository protocol). We created a risk of bias index (0-7, with higher numbers indicating higher risk of bias) and *a priori* planned to exclude any studies with a score of 4 or higher (none were excluded).

*Italicized records* represent records or effect sizes that were excluded from synthesis and analysis because they 1) were combined with another record or 2) only reported adjusted effect sizes.

\*These two studies used similar methods to examine identical relationships with the same data, so only the first published study was included for analysis

ES=Effect Size

| Author (Year), ID            | Study Design    | Study Location    | Unit of Analysis (N)   | Statistical Approach      | Data Source (Year): Area-Level Sociodemographic Variable                                                                                                                              | Data Source (Year): Tobacco Retailers    | Number and Type of Tobacco Retailers Included  | Area-Level Outcome Variable Operationalization                                                        | Unadjusted Effect Sizes                                                                                                                                                                                                                                                                                                                                                                                         | Risk of Bias                                                                                      |
|------------------------------|-----------------|-------------------|------------------------|---------------------------|---------------------------------------------------------------------------------------------------------------------------------------------------------------------------------------|------------------------------------------|------------------------------------------------|-------------------------------------------------------------------------------------------------------|-----------------------------------------------------------------------------------------------------------------------------------------------------------------------------------------------------------------------------------------------------------------------------------------------------------------------------------------------------------------------------------------------------------------|---------------------------------------------------------------------------------------------------|
| <b>Yu 2009</b> <sup>57</sup> | Cross-sectional | New Jersey<br>USA | Census tract (N=1,938) | Adjusted R <sup>2</sup>   | Census (2000)<br><br>Percentage of African American residents<br><br>Percentage of Hispanic (or Latino) residents<br><br>Median household income                                      | New Jersey Department of Treasury (2004) | N=15,037<br><br>All licensed tobacco retailers | Count of tobacco retailers per 10 kilometers of roadway                                               | No unadjusted effect sizes reported.<br><br>“When GWR is estimated using the raw data, we find that there is no significant spatial variation of the coefficients between tobacco outlet density and percentage of African American and Hispanics. After transforming the dependent variable and making the residual asymptotically normal, all coefficients exhibit significant variation across space.” p.329 | 2: Yes<br><br>11: Yes<br>13: No<br><br>18: Yes<br>20: Yes<br><br>NA1: Yes<br>NA2: Yes<br>Total: 6 |
| <b>Yu 2010</b> <sup>58</sup> | Cross-sectional | New Jersey<br>USA | Census tract (N=1,938) | Spatial linear regression | Census (2000) <ul style="list-style-type: none"><li>• Median household income</li><li>• Percentage of African American residents</li><li>• Percentage of Hispanic residents</li></ul> | New Jersey Department of Treasury (2004) | N=13,984<br><br>All licensed tobacco retailers | Count of tobacco retailers per 10 kilometers of road (base 10 log transformation of outcome variable) | No unadjusted effect sizes reported.<br><br>“In New Jersey, the percentage of Hispanics seems to be the dominant demographic factor associated with tobacco outlet distribution, followed by median household income and percentage of African Americans.” p.412                                                                                                                                                | 2: Yes<br><br>11: Yes<br>13: No<br><br>18: Yes<br>20: Yes<br><br>NA1: Yes<br>NA2: Yes<br>Total: 6 |

**Notes:** We used a modified Downs and Black checklist to assess the risk of bias (see online repository protocol). We created a risk of bias index (0-7, with higher numbers indicating higher risk of bias) and *a priori* planned to exclude any studies with a score of 4 or higher (none were excluded).

*Italicized records* represent records or effect sizes that were excluded from synthesis and analysis because they 1) were combined with another record or 2) only reported adjusted effect sizes.

<sup>†</sup>These two studies used similar methods to examine identical relationships with the same data, so only the first published study was included for analysis

ES=Effect Size



REFERENCES

1. Adachi-Mejia AM, Carlos HA, Berke EM, Tanski SE, Sargent JD. A comparison of individual versus community influences on youth smoking behaviours: a cross-sectional observational study. *BMJ Open*.2012;2(5):e000767. doi:10.1136/bmjopen-2011-000767
2. Adibe C, Craigmile PF, Onnen N, Schwartz E, Roberts ME. The relationship between tobacco retailer density and neighborhood demographics in Ohio. *Ohio Journal of Public Health*.2019;2(1):12-18.
3. Anesetti-Rothermel A, Herman P, Bennett M, et al. Sociodemographic disparities in the tobacco retail environment in Washington, DC: a spatial perspective. *Ethn Dis* 2020;30:479–88.
4. Berg CJ, Schleicher NC, Johnson TO, et al. Vape shop identification, density and place characteristics in six metropolitan areas across the US. *Preventive Medicine Reports*.2020;19:101137. doi:10.1016/j.pmedr.2020.101137
5. Bostean G, Sánchez LA, Douglas JA. Spatial disparities: the role of nativity in neighborhood exposure to alcohol and tobacco retailers. *Journal of Immigrant and Minority Health*.2022;24(4):945-955. doi:10.1007/s10903-021-01277-6
6. Caryl FM, Pearce J, Reid G, Mitchell R, Shortt NK. Simulating the density reduction and equity impact of potential tobacco retail control policies. *Tobacco Control*.2021;30(e2):e138-e143. doi:10.1136/tobaccocontrol-2020-056002
7. Chaiton MO, Mecredy GC, Cohen JE, Tilson ML. Tobacco retail outlets and vulnerable populations in Ontario, Canada. *International Journal of Environmental Research and Public Health*.2013;10(12):7299-7309. doi:10.3390/ijerph10127299
8. Chuang Y-C, Cubbin C, Ahn D, Winkleby MA. Effects of neighbourhood socioeconomic status and convenience store concentration on individual level smoking. *Journal of Epidemiology & Community Health*.2005;59(7):568-573. doi:10.1136/jech.2004.029041
9. Craigmile PF, Onnen N, Schwartz E, Glasser A, Roberts ME. Evaluating how licensing-law strategies will impact disparities in tobacco retailer density: a simulation in Ohio. *Tobacco Control*.2021;30(e2):e96-e103. doi:10.1136/tobaccocontrol-2020-055622
10. D'Alessandro J. *Tobacco retail outlet density in King County: implications for health equity and youth access to tobacco*. University of Washington; 2016. <http://hdl.handle.net/1773/36450>
11. Dalglish E, McLaughlin D, Dobson A, Gartner C. Cigarette availability and price in low and high socioeconomic areas. *Australian and New Zealand Journal of Public Health*.2013;37(4):371-376. doi:10.1111/1753-6405.12086
12. Duncan DT, Kawachi I, Melly SJ, Blossom J, Sorensen G, Williams DR. Demographic disparities in the tobacco retail environment in Boston: a citywide spatial analysis. *Public Health Reports*.2014;129(2):209-215. doi:10.1177/003335491412900217
13. Fakunle D, Morton CM, Peterson NA. The importance of income in the link between tobacco outlet density and demographics at the tract level of analysis in New Jersey. *Journal of Ethnicity in Substance Abuse*.2010;9(4):249-259. doi:10.1080/15332640.2010.522890
14. Fakunle DO, Milam AJ, Furr-Holden CD, Butler J, Thorpe RJ, LaVeist TA. The inequitable distribution of tobacco outlet density: the role of income in two Black Mid-Atlantic geopolitical areas. *Public Health*.2016;136:35-40. doi:10.1016/j.puhe.2016.02.032
15. Fakunle DO, Thorpe RJ, Furr-Holden CDM, Curriero FC, Leaf PJ. Does tobacco outlet inequality extend to high-white Mid-Atlantic jurisdictions? A study of socioeconomic status and density. *Journal of Racial and Ethnic Health Disparities*.2019;6(2):409-418. doi:10.1007/s40615-018-00538-9
16. Fakunle DO, Curriero FC, Leaf PJ, Furr-Holden DM, Thorpe RJ. Black, white, or green? The effects of racial composition and socioeconomic status on neighborhood-level tobacco outlet density. *Ethnicity & Health*.2021;26(7):1012-1027. doi:10.1080/13557858.2019.1620178
17. Galiatsatos P, Kineza C, Hwang S, et al. Neighbourhood characteristics and health outcomes: evaluating the association between socioeconomic status, tobacco store density and health outcomes in Baltimore City. *Tobacco Control*.2018;27(e1):e19-e24. doi:10.1136/tobaccocontrol-2017-053945
18. Giovenco DP, Spillane TE, Mauro CM, Hernández D. Evaluating the impact and equity of a tobacco-free pharmacy law on retailer density in New York City neighbourhoods. *Tobacco Control*.2019;28(5):548-554. doi:10.1136/tobaccocontrol-2018-054463
19. Hyland A, Travers MJ, Cummings KM, Bauer J, Alford T, Wieczorek WF. Tobacco outlet density and demographics in Erie County, New York. *American Journal of Public Health*.2003;93(7):1075-1076. doi:10.2105/ajph.93.7.1075

20. Jenkins C, Schwartz E, Onnen N, Craigmile PF, Roberts ME. Variations in tobacco retailer type across community characteristics: place matters. *Preventing Chronic Disease*.2022;19(E49):210454. doi:10.5888/pcd19.210454
21. King JL, Wagoner KG, Suerken CK, et al. Are waterpipe café, vape shop, and traditional tobacco retailer locations associated with community composition and young adult tobacco use in North Carolina and Virginia? *Substance Use & Misuse*.2020;55(14):2395-2402. doi:10.1080/10826084.2020.1823417
22. Kirst M, Chaiton M, O'Campo P. Tobacco outlet density, neighbourhood stressors and smoking prevalence in Toronto, Canada. *Health & Place*.2019;58:102171. doi:10.1016/j.healthplace.2019.102171
23. Kite J, Rissel C, Greenaway M, Williams K. Tobacco outlet density and social disadvantage in New South Wales, Australia. *Tobacco Control*.2014;23(2):181-182. doi:10.1136/tobaccocontrol-2012-050648
24. Kong AY. *Associations of tobacco retailer density with neighborhood sociodemographics, individual smoking behaviors, & COPD hospital discharge rates: a spatial health approach*. The University of North Carolina at Chapel Hill; 2020. <https://www.proquest.com/docview/2440646374?accountid=14244&parentSessionId=iF1CDNiTPsUJE9rX7PjtPKUaSueKt68K%2FMTp%2FKcFs6U%3D&sourcetype=Dissertations%20&%20Theses>
25. Kong AY, Delamater PL, Gottfredson NC, Ribisl KM, Baggett CD, Golden SD. Sociodemographic inequities in tobacco retailer density: Do neighboring places matter? *Health & Place*.2021;71:102653. doi:10.1016/j.healthplace.2021.102653
26. Kong AY, Delamater PL, Gottfredson NC, Ribisl KM, Baggett CD, Golden SD. Neighborhood inequities in tobacco retailer density and the presence of tobacco-selling pharmacies and tobacco shops. *Health Education & Behavior*.2022;49(3):478-487. doi:10.1177/10901981211008390
27. Laws MB, Whitman J, Bowser DM, Krech L. Tobacco availability and point of sale marketing in demographically contrasting districts of Massachusetts. *Tobacco Control*.2002;11(Suppl II):ii71-ii73. doi:10.1136/tc.11.suppl\_2.ii71
28. Lee JGL, Pan WK, Henriksen L, Goldstein AO, Ribisl KM. Is there a relationship between the concentration of same-sex couples and tobacco retailer density? *Nicotine & Tobacco Research*.2016;18(2):147-155. doi:10.1093/ntr/ntv046
29. Lee JGL, Sun DL, Schleicher NM, Ribisl KM, Luke DA, Henriksen L. Inequalities in tobacco outlet density by race, ethnicity and socioeconomic status, 2012, USA: results from the ASPIRE Study. *Journal of Epidemiology and Community Health*.2017;71(5):487-492. doi:10.1136/jech-2016-208475
30. Loomis BR, Kim AE, Goetz JL, Juster HR. Density of tobacco retailers and its association with sociodemographic characteristics of communities across New York. *Public Health*.2013;127(4):333-338. doi:10.1016/j.puhe.2013.01.013
31. Marashi-Pour S, Cretikos M, Lyons C, Rose N, Jalaludin B, Smith J. The association between the density of retail tobacco outlets, individual smoking status, neighbourhood socioeconomic status and school locations in New South Wales, Australia. *Spatial and Spatio-temporal Epidemiology*.2015;12:1-7. doi:10.1016/j.sste.2014.09.001
32. Marsh L, Doscher C, Robertson LA. Characteristics of tobacco retailers in New Zealand. *Health & Place*.2013;23:165-170. doi:10.1016/j.healthplace.2013.07.003
33. Marsh L, Doscher C, Cameron C, Robertson L, Petrović-Van Der Deen FS. How would the tobacco retail landscape change if tobacco was only sold through liquor stores, petrol stations or pharmacies? *Australian and New Zealand Journal of Public Health*.2020;44(1):34-39. doi:10.1111/1753-6405.12957
34. Mayers RS, Wiggins LL, Fulghum FH, Peterson NA. Tobacco outlet density and demographics: a geographically weighted regression analysis. *Prevention Science*.2012;13(5):462-471. doi:10.1007/s11121-011-0273-y
35. Melody SM, Martin-Gall V, Harding B, Veitch MGK. The retail availability of tobacco in Tasmania: evidence for a socio-economic and geographical gradient. *Medical Journal of Australia*.2018;208(5):205-208. doi:10.5694/mja17.00765
36. Mills SD, Kong AY, Reimold AE, Baggett CD, Wiesen CA, Golden SD. Sociodemographic disparities in tobacco retailer density in the United States, 2000–2017. *Nicotine & Tobacco Research*.2022;24(8):1291-1299. doi:10.1093/ntr/ntac020
37. Novak SP, Reardon SF, Raudenbush SW, Buka SL. Retail tobacco outlet density and youth cigarette smoking: a propensity-modeling approach. *American Journal of Public Health*.2006;96(4):670-676. doi:10.2105/ajph.2004.061622

38. Ogneva-Himmelberger Y, Ross L, Burdick W, Simpson S-A. Using geographic information systems to compare the density of stores selling tobacco and alcohol: youth making an argument for increased regulation of the tobacco permitting process in Worcester, Massachusetts, USA. *Tobacco Control*.2010;19(6):475-480. doi:10.1136/tc.2008.029173
39. Paul CL, Mee KJ, Judd TM, et al. Anywhere, anytime: Retail access to tobacco in New South Wales and its potential impact on consumption and quitting. *Social Science & Medicine*.2010;71(4):799-806. doi:10.1016/j.socscimed.2010.05.011
40. Peterson NA, Yu D, Morton CM, Reid RJ, Sheffer MA, Schneider JE. Tobacco outlet density and demographics at the tract level of analysis in New Jersey: A statewide analysis. *Drugs: Education, Prevention and Policy*.2011;18(1):47-52. doi:10.3109/09687630903514891
41. Purushothaman V, Cuomo RE, Leas E, Li J, Strong D, Mackey TM. Longitudinal analysis of tobacco and vape retail density in California. *Tobacco Induced Diseases*.2022;20(October):87. doi:10.18332/tid/153506
42. Raskind IG, Vishwakarma M, Schleicher NC, Andersen-Rodgers E, Henriksen L. The changing retail landscape for tobacco: dollar stores and the availability of cheap cigarettes among tobacco-related priority populations. *Tobacco Control*.2022;31(e2):e140-e147. doi:10.1136/tobaccocontrol-2020-056389
43. Reid RJ, Morton CM, Garcia-Reid P, Peterson NA, Yu D. Examining tobacco outlet concentration in New Jersey: does income and ethnicity matter? *Journal of Ethnicity in Substance Abuse*.2013;12(3):197-209. doi:10.1080/15332640.2013.798750
44. Rodriguez D, Carlos HA, Adachi-Mejia AM, Berke EM, Sargent JD. Predictors of tobacco outlet density nationwide: a geographic analysis. *Tobacco Control*.2013;22(5):349-355. doi:10.1136/tobaccocontrol-2011-050120
45. Rodriguez D, Carlos HA, Adachi-Mejia AM, Berke EM, Sargent J. Retail tobacco exposure: using geographic analysis to identify areas with excessively high retail density. *Nicotine & Tobacco Research*.2014;16(2):155-165. doi:10.1093/ntr/ntt126
46. Schneider JE, Reid RJ, Peterson NA, Lowe JB, Hughey J. Tobacco outlet density and demographics at the tract level of analysis in Iowa: implications for environmentally based prevention initiatives. *Prevention Science*.2005;6(4):319-325. doi:10.1007/s11121-005-0016-z
47. Schneider S, Gruber J. Neighbourhood deprivation and outlet density for tobacco, alcohol and fast food: first hints of obesogenic and addictive environments in Germany. *Public Health Nutrition*.2013;16(7):1168-1177. doi:10.1017/s1368980012003321
48. Schwartz E, Onnen N, Craigmile PF, Roberts ME. The legacy of redlining: Associations between historical neighborhood mapping and contemporary tobacco retailer density in Ohio. *Health & Place*.2021;68:102529. doi:10.1016/j.healthplace.2021.102529
49. Shortt NK, Tisch C, Pearce J, et al. A cross-sectional analysis of the relationship between tobacco and alcohol outlet density and neighbourhood deprivation. *BMC Public Health*.2015;15(1):1014. doi:10.1186/s12889-015-2321-1
50. Siahpush M, Jones PR, Singh GK, Timsina LR, Martin J. Association of availability of tobacco products with socio-economic and racial/ethnic characteristics of neighbourhoods. *Public Health*.2010;124(9):525-529. doi:10.1016/j.puhe.2010.04.010
51. Siegel SD, Brooks MM, Gbadebo BM, Laughery JT. Using geospatial analyses of linked electronic health records and tobacco outlet data to address the social determinants of smoking. *Preventing Chronic Disease*.2019;16(E152):190186. doi:10.5888/pcd16.190186
52. Tucker-Seeley RD, Bezold CP, James P, Miller M, Wallington SF. Retail pharmacy policy to end the sale of tobacco products: what is the impact on disparity in neighborhood density of tobacco outlets? *Cancer Epidemiology, Biomarkers & Prevention*.2016;25(9):1305-1310. doi:10.1158/1055-9965.Epi-15-1234
53. Wheeler DC, Do EK, Hayes RB, et al. Neighborhood disadvantage and tobacco retail outlet and vape shop outlet rates. *International Journal of Environmental Research and Public Health*.2020;17(8):2864. doi:10.3390/ijerph17082864
54. Wheeler DC, Boyle J, Barsell DJ, et al. Associations of alcohol and tobacco retail outlet rates with neighborhood disadvantage. *International Journal of Environmental Research and Public Health*.2022;19(3):1134. doi:10.3390/ijerph19031134
55. Wheeler DC, Boyle J, Barsell DJ, et al. Spatially varying associations of neighborhood disadvantage with alcohol and tobacco retail outlet rates. *International Journal of Environmental Research and Public Health*.2022;19(9):5244. doi:10.3390/ijerph19095244
56. Wood LJ, Pereira G, Middleton N, Foster S. Socioeconomic area disparities in tobacco retail outlet density: a Western Australian analysis. *Medical Journal of Australia*.2013;198(9):489-491. doi:10.5694/mja12.11539

57. Yu D, Peterson NA, Reid RJ. Exploring the impact of non-normality on spatial non-stationarity in geographically weighted regression analyses: tobacco outlet density in New Jersey. *GIScience & Remote Sensing*.2009;46(3):329-346. doi:10.2747/1548-1603.46.3.329

58. Yu D, Peterson NA, Sheffer MA, Reid RJ, Schnieder JE. Tobacco outlet density and demographics: Analysing the relationships with a spatial regression approach. *Public Health*.2010;124(7):412-416. doi:10.1016/j.puhe.2010.03.024
